# Supplementary material for: Combined BSA-Seq Based Mapping and RNA-Seq Profiling Reveal Candidate Genes Associated with Plant Architecture in Brassica napus
Source: MDPI journal article supplement (doi:10.3390/ijms23052472), 2022-02-23
Supplement: s1 [file s1]

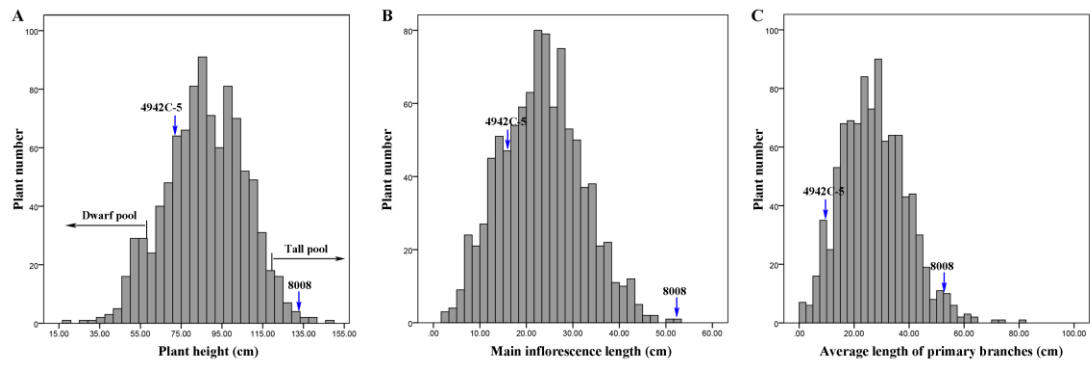

**Figure S1.** (A) Frequency distribution of plant height in the BC<sub>8</sub> population. (B) Frequency distribution of main inflorescence length in the BC<sub>8</sub> population. (C) Frequency distribution of average length of primary branches in the BC<sub>8</sub> population.

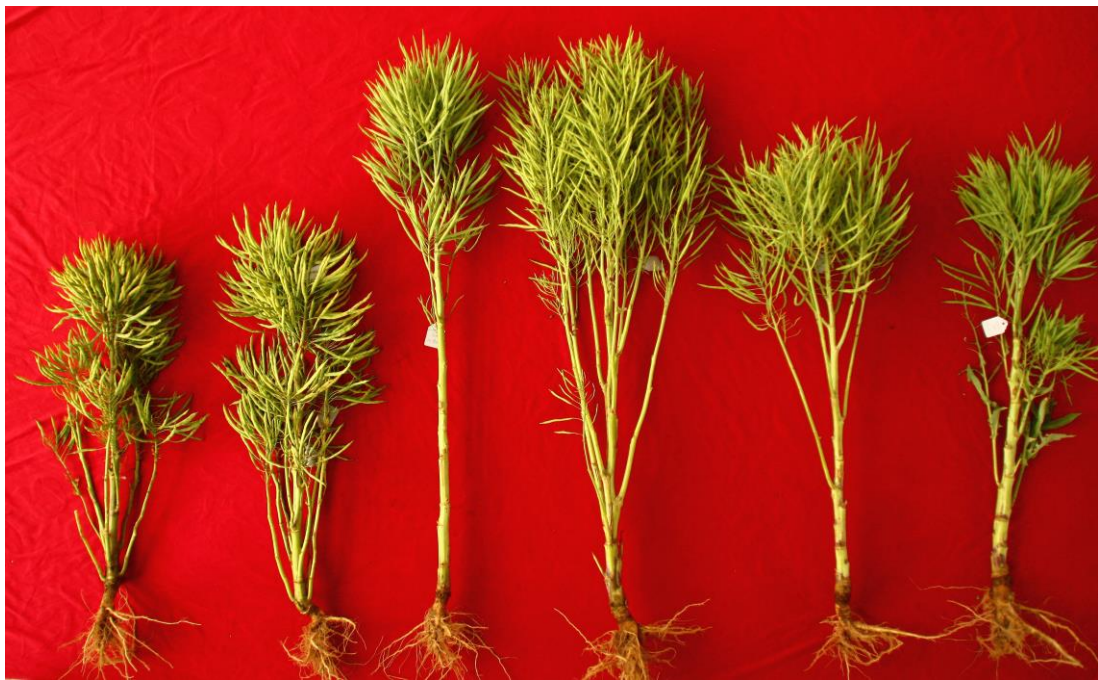

**Figure S2.** Plant architecture of offspring derived from crosses between 4942C-5 and 8008.

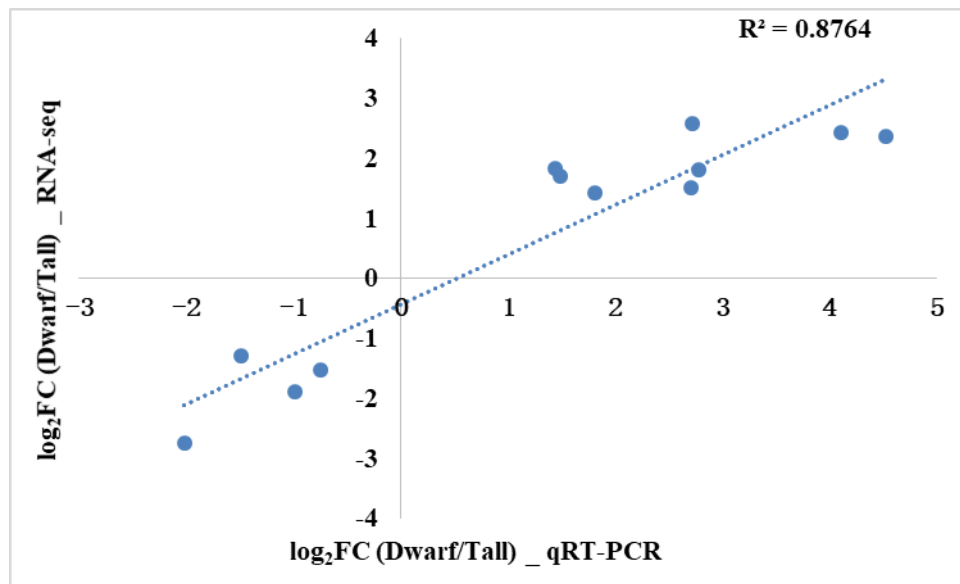

**Figure S3.** Correlation of the gene expression ratios between qRT-PCR and RNA-seq data. Expression abundance of 12 selected DEGs is presented as the ratio of Tall and Dwarf plants. Data represent mean values  $\pm$  SE of three biological replicates and three technical replicates of each sample.

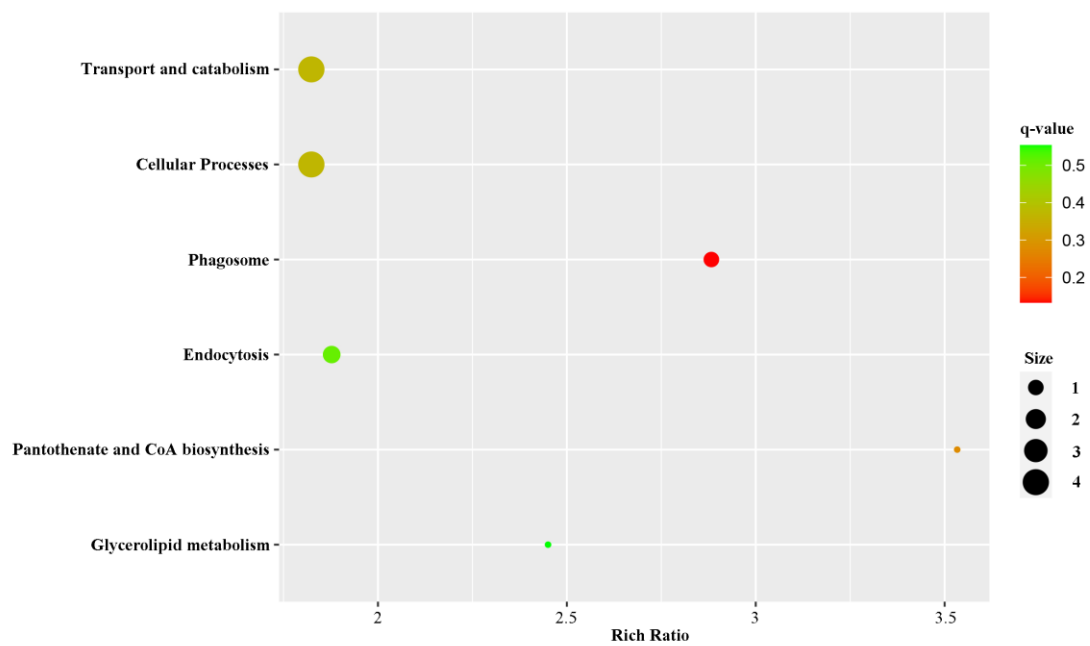

**Figure S4.** KEGG pathway enrichment of 542 DEGs in the candidate intervals.
