# Supplementary material for: Combined BSA-Seq Based Mapping and RNA-Seq Profiling Reveal Candidate Genes Associated with Plant Architecture in Brassica napus
Source: Int J Mol Sci. 2022 Feb 23;23(5):2472. doi: 10.3390/ijms23052472 (PMC8910715; doi:10.3390/ijms23052472)
Supplement: Supplementary file 1 [file ijms-23-02472-s001.zip › Supplementary Tables.xlsx]

## Sheet: Table S1
Table S1 Identification of phytohormones in Tall and Dwarf plants from BC8 population
Compounds	Class	Formula	CAS No	Exact mass(Da)	Ion mode	Ionization Model	Q1 (Da)	Q3 (Da)	Tall (ng/g)	Dwarf (ng/g)
5-Deoxystrigol	SL	C19H22O5	151716-18-6	330.147	Positive	[M+H]+	331.116	313.2	5.60±0.68	5.33±0.70
Gibberellin A9	GA	C19H24O4	427-77-0	316.167	Negative	[M-H]-	315.1	270.9	0.73±0.02	0.89±0.04*
Gibberellin A24	GA	C20H26O5	19427-32-8	346.178	Negative	[M-H]-	345.1	257.1	1.97±0.24	1.80±0.09
Gibberellin A20	GA	C19H24O5	19143-87-4	332.162	Negative	[M-H]-	331.3	287	5.32±0.10	3.24±0.07**
Gibberellin A15	GA	C20H26O4	13744-18-8	330.183	Negative	[M-H]-	329.1	131	3.03±0.07	2.65±0.08**
Total	GA	-	-	-	-	-	-	-	11.06±0.27	8.58±0.12**
1-Aminocyclopropanecarboxylic acid	ETH	C4H7NO2	22059-21-8	101.048	Positive	[M+H]+	102.2	56	125.37±19.21	137.04±2.79
trans-Zeatin-O-glucoside	CK	C16H23N5O6	56329-06-7	381.165	Positive	[M+H]+	382.088	220.2	2.33±0.33	2.97±0.08
trans-Zeatin riboside	CK	C15H21N5O5	6025-53-2	351.154	Positive	[M+H]+	352.2	219.9	0.82±0.08	0.80±0.08
trans-Zeatin	CK	C10H13N5O	1637-39-4	219.112	Positive	[M+H]+	220.2	136.1	1.43±0.20	1.52±0.09
cis-Zeatin riboside	CK	C15H21N5O5	15896-46-5	351.154	Positive	[M+H]+	352.135	220.1	2.09±0.19	1.60±0.19
N6-isopentenyladenine	CK	C10H13N5	2365-40-4	203.117	Positive	[M+H]+	204.3	136	0.04±0.01	0.03±0.00
N6-Isopentenyl-adenine-9-glucoside	CK	C16H23N5O5	83087-94-9	365.17	Positive	[M+H]+	366.113	204.1	0.49±0.07	0.33±0.06
N6-Isopentenyl-adenine-7-glucoside	CK	C16H23N5O5	59384-58-6	365.17	Positive	[M+H]+	366.107	204.2	0.32±0.03	0.23±0.01*
2-Methylthio-cis-zeatin riboside	CK	C16H23N5O5S	52049-48-6	397.142	Positive	[M+H]+	397.974	266.1	0.11±0.01	0.09±0.01
Total	CK	-	-	-	-	-	-	-	7.64±0.25	7.58±0.32
N-(3-Indolylacetyl)-L-valine	Auxin	C15H18N2O3	57105-42-7	274.132	Positive	[M+H]+	275.134	130	0.23±0.03	0.31±0.01*
N-(3-Indolylacetyl)-L-leucine	Auxin	C16H20N2O3	36838-63-8	288.147	Positive	[M+H]+	289.195	130	0.16±0.02	0.18±0.02
Methyl indole-3-acetate	Auxin	C11H11NO2	1912-33-0	189.079	Positive	[M+H]+	190.171	130	193.04±15.65	166.33±7.43
L-tryptophan	Auxin	C11H12N2O2	73-22-3	204.09	Positive	[M+H]+	205.063	188.1	448.87±27.12	414.95±38.82
Indole-3-carboxylic acid	Auxin	C9H7NO2	771-50-6	161.048	Negative	[M-H]-	160	116.1	5.92±0.46	9.06±1.40*
Indole-3-carboxaldehyde	Auxin	C9H7NO	487-89-8	145.053	Positive	[M+H]+	146.1	91	60.78±3.36	69.56±2.20*
Indole-3-acetyl-L-aspartic acid	Auxin	C14H14N2O5	2456-73-7	290.09	Negative	[M-H]-	288.929	131.9	0.81±0.10	0.99±0.14
Indole-3-acetyl glycine	Auxin	C12H12N2O3	13113-08-1	232.085	Positive	[M+H]+	233.056	130.1	1.46±0.16	1.33±0.12
Indole-3-acetyl glutamic acid	Auxin	C15H16N2O5	57105-48-3	304.106	Negative	[M-H]-	302.97	145.9	1.49±0.23	1.64±0.15
Indole-3-acetic acid	Auxin	C10H9NO2	87-51-4	175.063	Positive	[M+H]+	176.1	130.1	37.14±1.89	56.95±1.92**
3-Indoleacetonitrile	Auxin	C10H8N2	771-51-7	156.069	Positive	[M+H]+	157.037	130.1	1972.22±42.85	3298.23±153.57**
3-Indole acetamide	Auxin	C10H10N2O	879-37-8	174.079	Positive	[M+H]+	175.072	130.1	162.59±18.28	295.21±15.13**
Total	Auxin	-	-	-	-	-	-	-	2884.71±91.01	4314.73±183.20**
Abscisic acid	ABA	C15H20O4	21293-29-8	264.136	Negative	[M-H]-	263.1	153.1	19.99±2.87	13.26±1.11*
typhasterol	Brassinosteroids	C28H48O4	87734-68-7	448.355	Positive	[M+H]+	578.4	190	1.50±0.05	1.77±0.12*
castasterone	Brassinosteroids	C28H48O5	80736-41-0	464.35	Positive	[M+H]+	594.5	190.3	2.18±0.05	1.55±0.09**
brassinolide	Brassinosteroids	C28H48O6	72962-43-7	480.345	Positive	[M+H]+	610.4	190.2	0.48±0.01	0.40±0.04*
6-deoxocastasterone	Brassinosteroids	C28H50O4	87833-54-3	450.371	Positive	[M+H]+	580.4	190.1	2.46±0.29	2.51±0.07
28-norcastasterone	Brassinosteroids	C27H46O5	83464-85-1	450.335	Positive	[M+H]+	580.2	190	0.11±0.02	0.10±0.00
Total	Brassinosteroids	-	-	-	-	-	-	-	6.73±0.25	6.33±0.24
Asterisks indicate significant differences: *p < 0.05 and **p < 0.01.

## Sheet: Table S2
Table S2 Statistics of BSA-seq data
ID	Clean Reads	Clean Base	Q30(%)	GC(%)	Ave depth	Cov ratio(%)
Tall pool	170027343	50918865318	93.24	38.32	46	90.99
Dwarf pool	209301252	62689930464	92.55	38.07	57	90.74
8008	107082813	32000029730	92.13	44.37	19	91.17
4942C-5	107835406	32266132414	94.37	42.69	23	86.24

## Sheet: Table S3
Table S3 Statistics of RNA-seq data
Samplesa	Raw Reads	Clean Reads	Clean Base(G)	Low-quality Reads	Adapter Polluted Reads	Q30(%)	Mapping Rate
Tall1	47610332	46130700	6.44438	149392	1244626	93.49	0.9096
Tall2	46424626	45036240	6.29149	151176	1168576	93.23	0.9106
Tall3	46898930	45384650	6.34016	146464	1298360	93.45	0.9094
Dwarf1	47200308	45886048	6.41021	146948	1104516	93.44	0.9109
Dwarf2	42437350	41215062	5.75768	118172	1055006	93.45	0.9106
Dwarf3	48472978	47086964	6.57797	141966	1178160	93.28	0.911
a: Tall1, Tall2 and Tall3 represent three biological replicates of tall plants in the BC8 population; Dwarf1, Dwarf2 and Dwarf3 represent three biological replicates of dwarf plants in the BC8 population.

## Sheet: Table S4
Table S4 DEGs involved in plant hormone biosynthesis
Gene ID	Class	FPKM		FoldChange	log2FC(Dwarf/Tall)	pvalue	padj	up/down	Position	Uniprot:Description	Pfam:pfam_Name	Pfam:pfam_Description
		Tall	Dwarf
BnaA01g14030D	IAA	4.66645	1.52282	0.332618	-1.58806	9.24e-13	8.47e-12	down	chrA01:7126386-7130041:-	Tryptophan aminotransferase-related protein 2	Alliinase_C	Allinase. Allicin is a thiosulphinate that gives rise to dithiines, allyl sulphides and ajoenes, the three groups of active compounds in Allium species. Allicin is synthesized from sulfoxide cysteine derivatives by alliinase (EC:4.4.1.4), whose C-S lyase activity cleaves C(beta)-S(gamma) bonds. It is thought that this enzyme forms part of a primitive plant defence system.
BnaA07g00460D	IAA	16.4385	32.7442	2.04322	1.03085	1.98e-49	8.34e-48	up	chrA07:342702-345035:-	S-alkyl-thiohydroximate lyase SUR1	Aminotran_1_2	Aminotransferase class I and II.
BnaCnng75490D	IAA	15.0308	39.5507	2.70002	1.43297	4.11e-54	1.93e-52	up	chrCnn_random:76405514-76406703:+	Nitrilase 2	CN_hydrolase	Carbon-nitrogen hydrolase. This family contains hydrolases that break carbon-nitrogen bonds. The family includes: Nitrilase EC:3.5.5.1, Aliphatic amidase EC:3.5.1.4, Biotidinase EC:3.5.1.12, Beta-ureidopropionase EC:3.5.1.6. Nitrilase-related proteins generally have a conserved E-K-C catalytic triad, and are multimeric alpha-beta-beta-alpha sandwich proteins.
BnaC01g17380D	GA	1.09898	0.319592	0.296732	-1.75277	0.00103222	0.0032014	down	chrC01:11899681-11901232:-	Gibberellin 20 oxidase 1	2OG-FeII_Oxy	2OG-Fe(II) oxygenase superfamily. This family contains members of the 2-oxoglutarate (2OG) and Fe(II)-dependent oxygenase superfamily. This family includes the C-terminal of prolyl 4-hydroxylase alpha subunit. The holoenzyme has the activity EC:1.14.11.2 catalyzing the reaction: Procollagen L-proline + 2-oxoglutarate + O2 <=> procollagen trans- 4-hydroxy-L-proline + succinate + CO2. The full enzy…
BnaA01g35230D	GA	1.1914	0.147135	0.122877	-3.02471	5.2e-06	2.4e-05	down	chrA01_random:494531-496074:+	Gibberellin 20 oxidase 1	2OG-FeII_Oxy	2OG-Fe(II) oxygenase superfamily. This family contains members of the 2-oxoglutarate (2OG) and Fe(II)-dependent oxygenase superfamily. This family includes the C-terminal of prolyl 4-hydroxylase alpha subunit. The holoenzyme has the activity EC:1.14.11.2 catalyzing the reaction: Procollagen L-proline + 2-oxoglutarate + O2 <=> procollagen trans- 4-hydroxy-L-proline + succinate + CO2. The full enzy…
BnaCnng57040D	ABA	0.143733	2.90583	20.6626	4.36895	8.43e-20	1.2e-18	up	chrCnn_random:56816903-56819131:-	Abscisic acid 8'-hydroxylase 3	p450	Cytochrome P450. Cytochrome P450s are haem-thiolate proteins involved in the oxidative degradation of various compounds. They are particularly well known for their role in the degradation of environmental toxins and mutagens. They can be divided into 4 classes, according to the method by which electrons from NAD(P)H are delivered to the catalytic site. Sequence conservation is relatively low with…
BnaA09g51010D	ABA	3.39349	1.57992	0.481533	-1.05429	0.000604753	0.00196484	down	chrA09:33630642-33632524:+	Beta-carotene isomerase D27, chloroplastic	DUF4033	Domain of unknown function (DUF4033). This presumed domain is functionally uncharacterized. This domain family is found in bacteria and eukaryotes, and is approximately 80 amino acids in length.
BnaC04g40260D	ABA	0.593405	1.44909	2.51176	1.3287	0.000428474	0.00143558	up	chrC04:41245513-41250499:-	Abscisic acid 8'-hydroxylase 2	p450	Cytochrome P450. Cytochrome P450s are haem-thiolate proteins involved in the oxidative degradation of various compounds. They are particularly well known for their role in the degradation of environmental toxins and mutagens. They can be divided into 4 classes, according to the method by which electrons from NAD(P)H are delivered to the catalytic site. Sequence conservation is relatively low with…
BnaA02g05170D	ABA	1.92228	9.78782	5.22431	2.38524	1.58e-112	1.82e-110	up	chrA02:2321981-2329305:+	Indole-3-acetaldehyde oxidase	Ald_Xan_dh_C2	Molybdopterin-binding domain of aldehyde dehydrogenase.
BnaC05g02700D	ABA	3.78533	9.57863	2.5945	1.37546	8.73e-53	3.98e-51	up	chrC05:1296840-1302078:-	Benzaldehyde dehydrogenase (NAD(+))	Ald_Xan_dh_C2	Molybdopterin-binding domain of aldehyde dehydrogenase.
BnaA09g17560D	ABA	0.397825	1.69548	4.36689	2.12661	2.03e-08	1.26e-07	up	chrA09:10717124-10719394:-	Abscisic acid 8'-hydroxylase 3	p450	Cytochrome P450. Cytochrome P450s are haem-thiolate proteins involved in the oxidative degradation of various compounds. They are particularly well known for their role in the degradation of environmental toxins and mutagens. They can be divided into 4 classes, according to the method by which electrons from NAD(P)H are delivered to the catalytic site. Sequence conservation is relatively low with…
BnaA03g43960D	ABA	2.31744	6.79685	3.00333	1.58656	1.34e-20	1.99e-19	up	chrA03:22188554-22190997:+	Abscisic acid 8'-hydroxylase 1	p450	Cytochrome P450. Cytochrome P450s are haem-thiolate proteins involved in the oxidative degradation of various compounds. They are particularly well known for their role in the degradation of environmental toxins and mutagens. They can be divided into 4 classes, according to the method by which electrons from NAD(P)H are delivered to the catalytic site. Sequence conservation is relatively low with…
BnaC02g31560D	ABA	0.251696	2.75645	11.1889	3.484	5.75e-19	7.79e-18	up	chrC02:33737847-33740081:-	Abscisic acid 8'-hydroxylase 3	p450	Cytochrome P450. Cytochrome P450s are haem-thiolate proteins involved in the oxidative degradation of various compounds. They are particularly well known for their role in the degradation of environmental toxins and mutagens. They can be divided into 4 classes, according to the method by which electrons from NAD(P)H are delivered to the catalytic site. Sequence conservation is relatively low with…
BnaC07g35800D	ABA	3.00607	6.27529	2.13872	1.09675	1.18e-10	9.11e-10	up	chrC07:38094740-38097091:+	Abscisic acid 8'-hydroxylase 1	p450	Cytochrome P450. Cytochrome P450s are haem-thiolate proteins involved in the oxidative degradation of various compounds. They are particularly well known for their role in the degradation of environmental toxins and mutagens. They can be divided into 4 classes, according to the method by which electrons from NAD(P)H are delivered to the catalytic site. Sequence conservation is relatively low with…
BnaAnng27240D	ABA	1.45221	0.372985	0.261515	-1.93503	1.57e-06	7.79e-06	down	chrAnn_random:31195805-31198196:-	Abscisic acid 8'-hydroxylase 1	p450	Cytochrome P450. Cytochrome P450s are haem-thiolate proteins involved in the oxidative degradation of various compounds. They are particularly well known for their role in the degradation of environmental toxins and mutagens. They can be divided into 4 classes, according to the method by which electrons from NAD(P)H are delivered to the catalytic site. Sequence conservation is relatively low with…
BnaA01g07910D	lpha-Linolenic acid metabolism	8.71484	3.01529	0.356207	-1.48921	2.91414e-31	7.00932e-30	down	chrA01:3737025-3741726:+	Peroxisomal fatty acid beta-oxidation multifunctional protein AIM1	3HCDH_N	3-hydroxyacyl-CoA dehydrogenase, NAD binding domain. This family also includes lambda crystallin.
BnaA01g18160D	lpha-Linolenic acid metabolism	18.5694	7.82804	0.432107	-1.21054	5.25865e-48	2.12346e-46	down	chrA01:9655604-9659559:+	Peroxisomal acyl-coenzyme A oxidase 1	ACOX	Acyl-CoA oxidase. This is a family of Acyl-CoA oxidases EC:1.3.3.6. Acyl-coA oxidase converts acyl-CoA into trans-2- enoyl-CoA.
BnaA02g30470D	lpha-Linolenic acid metabolism	50.5198	17.0434	0.345578	-1.53292	7.11061e-179	1.50225e-176	down	chrA02:22042464-22045797:-	3-ketoacyl-CoA thiolase 5, peroxisomal	Thiolase_N	Thiolase, N-terminal domain. Thiolase is reported to be structurally related to beta-ketoacyl synthase (pfam00109), and also chalcone synthase.
BnaA02g16020D	lpha-Linolenic acid metabolism	0.843742	1.82359	2.21488	1.14723	2.24957e-06	1.09165e-05	up	chrA02:9485261-9489018:+	Lipoxygenase 4, chloroplastic	Lipoxygenase	Lipoxygenase.
BnaA05g10480D	lpha-Linolenic acid metabolism	13.9829	39.8824	2.92545	1.54866	1.40672e-97	1.32848e-95	up	chrA05:5737014-5740161:+	3-ketoacyl-CoA thiolase 2, peroxisomal	Thiolase_N	Thiolase, N-terminal domain. Thiolase is reported to be structurally related to beta-ketoacyl synthase (pfam00109), and also chalcone synthase.
BnaA05g30610D	lpha-Linolenic acid metabolism	8.63246	17.853	2.12051	1.08441	2.52846e-40	8.25091e-39	up	chrA05:21180417-21185074:-	Glyoxysomal fatty acid beta-oxidation multifunctional protein MFP-a	3HCDH_N	3-hydroxyacyl-CoA dehydrogenase, NAD binding domain. This family also includes lambda crystallin.
BnaA05g33880D	lpha-Linolenic acid metabolism	0.425186	5.88115	14.1901	3.82681	2.19569e-45	8.24862e-44	up	chrA05:22860114-22864718:+	Alpha-dioxygenase 1	An_peroxidase	Animal haem peroxidase.
BnaA06g33410D	lpha-Linolenic acid metabolism	0.730427	2.02216	2.83976	1.50577	0.000546097	0.0017909	up	chrA06:22115496-22116492:-	Allene oxide cyclase 2, chloroplastic	Allene_ox_cyc	Allene oxide cyclase. This family consists of several plant specific allene oxide cyclase proteins (EC:5.3.99.6). The allene oxide cyclase (AOC)-catalysed step in jasmonate (JA) biosynthesis is important in the wound response of tomato.
BnaA07g19600D	lpha-Linolenic acid metabolism	106.019	213.731	2.06729	1.04774	0	0	up	chrA07:15618498-15622489:-	Lipoxygenase 2, chloroplastic	Lipoxygenase	Lipoxygenase.
BnaA07g24860D	lpha-Linolenic acid metabolism	45.5797	160.607	3.61408	1.85363	0	0	up	chrA07:18554804-18560044:+	Lipoxygenase 2, chloroplastic	Lipoxygenase	Lipoxygenase.
BnaA07g24880D	lpha-Linolenic acid metabolism	80.7033	256.116	3.2549	1.70261	0	0	up	chrA07:18569890-18571616:+	Lipoxygenase 2, chloroplastic	Lipoxygenase	Lipoxygenase.
BnaA07g38540D	lpha-Linolenic acid metabolism	78.7471	158.544	2.06428	1.04564	3.4886e-188	8.21745e-186	up	chrA07_random:1693427-1695554:+	Lipoxygenase 2, chloroplastic	Lipoxygenase	Lipoxygenase.
BnaA08g23120D	lpha-Linolenic acid metabolism	0.697627	1.54003	2.25962	1.17608	1.65747e-05	7.10153e-05	up	chrA08:16576625-16580790:-	Lipoxygenase 3, chloroplastic	Lipoxygenase	Lipoxygenase.
BnaA09g32380D	lpha-Linolenic acid metabolism	16.0221	32.4629	2.07633	1.05404	7.00765e-42	2.38156e-40	up	chrA09:24026021-24029097:-	Acyl-coenzyme A oxidase 4, peroxisomal	Acyl-CoA_dh_N	Acyl-CoA dehydrogenase, N-terminal domain. The N-terminal domain of Acyl-CoA dehydrogenase is an all-alpha domain.
BnaAnng00900D	lpha-Linolenic acid metabolism	0.455647	2.54108	5.7151	2.51478	6.51232e-21	9.84195e-20	up	chrAnn_random:641181-645113:+	Triacylglycerol lipase SDP1	DUF3336	Domain of unknown function (DUF3336). This family of proteins are functionally uncharacterized. This family is found in bacteria and eukaryotes. This presumed domain is typically between 143 to 227 amino acids in length.
BnaAnng34320D	lpha-Linolenic acid metabolism	58.2528	123.612	2.17634	1.12191	5.39113e-142	8.46593e-140	up	chrAnn_random:39102501-39104270:+	Lipoxygenase 2, chloroplastic	Lipoxygenase	Lipoxygenase.
BnaC02g29610D	lpha-Linolenic acid metabolism	8.29993	19.7635	2.44332	1.28884	9.27563e-40	2.97241e-38	up	chrC02:30430639-30432336:-	Allene oxide synthase, chloroplastic	p450	Cytochrome P450. Cytochrome P450s are haem-thiolate proteins involved in the oxidative degradation of various compounds. They are particularly well known for their role in the degradation of environmental toxins and mutagens. They can be divided into 4 classes, according to the method by which electrons from NAD(P)H are delivered to the catalytic site. Sequence conservation is relatively low with…
BnaC04g11470D	lpha-Linolenic acid metabolism	41.7491	125.646	3.08571	1.6256	0	0	up	chrC04:8978893-8982129:+	3-ketoacyl-CoA thiolase 2, peroxisomal	Thiolase_N	Thiolase, N-terminal domain. Thiolase is reported to be structurally related to beta-ketoacyl synthase (pfam00109), and also chalcone synthase.
BnaC08g23150D	lpha-Linolenic acid metabolism	19.6662	70.0497	3.65174	1.86859	3.45667e-204	9.14033e-202	up	chrC08:25516750-25519826:-	Acyl-coenzyme A oxidase 4, peroxisomal	Acyl-CoA_dh_N	Acyl-CoA dehydrogenase, N-terminal domain. The N-terminal domain of Acyl-CoA dehydrogenase is an all-alpha domain.
BnaC09g52570D	lpha-Linolenic acid metabolism	0.156288	0.811782	5.29932	2.40581	0.00485446	0.0128324	up	chrC09_random:1914341-1915255:-	Allene oxide cyclase 2, chloroplastic	Allene_ox_cyc	Allene oxide cyclase. This family consists of several plant specific allene oxide cyclase proteins (EC:5.3.99.6). The allene oxide cyclase (AOC)-catalysed step in jasmonate (JA) biosynthesis is important in the wound response of tomato.
BnaCnng10420D	lpha-Linolenic acid metabolism	1.71945	5.53837	3.29868	1.72189	1.7515e-26	3.48818e-25	up	chrCnn_random:9423365-9427048:-	Triacylglycerol lipase SDP1	DUF3336	Domain of unknown function (DUF3336). This family of proteins are functionally uncharacterized. This family is found in bacteria and eukaryotes. This presumed domain is typically between 143 to 227 amino acids in length.
BnaCnng62430D	lpha-Linolenic acid metabolism	1.41826	3.54604	2.56373	1.35824	2.16325e-10	1.63464e-09	up	chrCnn_random:62239603-62242906:-	Peroxisomal fatty acid beta-oxidation multifunctional protein AIM1	3HCDH_N	3-hydroxyacyl-CoA dehydrogenase, NAD binding domain. This family also includes lambda crystallin.

## Sheet: Table S5
Table S5 DEGs involved in plant hormone signal transduction
Gene ID	Class	FPKM		FoldChange	log2FC(Dwarf/Tall)	pvalue	padj	up/down	Position	Uniprot:Description	Pfam:pfam_Name	Pfam:pfam_Description
		Tall	Dwarf
BnaA01g00580D	IAA	0.914673	0.228254	0.253953	-1.97737	8.72267e-05	0.000331179	down	chrA01:315446-317614:-	Indole-3-acetic acid-amido synthetase GH3.3	GH3	GH3 auxin-responsive promoter.
BnaA01g02420D	IAA	3.16916	0.29531	0.0930449	-3.42593	1.03919e-07	5.98542e-07	down	chrA01:1225690-1226301:+	Auxin-induced protein 15A	Auxin_inducible	Auxin responsive protein. This family consists of the protein products of the ARG7 auxin responsive genes family none of which have any identified functional role.
BnaA01g07810D	IAA	4.19079	0.692927	0.169517	-2.5605	5.84225e-09	3.84969e-08	down	chrA01:3704599-3705565:+	Auxin-responsive protein IAA27	AUX_IAA	AUX/IAA family. Transcription of the AUX/IAA family of genes is rapidly induced by the plant hormone auxin. Some members of this family are longer and contain an N terminal DNA binding domain. The function of this region is uncertain.
BnaA01g08280D	IAA	1.9516	0.397874	0.207116	-2.27149	5.46233e-07	2.89063e-06	down	chrA01:3942360-3944177:-	Auxin-responsive protein IAA11	AUX_IAA	AUX/IAA family. Transcription of the AUX/IAA family of genes is rapidly induced by the plant hormone auxin. Some members of this family are longer and contain an N terminal DNA binding domain. The function of this region is uncertain.
BnaA06g03570D	IAA	2.44891	0.175512	0.0730834	-3.77431	2.59827e-17	3.20665e-16	down	chrA06:2186494-2190432:-	4-substituted benzoates-glutamate ligase GH3.12	GH3	GH3 auxin-responsive promoter.
BnaA07g35660D	IAA	12.1244	4.8853	0.414155	-1.27176	3.05477e-12	2.69196e-11	down	chrA07:23903556-23904676:+	Auxin-responsive protein IAA15	AUX_IAA	AUX/IAA family. Transcription of the AUX/IAA family of genes is rapidly induced by the plant hormone auxin. Some members of this family are longer and contain an N terminal DNA binding domain. The function of this region is uncertain.
BnaA09g07990D	IAA	1.89123	0.335958	0.185436	-2.43101	0.000702614	0.0022542	down	chrA09:3874056-3874655:-	Auxin-induced protein X10A	Auxin_inducible	Auxin responsive protein. This family consists of the protein products of the ARG7 auxin responsive genes family none of which have any identified functional role.
BnaC01g03670D	IAA	1.95485	0.826057	0.436786	-1.195	0.0216729	0.0477034	down	chrC01:1894283-1894960:+	Auxin-induced protein 15A	Auxin_inducible	Auxin responsive protein. This family consists of the protein products of the ARG7 auxin responsive genes family none of which have any identified functional role.
BnaA01g24190D	IAA	3.29464	7.35395	2.28496	1.19217	5.4966e-10	3.99652e-09	up	chrA01:16609896-16611098:+	Auxin-responsive protein IAA2	AUX_IAA	AUX/IAA family. Transcription of the AUX/IAA family of genes is rapidly induced by the plant hormone auxin. Some members of this family are longer and contain an N terminal DNA binding domain. The function of this region is uncertain.
BnaA02g01560D	IAA	1.22912	4.86591	4.05805	2.02079	1.79363e-21	2.79307e-20	up	chrA02:733426-735766:+	4-substituted benzoates-glutamate ligase GH3.12	GH3	GH3 auxin-responsive promoter.
BnaA03g17600D	IAA	0.306818	0.863705	2.88783	1.52999	0.000684962	0.00220325	up	chrA03:8274346-8280535:+	Auxin transporter protein 1	Aa_trans	Transmembrane amino acid transporter protein. This transmembrane region is found in many amino acid transporters including UNC-47 and MTR. UNC-47 encodes a vesicular amino butyric acid (GABA) transporter, (VGAT). UNC-47 is predicted to have 10 transmembrane domains. MTR is a N system amino acid transporter system protein involved in methyltryptophan resistance. Other members of this family includ…
BnaA04g01150D	IAA	0.568266	1.46317	2.64496	1.40325	0.00819498	0.0204215	up	chrA04:743601-744388:-	Auxin-induced protein X10A	Auxin_inducible	Auxin responsive protein. This family consists of the protein products of the ARG7 auxin responsive genes family none of which have any identified functional role.
BnaA07g08630D	IAA	0.579244	2.67956	4.75114	2.24827	7.97229e-15	8.39333e-14	up	chrA07:8697848-8700546:-	Indole-3-acetic acid-amido synthetase GH3.17	GH3	GH3 auxin-responsive promoter.
BnaA09g38680D	IAA	1.25985	3.63277	2.95504	1.56318	7.6481e-05	0.000293122	up	chrA09:27596917-27597526:+	Auxin-induced protein X10A	Auxin_inducible	Auxin responsive protein. This family consists of the protein products of the ARG7 auxin responsive genes family none of which have any identified functional role.
BnaA10g16750D	IAA	1.32637	3.06309	2.36171	1.23983	0.0161521	0.0369692	up	chrA10:12629951-12630369:-	Auxin-induced protein 15A	Auxin_inducible	Auxin responsive protein. This family consists of the protein products of the ARG7 auxin responsive genes family none of which have any identified functional role.
BnaC01g01570D	IAA	2.07339	4.25516	2.10172	1.07157	5.08045e-08	3.0292e-07	up	chrC01:765168-767374:-	Indole-3-acetic acid-amido synthetase GH3.3	GH3	GH3 auxin-responsive promoter.
BnaC01g06240D	IAA	0.663713	1.57974	2.44599	1.29042	0.00508547	0.0133714	up	chrC01:3291259-3292575:-	Auxin-responsive protein IAA29	AUX_IAA	AUX/IAA family. Transcription of the AUX/IAA family of genes is rapidly induced by the plant hormone auxin. Some members of this family are longer and contain an N terminal DNA binding domain. The function of this region is uncertain.
BnaC01g19430D	IAA	2.1287	6.27175	3.02063	1.59485	7.16253e-22	1.1436e-20	up	chrC01:13450367-13453174:+	Indole-3-acetic acid-amido synthetase GH3.5	GH3	GH3 auxin-responsive promoter.
BnaC01g36030D	IAA	1.06189	2.8519	2.75146	1.4602	0.000125998	0.000465616	up	chrC01:35307484-35308841:-	Auxin-responsive protein IAA19	AUX_IAA	AUX/IAA family. Transcription of the AUX/IAA family of genes is rapidly induced by the plant hormone auxin. Some members of this family are longer and contain an N terminal DNA binding domain. The function of this region is uncertain.
BnaC03g05840D	IAA	17.7601	38.2727	2.21055	1.14441	1.96977e-17	2.45315e-16	up	chrC03:2850582-2851007:+	Indole-3-acetic acid-amido synthetase GH3.17	GH3	GH3 auxin-responsive promoter.
BnaC04g22040D	IAA	0.975026	2.07818	2.18776	1.12946	0.00742713	0.0187213	up	chrC04:23180510-23181297:-	Auxin-induced protein X10A	Auxin_inducible	Auxin responsive protein. This family consists of the protein products of the ARG7 auxin responsive genes family none of which have any identified functional role.
BnaC09g43750D	IAA	3.87359	12.3917	3.28127	1.71426	5.52172e-41	1.84444e-39	up	chrC09:44896963-44899324:-	4-substituted benzoates-glutamate ligase GH3.12	GH3	GH3 auxin-responsive promoter.
BnaCnng39150D	IAA	1.5759	3.31127	2.15464	1.10744	1.39091e-06	6.98027e-06	up	chrCnn_random:37890706-37893034:-	Indole-3-acetic acid-amido synthetase GH3.6	GH3	GH3 auxin-responsive promoter.
BnaCnng41900D	IAA	0.949009	3.89163	4.20011	2.07043	4.70471e-19	6.41902e-18	up	chrCnn_random:40825855-40828823:-	Indole-3-acetic acid-amido synthetase GH3.17	GH3	GH3 auxin-responsive promoter.
BnaA01g02190D	BR	5.64792	1.82174	0.33047	-1.59741	4.15631e-17	5.06543e-16	down	chrA01:1087445-1090623:+	Probable serine/threonine-protein kinase At4g35230	Pkinase	Protein kinase domain.
BnaA01g03510D	BR	4.5373	1.24111	0.279465	-1.83926	1.07969e-21	1.70463e-20	down	chrA01:1647554-1651306:+	BRASSINOSTEROID INSENSITIVE 1-associated receptor kinase 1	Pkinase	Protein kinase domain.
BnaA01g08850D	BR	3.36968	0.67016	0.204916	-2.28689	2.91788e-17	3.59244e-16	down	chrA01:4276592-4279560:-	Probable serine/threonine-protein kinase At4g35230	Pkinase	Protein kinase domain.
BnaA01g09530D	BR	10.5202	2.83431	0.277774	-1.84802	1.02595e-28	2.24623e-27	down	chrA01:4679184-4681995:+	Shaggy-related protein kinase eta	Pkinase	Protein kinase domain.
BnaC01g03320D	BR	19.2968	42.248	2.24585	1.16726	1.38655e-73	9.55111e-72	up	chrC01:1721171-1724125:+	Probable serine/threonine-protein kinase At4g35230	Pkinase	Protein kinase domain.
BnaA01g13690D	GA	11.8636	4.21427	0.365363	-1.4526	8.72063e-15	9.14595e-14	down	chrA01:6972883-6973718:+	F-box protein GID2	F-box	F-box domain. This domain is approximately 50 amino acids long, and is usually found in the N-terminal half of a variety of proteins. Two motifs that are commonly found associated with the F-box domain are the leucine rich repeats (LRRs; pfam00560 and pfam07723) and the WD repeat (pfam00400). The F-box domain has a role in mediating protein-protein interactions in a variety of contexts, such as p…
BnaA09g55590D	GA	11.5666	26.8473	2.37871	1.25018	4.14176e-44	1.49431e-42	up	chrA09_random:3324916-3326756:+	Gibberellin receptor GID1B	Abhydrolase_3	alpha/beta hydrolase fold. This catalytic domain is found in a very wide range of enzymes.
BnaA01g00920D	CK	1.3863	0.635029	0.471622	-1.0843	0.0116471	0.0277894	down	chrA01:512029-513583:+	Two-component response regulator ARR18	Myb_DNA-binding	Myb-like DNA-binding domain. This family contains the DNA binding domains from Myb proteins, as well as the SANT domain family.
BnaA01g17750D	CK	3.81133	1.6595	0.444545	-1.1696	5.55754e-08	3.30261e-07	down	chrA01:9409548-9411653:-	Two-component response regulator ARR2	Myb_DNA-binding	Myb-like DNA-binding domain. This family contains the DNA binding domains from Myb proteins, as well as the SANT domain family.
BnaC01g26510D	CK	1.26969	0	0.00718422	-7.12095	1.25531e-08	7.97432e-08	down	chrC01:23390371-23391992:-	Cyclin-D3-3	Cyclin_N	Cyclin, N-terminal domain. Cyclins regulate cyclin dependent kinases (CDKs). Human cyclin-O is a Uracil-DNA glycosylase that is related to other cyclins. Cyclins contain two domains of similar all-alpha fold, of which this family corresponds with the N-terminal domain.
BnaC01g01940D	CK	9.14055	23.6233	2.6481	1.40496	5.5179e-38	1.67399e-36	up	chrC01:987296-988809:+	Two-component response regulator ARR18	Myb_DNA-binding	Myb-like DNA-binding domain. This family contains the DNA binding domains from Myb proteins, as well as the SANT domain family.
BnaC01g42890D	CK	0.558595	1.23637	2.26483	1.1794	0.0154805	0.0356452	up	chrC01_random:2180917-2182991:-	Two-component response regulator ARR5	Response_reg	Response regulator receiver domain. This domain receives the signal from the sensor partner in bacterial two-component systems. It is usually found N-terminal to a DNA binding effector domain.
BnaA02g01520D	JA	6.29222	23.2033	3.77928	1.91811	1.05342e-44	3.86529e-43	up	chrA02:701552-703721:+	Protein TIFY 9	CCT_2	Divergent CCT motif. This short motif is found in a number of plant proteins. It appears to be related to the N-terminal half of the CCT motif. The CCT motif is about 45 amino acids long and contains a putative nuclear localisation signal within the second half of the CCT motif.
BnaA05g22360D	JA	2.19308	5.04129	2.35713	1.23703	1.86791e-08	1.16438e-07	up	chrA05:17065190-17068186:-	Protein TIFY 6B	tify	tify domain. This short possible domain is found in a variety of plant transcription factors that contain GATA domains as well as other motifs. Although previously known as the Zim domain this is now called the tify domain after its most conserved amino acids. TIFY proteins can be further classified into two groups depending on the presence (group I) or absence (group II) of a C2C2-GATA domain. F…
BnaA06g13250D	JA	0.585187	4.48614	7.85283	2.97321	2.476e-16	2.85863e-15	up	chrA06:6946204-6947751:+	Protein TIFY 10A	tify	tify domain. This short possible domain is found in a variety of plant transcription factors that contain GATA domains as well as other motifs. Although previously known as the Zim domain this is now called the tify domain after its most conserved amino acids. TIFY proteins can be further classified into two groups depending on the presence (group I) or absence (group II) of a C2C2-GATA domain. F…
BnaA07g21950D	JA	4.94826	17.0569	3.54435	1.82552	3.19898e-10	2.37912e-09	up	chrA07:16899493-16899855:+	Protein TIFY 10B	DUF2346	Uncharacterized conserved protein (DUF2346). Members of this family of proteins have no known function.
BnaA07g23750D	JA	1.14282	2.93283	2.6326	1.39649	6.69938e-05	0.000259479	up	chrA07:17815621-17817074:-	Protein TIFY 7	tify	tify domain. This short possible domain is found in a variety of plant transcription factors that contain GATA domains as well as other motifs. Although previously known as the Zim domain this is now called the tify domain after its most conserved amino acids. TIFY proteins can be further classified into two groups depending on the presence (group I) or absence (group II) of a C2C2-GATA domain. F…
BnaA07g30200D	JA	6.34621	22.3843	3.6152	1.85408	7.01611e-25	1.29533e-23	up	chrA07:21433078-21435205:-	Protein TIFY 11B	CCT_2	Divergent CCT motif. This short motif is found in a number of plant proteins. It appears to be related to the N-terminal half of the CCT motif. The CCT motif is about 45 amino acids long and contains a putative nuclear localisation signal within the second half of the CCT motif.
BnaA10g20060D	JA	3.23559	12.1901	3.86406	1.95012	1.29258e-25	2.47792e-24	up	chrA10:14087373-14090536:-	Protein TIFY 9	CCT_2	Divergent CCT motif. This short motif is found in a number of plant proteins. It appears to be related to the N-terminal half of the CCT motif. The CCT motif is about 45 amino acids long and contains a putative nuclear localisation signal within the second half of the CCT motif.
BnaC05g14810D	JA	2.13853	10.1533	4.86301	2.28185	3.61054e-32	8.9469e-31	up	chrC05:8732759-8734515:+	Protein TIFY 10A	tify	tify domain. This short possible domain is found in a variety of plant transcription factors that contain GATA domains as well as other motifs. Although previously known as the Zim domain this is now called the tify domain after its most conserved amino acids. TIFY proteins can be further classified into two groups depending on the presence (group I) or absence (group II) of a C2C2-GATA domain. F…
BnaC05g35610D	JA	2.83885	7.78116	2.80658	1.48882	5.70365e-18	7.33972e-17	up	chrC05:34918960-34922263:-	Protein TIFY 6B	tify	tify domain. This short possible domain is found in a variety of plant transcription factors that contain GATA domains as well as other motifs. Although previously known as the Zim domain this is now called the tify domain after its most conserved amino acids. TIFY proteins can be further classified into two groups depending on the presence (group I) or absence (group II) of a C2C2-GATA domain. F…
BnaC06g22690D	JA	0.51064	2.65601	5.33539	2.41559	8.75522e-08	5.08706e-07	up	chrC06:24688124-24689626:+	Protein TIFY 10B	CCT_2	Divergent CCT motif. This short motif is found in a number of plant proteins. It appears to be related to the N-terminal half of the CCT motif. The CCT motif is about 45 amino acids long and contains a putative nuclear localisation signal within the second half of the CCT motif.
BnaC06g31830D	JA	5.98674	14.6957	2.51445	1.33024	5.63388e-22	9.03404e-21	up	chrC06:32241976-32244436:+	Protein TIFY 7	tify	tify domain. This short possible domain is found in a variety of plant transcription factors that contain GATA domains as well as other motifs. Although previously known as the Zim domain this is now called the tify domain after its most conserved amino acids. TIFY proteins can be further classified into two groups depending on the presence (group I) or absence (group II) of a C2C2-GATA domain. F…
BnaC06g33640D	JA	0.263679	2.17411	8.45903	3.08049	8.59364e-11	6.72687e-10	up	chrC06:33464323-33466422:-	Protein TIFY 11B	CCT_2	Divergent CCT motif. This short motif is found in a number of plant proteins. It appears to be related to the N-terminal half of the CCT motif. The CCT motif is about 45 amino acids long and contains a putative nuclear localisation signal within the second half of the CCT motif.
BnaC08g36840D	JA	2.3943	6.20892	2.65773	1.4102	5.12429e-14	5.13255e-13	up	chrC08:33903717-33907885:-	Protein TIFY 10A	Abhydrolase_3	alpha/beta hydrolase fold. This catalytic domain is found in a very wide range of enzymes.
BnaC08g48340D	JA	2.26544	8.37081	3.78276	1.91944	5.47103e-14	5.46384e-13	up	chrC08_random:3305685-3306622:-	Protein TIFY 11A	CCT_2	Divergent CCT motif. This short motif is found in a number of plant proteins. It appears to be related to the N-terminal half of the CCT motif. The CCT motif is about 45 amino acids long and contains a putative nuclear localisation signal within the second half of the CCT motif.
BnaC09g43860D	JA	11.8985	30.4245	2.62152	1.3904	8.14249e-37	2.37023e-35	up	chrC09:44962061-44964050:-	Protein TIFY 9	CCT_2	Divergent CCT motif. This short motif is found in a number of plant proteins. It appears to be related to the N-terminal half of the CCT motif. The CCT motif is about 45 amino acids long and contains a putative nuclear localisation signal within the second half of the CCT motif.
BnaCnng59530D	JA	1.17612	4.45481	3.88999	1.95976	9.42027e-19	1.26176e-17	up	chrCnn_random:59213238-59216267:+	Jasmonic acid-amido synthetase JAR1	GH3	GH3 auxin-responsive promoter.
BnaA06g22800D	ABA	1.75157	0.716813	0.420256	-1.25066	0.00194035	0.00565226	down	chrA06:15985554-15987282:-	Serine/threonine-protein kinase SRK2H	Pkinase	Protein kinase domain.
BnaAnng26550D	ABA	15.4469	3.47103	0.230669	-2.1161	4.40595e-60	2.36674e-58	down	chrAnn_random:30456414-30458977:+	ABSCISIC ACID-INSENSITIVE 5-like protein 6	bZIP_1	bZIP transcription factor. The Pfam entry includes the basic region and the leucine zipper region.
BnaA01g37370D	ABA	9.66473	19.8052	2.1028	1.07231	9.74309e-27	1.96328e-25	up	chrA01_random:2649846-2651493:-	Protein phosphatase 2C 37	PP2C	Protein phosphatase 2C. Protein phosphatase 2C is a Mn++ or Mg++ dependent protein serine/threonine phosphatase.
BnaA03g17720D	ABA	0.417962	1.25752	3.08762	1.6265	0.00485066	0.0128256	up	chrA03:8353447-8354313:+	Abscisic acid receptor PYL4	Bet_v_1	Pathogenesis-related protein Bet v I family. This family is named after Bet v 1, the major birch pollen allergen. This protein belongs to family 10 of plant pathogenesis-related proteins (PR-10), cytoplasmic proteins of 15-17 kd that are wide-spread among dicotyledonous plants. In recent years, a number of diverse plant proteins with low sequence similarity to Bet v 1 was identified. A classifica…
BnaA04g13420D	ABA	1.84681	12.4358	6.90381	2.78739	1.00228e-41	3.39498e-40	up	chrA04:11329692-11332324:-	Serine/threonine-protein kinase SRK2J	Pkinase	Protein kinase domain.
BnaA08g08460D	ABA	1.36336	4.70931	3.54576	1.8261	1.02164e-07	5.88928e-07	up	chrA08:8307655-8308469:+	Abscisic acid receptor PYR1	Polyketide_cyc2	Polyketide cyclase / dehydrase and lipid transport. This family contains polyketide cylcases/dehydrases which are enzymes involved in polyketide synthesis. It also includes other proteins of the START superfamily.
BnaAnng23920D	ABA	0.746552	1.54606	2.12318	1.08623	0.00251291	0.00712755	up	chrAnn_random:27420599-27422149:-	Protein phosphatase 2C 37	PP2C	Protein phosphatase 2C. Protein phosphatase 2C is a Mn++ or Mg++ dependent protein serine/threonine phosphatase.
BnaC01g18020D	ABA	54.4626	145.337	2.73697	1.45258	0	0	up	chrC01:12563895-12566145:-	Protein phosphatase 2C 56	PP2C	Protein phosphatase 2C. Protein phosphatase 2C is a Mn++ or Mg++ dependent protein serine/threonine phosphatase.
BnaC03g15210D	ABA	2.21725	6.83232	3.15646	1.65831	6.67556e-15	7.07171e-14	up	chrC03:7539236-7541464:-	Abscisic acid receptor PYL8	Polyketide_cyc2	Polyketide cyclase / dehydrase and lipid transport. This family contains polyketide cylcases/dehydrases which are enzymes involved in polyketide synthesis. It also includes other proteins of the START superfamily.
BnaC03g31730D	ABA	9.53606	25.3425	2.72471	1.44611	2.43201e-36	6.98028e-35	up	chrC03:19523342-19524503:+	Abscisic acid receptor PYL7	Polyketide_cyc2	Polyketide cyclase / dehydrase and lipid transport. This family contains polyketide cylcases/dehydrases which are enzymes involved in polyketide synthesis. It also includes other proteins of the START superfamily.
BnaC04g35560D	ABA	0.41221	2.1131	5.24673	2.39142	2.36789e-07	1.30707e-06	up	chrC04:37066354-37069209:-	Serine/threonine-protein kinase SRK2J	Pkinase	Protein kinase domain.
BnaC05g17260D	ABA	1.16084	2.28416	2.01176	1.00846	0.00547154	0.0142793	up	chrC05:10921616-10922842:-	Abscisic acid receptor PYL9	Polyketide_cyc2	Polyketide cyclase / dehydrase and lipid transport. This family contains polyketide cylcases/dehydrases which are enzymes involved in polyketide synthesis. It also includes other proteins of the START superfamily.
BnaC06g33910D	ABA	1.36096	3.87379	2.91434	1.54317	4.13145e-15	4.43509e-14	up	chrC06:33602454-33605094:+	Protein phosphatase 2C 16	PP2C	Protein phosphatase 2C. Protein phosphatase 2C is a Mn++ or Mg++ dependent protein serine/threonine phosphatase.
BnaC09g49910D	ABA	1.64859	6.27488	3.9021	1.96425	1.25396e-16	1.47771e-15	up	chrC09:48035079-48036202:-	Abscisic acid receptor PYL5	Polyketide_cyc2	Polyketide cyclase / dehydrase and lipid transport. This family contains polyketide cylcases/dehydrases which are enzymes involved in polyketide synthesis. It also includes other proteins of the START superfamily.
BnaA01g36840D	ETH	4.12746	8.47671	2.1036	1.07286	1.69444e-13	1.63215e-12	up	chrA01_random:2307400-2310048:+	Protein ETHYLENE INSENSITIVE 3	EIN3	Ethylene insensitive 3. Ethylene insensitive 3 (EIN3) proteins are a family of plant DNA-binding proteins that regulate transcription in response to the gaseous plant hormone ethylene, and are essential for ethylene-mediated responses including the triple response, cell growth inhibition, and accelerated senescence.
BnaA02g25110D	ETH	1.7197	8.86446	5.28859	2.40288	1.59577e-21	2.49349e-20	up	chrA02:18432456-18433274:-	Ethylene-responsive transcription factor 2	AP2	AP2 domain. This 60 amino acid residue domain can bind to DNA and is found in transcription factor proteins.
BnaA06g35500D	ETH	1.02044	7.07068	7.10124	2.82807	1.00394e-18	1.34206e-17	up	chrA06:23320790-23321561:+	Ethylene-responsive transcription factor 2	AP2	AP2 domain. This 60 amino acid residue domain can bind to DNA and is found in transcription factor proteins.
BnaA09g04600D	ETH	4.80667	12.3679	2.63824	1.39957	3.12626e-37	9.29846e-36	up	chrA09:2264467-2267046:+	EIN3-binding F-box protein 2	F-box	F-box domain. This domain is approximately 50 amino acids long, and is usually found in the N-terminal half of a variety of proteins. Two motifs that are commonly found associated with the F-box domain are the leucine rich repeats (LRRs; pfam00560 and pfam07723) and the WD repeat (pfam00400). The F-box domain has a role in mediating protein-protein interactions in a variety of contexts, such as p…
BnaAnng07060D	ETH	6.66929	27.2356	4.19079	2.06722	1.05008e-52	4.77147e-51	up	chrAnn_random:6932761-6933655:+	Ethylene-responsive transcription factor 2	AP2	AP2 domain. This 60 amino acid residue domain can bind to DNA and is found in transcription factor proteins.
BnaAnng25820D	ETH	2.4472	5.83049	2.44568	1.29024	3.25126e-13	3.07467e-12	up	chrAnn_random:29854520-29856596:+	Ethylene response sensor 2	GAF	GAF domain. This domain is present in cGMP-specific phosphodiesterases, adenylyl and guanylyl cyclases, phytochromes, FhlA and NifA. Adenylyl and guanylyl cyclases catalyse ATP and GTP to the second messengers cAMP and cGMP, respectively, these products up-regulating catalytic activity by binding to the regulatory GAF domain(s). The opposite hydrolysis reaction is catalysed by phosphodiesterase. …
BnaC01g41510D	ETH	0.512462	1.26434	2.53202	1.34029	2.93153e-06	1.402e-05	up	chrC01_random:667429-672074:-	Serine/threonine-protein kinase CTR1	EDR1	Ethylene-responsive protein kinase Le-CTR1. EDR1 regulates disease resistance and ethylene-induced senescence, and is also involved in stress response signalling and cell death regulation.
BnaC07g20040D	ETH	0.340762	3.22734	9.66189	3.27231	2.41263e-10	1.81372e-09	up	chrC07:26798404-26799212:-	Ethylene-responsive transcription factor 2	AP2	AP2 domain. This 60 amino acid residue domain can bind to DNA and is found in transcription factor proteins.
BnaC09g20090D	ETH	2.77278	7.99072	2.95316	1.56226	1.49349e-12	1.3474e-11	up	chrC09:17164110-17164978:-	Ethylene-responsive transcription factor 2	AP2	AP2 domain. This 60 amino acid residue domain can bind to DNA and is found in transcription factor proteins.
BnaCnng60520D	ETH	5.5774	31.055	5.71199	2.51399	3.03854e-76	2.16965e-74	up	chrCnn_random:60312949-60313848:+	Ethylene-responsive transcription factor 2	AP2	AP2 domain. This 60 amino acid residue domain can bind to DNA and is found in transcription factor proteins.
BnaCnng69330D	ETH	3.07966	7.79785	2.59658	1.37661	8.25018e-22	1.31266e-20	up	chrCnn_random:69185306-69187453:+	Ethylene response sensor 2	GAF	GAF domain. This domain is present in cGMP-specific phosphodiesterases, adenylyl and guanylyl cyclases, phytochromes, FhlA and NifA. Adenylyl and guanylyl cyclases catalyse ATP and GTP to the second messengers cAMP and cGMP, respectively, these products up-regulating catalytic activity by binding to the regulatory GAF domain(s). The opposite hydrolysis reaction is catalysed by phosphodiesterase. …
BnaA01g15290D	SA	3.52459	1.35859	0.39436	-1.34241	6.1617e-10	4.4619e-09	down	chrA01:7812716-7815642:+	Regulatory protein NPR1	NPR1_like_C	NPR1/NIM1 like defence protein C terminal. This family of proteins is found in eukaryotes. Proteins in this family are typically between 251 and 588 amino acids in length. The family is found in association with pfam00023, pfam00651. There are two conserved sequence motifs: LENRV and DLN. NPR1 (NIM1) is a defence protein in many plant species.
BnaA03g38630D	SA	97.1173	580.193	6.1269	2.61516	0	0	up	chrA03:19202989-19203618:-	Pathogenesis-related protein 1	CAP	Cysteine-rich secretory protein family. This is a large family of cysteine-rich secretory proteins, antigen 5, and pathogenesis-related 1 proteins (CAP) that are found in a wide range of organisms, including prokaryotes and non-vertebrate eukaryotes, The nine subfamilies of the mammalian CAP 'super'family include: the human glioma pathogenesis-related 1 (GLIPR1), Golgi associated pathogenesis rel…
BnaA06g24140D	SA	2.11383	7.14722	3.47116	1.79542	9.54469e-22	1.51393e-20	up	chrA06:16723922-16727301:+	Transcription factor TGA1	DOG1	Seed dormancy control. This family of plant proteins appears to be a highly specific controller seed dormancy.
BnaA07g20770D	SA	1.19373	5.60486	4.81687	2.2681	7.80844e-21	1.17704e-19	up	chrA07:16196309-16198498:-	Transcription factor TGA7	DOG1	Seed dormancy control. This family of plant proteins appears to be a highly specific controller seed dormancy.
BnaA07g33790D	SA	2.78427	12.1366	4.4709	2.16057	3.42355e-45	1.28027e-43	up	chrA07:23103450-23108760:+	Transcription factor TGA7	DOG1	Seed dormancy control. This family of plant proteins appears to be a highly specific controller seed dormancy.
BnaA08g20970D	SA	2.09408	4.3545	2.13695	1.09555	1.68734e-06	8.3584e-06	up	chrA08:15644089-15645854:-	Transcription factor TGA3	DOG1	Seed dormancy control. This family of plant proteins appears to be a highly specific controller seed dormancy.
BnaA09g07120D	SA	0.385761	1.11524	2.948	1.55973	0.0011315	0.00347825	up	chrA09:3481615-3485101:+	Transcription factor TGA1	DOG1	Seed dormancy control. This family of plant proteins appears to be a highly specific controller seed dormancy.
BnaAnng05410D	SA	7.81838	16.8872	2.21592	1.1479	9.21823e-34	2.43911e-32	up	chrAnn_random:5848264-5850572:+	Regulatory protein NPR3	NPR1_like_C	NPR1/NIM1 like defence protein C terminal. This family of proteins is found in eukaryotes. Proteins in this family are typically between 251 and 588 amino acids in length. The family is found in association with pfam00023, pfam00651. There are two conserved sequence motifs: LENRV and DLN. NPR1 (NIM1) is a defence protein in many plant species.
BnaC01g18130D	SA	4.876	9.71744	2.04479	1.03195	6.31451e-18	8.10289e-17	up	chrC01:12619106-12621768:+	Regulatory protein NPR2	NPR1_like_C	NPR1/NIM1 like defence protein C terminal. This family of proteins is found in eukaryotes. Proteins in this family are typically between 251 and 588 amino acids in length. The family is found in association with pfam00023, pfam00651. There are two conserved sequence motifs: LENRV and DLN. NPR1 (NIM1) is a defence protein in many plant species.
BnaC02g43620D	SA	0.205594	1.78008	8.89029	3.15223	8.09864e-10	5.80807e-09	up	chrC02:45804643-45806678:+	Transcription factor TGA1	DOG1	Seed dormancy control. This family of plant proteins appears to be a highly specific controller seed dormancy.
BnaC03g45470D	SA	113.345	592.493	5.36068	2.42242	0	0	up	chrC03:30460477-30461095:-	Pathogenesis-related protein 1	CAP	Cysteine-rich secretory protein family. This is a large family of cysteine-rich secretory proteins, antigen 5, and pathogenesis-related 1 proteins (CAP) that are found in a wide range of organisms, including prokaryotes and non-vertebrate eukaryotes, The nine subfamilies of the mammalian CAP 'super'family include: the human glioma pathogenesis-related 1 (GLIPR1), Golgi associated pathogenesis rel…
BnaC03g49070D	SA	1.23785	5.67748	4.69801	2.23205	4.43476e-38	1.34639e-36	up	chrC03:33920253-33923694:-	Transcription factor TGA1	DOG1	Seed dormancy control. This family of plant proteins appears to be a highly specific controller seed dormancy.
BnaC06g38430D	SA	0.226328	0.914312	4.1228	2.04363	0.000955649	0.00298789	up	chrC06:36004772-36010011:+	Transcription factor TGA7	DOG1	Seed dormancy control. This family of plant proteins appears to be a highly specific controller seed dormancy.
BnaC07g02890D	SA	9.27116	20.418	2.25672	1.17423	9.79161e-47	3.81845e-45	up	chrC07:3664882-3667454:-	Regulatory protein NPR3	NPR1_like_C	NPR1/NIM1 like defence protein C terminal. This family of proteins is found in eukaryotes. Proteins in this family are typically between 251 and 588 amino acids in length. The family is found in association with pfam00023, pfam00651. There are two conserved sequence motifs: LENRV and DLN. NPR1 (NIM1) is a defence protein in many plant species.
BnaC08g20170D	SA	4.77434	11.9216	2.55907	1.35562	1.73341e-18	2.29105e-17	up	chrC08:22921387-22923177:+	Transcription factor TGA3	DOG1	Seed dormancy control. This family of plant proteins appears to be a highly specific controller seed dormancy.
BnaC09g06840D	SA	1.55781	4.19759	2.75442	1.46175	4.89682e-10	3.57756e-09	up	chrC09:4236037-4239538:+	Transcription factor TGA1	DOG1	Seed dormancy control. This family of plant proteins appears to be a highly specific controller seed dormancy.

## Sheet: Table S6
Table S6 DEGs involved in cell wall and cell expansion
Gene ID	FPKM		FoldChange	log2FC(Dwarf/Tall)	pvalue	padj	up/down	Position	Uniprot:Description	Pfam:pfam_Name	Pfam:pfam_Description
	Tall	Dwarf
BnaA02g22470D	17.9245	65.2202	0.268134	-1.89897	6.67e-119	8.19e-117	up	chrA02:15006339-15008337:-	Xyloglucan endotransglucosylase/hydrolase protein 24	Glyco_hydro_16	Glycosyl hydrolases family 16.
BnaA02g26000D	3.26124	7.28656	0.436314	-1.19656	1.84e-11	1.52e-10	up	chrA02:19072685-19074756:+	Probable xyloglucan endotransglucosylase/hydrolase protein 27	Glyco_hydro_16	Glycosyl hydrolases family 16.
BnaA02g35250D	0.589386	9.74761	0.0588744	-4.08622	1.45e-30	3.41e-29	up	chrA02_random:153139-154120:+	Xyloglucan endotransglucosylase/hydrolase protein 22	Glyco_hydro_16	Glycosyl hydrolases family 16.
BnaA03g50050D	4.45453	17.8476	0.243378	-2.03873	5.12e-42	1.76e-40	up	chrA03:25936684-25938103:-	Xyloglucan endotransglucosylase/hydrolase protein 24	Glyco_hydro_16	Glycosyl hydrolases family 16.
BnaA03g50060D	0.151265	1.18964	0.124386	-3.00711	3.08e-05	0.000126176	up	chrA03:25943775-25945219:-	Probable xyloglucan endotransglucosylase/hydrolase protein 18	Glyco_hydro_16	Glycosyl hydrolases family 16.
BnaA06g34490D	3.36582	15.3391	0.214044	-2.22402	3.09e-54	1.46e-52	up	chrA06:22781504-22783856:-	Probable xyloglucan endotransglucosylase/hydrolase protein 27	Glyco_hydro_16	Glycosyl hydrolases family 16.
BnaA10g11500D	1.9058	52.9991	0.0351544	-4.83015	2.77e-183	5.98e-181	up	chrA10:9656813-9657931:-	Xyloglucan endotransglucosylase/hydrolase protein 22	Glyco_hydro_16	Glycosyl hydrolases family 16.
BnaAnng19040D	1.91741	5.28593	0.353989	-1.49822	2.39e-07	1.32e-06	up	chrAnn_random:20299753-20300644:+	Probable xyloglucan endotransglucosylase/hydrolase protein 16	Glyco_hydro_16	Glycosyl hydrolases family 16.
BnaAnng23050D	17.0383	56.5334	0.293882	-1.76669	2.2e-105	2.31e-103	up	chrAnn_random:25939713-25941335:+	Xyloglucan endotransglucosylase/hydrolase protein 24	Glyco_hydro_16	Glycosyl hydrolases family 16.
BnaC01g08120D	0.147156	2.71547	0.0528734	-4.24131	1.94e-11	1.6e-10	up	chrC01:4295083-4296376:+	Probable xyloglucan endotransglucosylase/hydrolase protein 18	Glyco_hydro_16	Glycosyl hydrolases family 16.
BnaC01g08130D	2.39098	6.91661	0.336845	-1.56984	7e-14	6.93e-13	up	chrC01:4310575-4311915:+	Xyloglucan endotransglucosylase/hydrolase protein 24	Glyco_hydro_16	Glycosyl hydrolases family 16.
BnaC01g11500D	0.545249	4.70484	0.113019	-3.14536	9.99e-20	1.42e-18	up	chrC01:7127675-7129935:-	Probable xyloglucan endotransglucosylase/hydrolase protein 29	Glyco_hydro_16	Glycosyl hydrolases family 16.
BnaC01g17710D	0.467551	2.15196	0.211584	-2.2407	6.13e-07	3.22e-06	up	chrC01:12160415-12161790:+	Probable xyloglucan endotransglucosylase/hydrolase protein 23	Glyco_hydro_16	Glycosyl hydrolases family 16.
BnaC03g67980D	6.11939	29.7003	0.200775	-2.31635	5.13e-83	4.11e-81	up	chrC03:57586079-57587828:+	Xyloglucan endotransglucosylase/hydrolase protein 24	Glyco_hydro_16	Glycosyl hydrolases family 16.
BnaC07g21270D	6.08463	14.6098	0.405772	-1.30126	7.63e-26	1.48e-24	up	chrC07:27924320-27926617:+	Probable xyloglucan endotransglucosylase/hydrolase protein 27	Glyco_hydro_16	Glycosyl hydrolases family 16.
BnaC07g42500D	3.99932	22.8939	0.1704	-2.553	1.03e-72	6.93e-71	up	chrC07:41922785-41924191:-	Xyloglucan endotransglucosylase/hydrolase protein 24	Glyco_hydro_16	Glycosyl hydrolases family 16.
BnaC07g42520D	2.33456	12.9266	0.175999	-2.50636	8.44e-37	2.45e-35	up	chrC07:41933610-41934894:-	Probable xyloglucan endotransglucosylase/hydrolase protein 18	Glyco_hydro_16	Glycosyl hydrolases family 16.
BnaC09g00910D	8.0111	1.67978	4.65997	2.22032	7.45e-20	1.07e-18	down	chrC09:481026-482222:-	Xyloglucan endotransglucosylase/hydrolase protein 9	Glyco_hydro_16	Glycosyl hydrolases family 16.
BnaC09g32750D	0.187744	4.82725	0.0382373	-4.70887	4.12e-18	5.35e-17	up	chrC09:35921798-35922960:+	Xyloglucan endotransglucosylase/hydrolase protein 22	Glyco_hydro_16	Glycosyl hydrolases family 16.
BnaCnng18010D	3.96435	8.18609	0.472212	-1.08249	3.13e-09	2.12e-08	up	chrCnn_random:16840835-16842290:-	Probable xyloglucan endotransglucosylase/hydrolase protein 8	Glyco_hydro_16	Glycosyl hydrolases family 16.
BnaCnng38050D	10.5478	23.8612	0.431533	-1.21246	1.33e-28	2.89e-27	up	chrCnn_random:36562559-36563880:-	Probable xyloglucan endotransglucosylase/hydrolase protein 16	Glyco_hydro_16	Glycosyl hydrolases family 16.
BnaA01g04600D	12.7041	3.42291	3.61677	1.8547	5.37e-91	4.76e-89	down	chrA01:2147740-2153117:+	Cellulose synthase A catalytic subunit 1 [UDP-forming]	Cellulose_synt	Cellulose synthase. Cellulose, an aggregate of unbranched polymers of beta-1,4-linked glucose residues, is the major component of wood and thus paper, and is synthesized by plants, most algae, some bacteria and fungi, and even some animals. The genes that synthesize cellulose in higher plants differ greatly from the well-characterized genes found in Acetobacter and Agrobacterium sp. More correctl…
BnaA04g28830D	1.60839	3.43734	0.456954	-1.12988	0.00151071	0.00451397	up	chrA04_random:1037625-1038429:-	Cellulose synthase-like protein B3	Cellulose_synt	Cellulose synthase. Cellulose, an aggregate of unbranched polymers of beta-1,4-linked glucose residues, is the major component of wood and thus paper, and is synthesized by plants, most algae, some bacteria and fungi, and even some animals. The genes that synthesize cellulose in higher plants differ greatly from the well-characterized genes found in Acetobacter and Agrobacterium sp. More correctl…
BnaC03g70880D	1.44851	3.85972	0.366134	-1.44956	4.95e-14	4.96e-13	up	chrC03:60426535-60429279:+	Cellulose synthase-like protein E1	Cellulose_synt	Cellulose synthase. Cellulose, an aggregate of unbranched polymers of beta-1,4-linked glucose residues, is the major component of wood and thus paper, and is synthesized by plants, most algae, some bacteria and fungi, and even some animals. The genes that synthesize cellulose in higher plants differ greatly from the well-characterized genes found in Acetobacter and Agrobacterium sp. More correctl…
BnaA01g29470D	0.805508	0.260633	0.327583	-1.61007	0.00164698	0.00487317	down	chrA01:20397298-20400369:+	Pectinesterase/pectinesterase inhibitor 3	Pectinesterase	Pectinesterase.
BnaA02g04440D	3.49885	1.53298	0.447901	-1.15875	2.42435e-06	1.17147e-05	down	chrA02:1992553-1996250:+	Probable pectinesterase 53	Pectinesterase	Pectinesterase.
BnaA03g21140D	2.51434	20.5746	8.38689	3.06814	8.12759e-106	8.60768e-104	up	chrA03:10019481-10021709:-	Probable pectinesterase/pectinesterase inhibitor 17	Pectinesterase	Pectinesterase.
BnaA05g04610D	1.24202	10.8326	8.93795	3.15994	3.49969e-56	1.75139e-54	up	chrA05:2458029-2460187:-	Probable pectinesterase/pectinesterase inhibitor 17	Pectinesterase	Pectinesterase.
BnaA05g25150D	31.5341	74.042	2.40747	1.26752	5.44686e-160	1.02878e-157	up	chrA05:18672482-18675632:+	Pectinesterase/pectinesterase inhibitor 3	Pectinesterase	Pectinesterase.
BnaA06g00690D	1.58672	5.01195	3.23947	1.69576	5.72862e-17	6.92402e-16	up	chrA06:453012-455493:-	Pectinesterase 1	Pectinesterase	Pectinesterase.
BnaA09g30050D	0.449873	1.47534	3.3692	1.75241	2.80698e-06	1.34526e-05	up	chrA09:22386311-22388574:-	Probable pectinesterase/pectinesterase inhibitor 6	Pectinesterase	Pectinesterase.
BnaA10g06710D	2.3344	15.6641	6.87155	2.78064	1.92246e-71	1.27705e-69	up	chrA10:5172031-5173593:-	Probable pectinesterase/pectinesterase inhibitor 61	Pectinesterase	Pectinesterase.
BnaAnng20820D	7.39661	22.1791	3.07444	1.62033	1.9701e-60	1.06807e-58	up	chrAnn_random:22964288-22966952:-	Probable pectinesterase/pectinesterase inhibitor 41	Pectinesterase	Pectinesterase.
BnaC01g37010D	25.288	69.5146	2.81796	1.49465	9.41451e-184	2.07453e-181	up	chrC01:36172453-36175991:+	Pectinesterase/pectinesterase inhibitor 3	Pectinesterase	Pectinesterase.
BnaC01g37020D	6.77119	13.9466	2.1139	1.07991	1.20207e-23	2.08674e-22	up	chrC01:36180539-36184246:+	Pectinesterase/pectinesterase inhibitor 3	Pectinesterase	Pectinesterase.
BnaC03g25220D	1.74705	19.5459	11.4686	3.51962	3.22459e-108	3.55277e-106	up	chrC03:14175207-14177098:-	Probable pectinesterase/pectinesterase inhibitor 17	Pectinesterase	Pectinesterase.
BnaC04g04080D	1.34152	18.6352	14.2285	3.83071	3.48885e-61	1.90913e-59	up	chrC04:3039202-3040805:-	Probable pectinesterase/pectinesterase inhibitor 17	Pectinesterase	Pectinesterase.
BnaC09g29660D	2.11648	7.58539	3.67676	1.87843	8.19888e-25	1.50488e-23	up	chrC09:32289642-32291218:-	Probable pectinesterase/pectinesterase inhibitor 61	Pectinesterase	Pectinesterase.
BnaA01g13460D	6.66398	1.59214	0.246293	-2.02155	3.64812e-22	5.91932e-21	down	chrA01:6846837-6849897:-	Probable polygalacturonase	Glyco_hydro_28	Glycosyl hydrolases family 28. Glycosyl hydrolase family 28 includes polygalacturonase EC:3.2.1.15 as well as rhamnogalacturonase A(RGase A), EC:3.2.1.-. These enzymes is important in cell wall metabolizm.
BnaA03g44380D	1.01957	0.457536	0.459492	-1.12189	0.0110934	0.0266344	down	chrA03:22497946-22499745:-	Polygalacturonase QRT3	Beta_helix	Right handed beta helix region. This region contains a parallel beta helix region that shares some similarity with Pectate lyases.
BnaA03g55610D	9.05072	23.1275	2.61946	1.38927	5.78993e-35	1.59052e-33	up	chrA03_random:350249-351449:-	Polygalacturonase inhibitor 2	LRRNT_2	Leucine rich repeat N-terminal domain. Leucine Rich Repeats pfam00560 are short sequence motifs present in a number of proteins with diverse functions and cellular locations. Leucine Rich Repeats are often flanked by cysteine rich domains. This domain is often found at the N-terminus of tandem leucine rich repeats.
BnaA04g24130D	1.13294	11.5004	10.4167	3.38082	3.16093e-71	2.09295e-69	up	chrA04:17746423-17749031:-	Polygalacturonase ADPG2	Glyco_hydro_28	Glycosyl hydrolases family 28. Glycosyl hydrolase family 28 includes polygalacturonase EC:3.2.1.15 as well as rhamnogalacturonase A(RGase A), EC:3.2.1.-. These enzymes is important in cell wall metabolizm.
BnaA06g04040D	25.9863	7.82533	0.308435	-1.69696	3.39653e-71	2.24533e-69	down	chrA06:2431329-2434179:-	Polygalacturonase At1g48100	Glyco_hydro_28	Glycosyl hydrolases family 28. Glycosyl hydrolase family 28 includes polygalacturonase EC:3.2.1.15 as well as rhamnogalacturonase A(RGase A), EC:3.2.1.-. These enzymes is important in cell wall metabolizm.
BnaA10g24080D	2.76124	11.814	4.38855	2.13374	1.21326e-31	2.96345e-30	up	chrA10:15781786-15783053:-	Polygalacturonase inhibitor 1	LRRNT_2	Leucine rich repeat N-terminal domain. Leucine Rich Repeats pfam00560 are short sequence motifs present in a number of proteins with diverse functions and cellular locations. Leucine Rich Repeats are often flanked by cysteine rich domains. This domain is often found at the N-terminus of tandem leucine rich repeats.
BnaA10g24090D	3.23113	9.50047	3.01284	1.59112	4.80824e-18	6.21673e-17	up	chrA10:15783658-15784901:-	Polygalacturonase inhibitor 1	LRRNT_2	Leucine rich repeat N-terminal domain. Leucine Rich Repeats pfam00560 are short sequence motifs present in a number of proteins with diverse functions and cellular locations. Leucine Rich Repeats are often flanked by cysteine rich domains. This domain is often found at the N-terminus of tandem leucine rich repeats.
BnaAnng19400D	1.23573	0.49218	0.407939	-1.29357	0.00387514	0.0105113	down	chrAnn_random:21058828-21061399:+	Polygalacturonase	Glyco_hydro_28	Glycosyl hydrolases family 28. Glycosyl hydrolase family 28 includes polygalacturonase EC:3.2.1.15 as well as rhamnogalacturonase A(RGase A), EC:3.2.1.-. These enzymes is important in cell wall metabolizm.
BnaC01g15660D	4.56135	9.98073	2.24355	1.16578	5.84186e-16	6.59417e-15	up	chrC01:10748643-10751697:-	Probable polygalacturonase	Glyco_hydro_28	Glycosyl hydrolases family 28. Glycosyl hydrolase family 28 includes polygalacturonase EC:3.2.1.15 as well as rhamnogalacturonase A(RGase A), EC:3.2.1.-. These enzymes is important in cell wall metabolizm.
BnaC09g48680D	1.76708	10.2019	5.93134	2.56836	1.11146e-32	2.81373e-31	up	chrC09:47437784-47439001:-	Polygalacturonase inhibitor 1	LRRNT_2	Leucine rich repeat N-terminal domain. Leucine Rich Repeats pfam00560 are short sequence motifs present in a number of proteins with diverse functions and cellular locations. Leucine Rich Repeats are often flanked by cysteine rich domains. This domain is often found at the N-terminus of tandem leucine rich repeats.
BnaA01g14130D	9.48408	3.21008	2.86665	1.51937	1.02e-19	1.45e-18	down	chrA01:7182266-7184135:-	Probable pectate lyase 18	Pec_lyase_C	Pectate lyase. This enzyme forms a right handed beta helix structure. Pectate lyase is an enzyme involved in the maceration and soft rotting of plant tissue.
BnaA05g30530D	1.49098	3.13094	0.465298	-1.10377	2.1e-05	8.85e-05	up	chrA05:21082553-21086671:+	Probable pectate lyase 8	Pec_lyase_C	Pectate lyase. This enzyme forms a right handed beta helix structure. Pectate lyase is an enzyme involved in the maceration and soft rotting of plant tissue.
BnaA07g05380D	0.88988	0.403784	2.1444	1.10057	0.0191569	0.0429028	down	chrA07:5743767-5749308:+	Probable pectate lyase 10	Pec_lyase_C	Pectate lyase. This enzyme forms a right handed beta helix structure. Pectate lyase is an enzyme involved in the maceration and soft rotting of plant tissue.
BnaA08g14630D	1.50149	3.19949	0.456245	-1.13212	9.49e-06	4.21e-05	up	chrA08:12324902-12326690:+	Probable pectate lyase 18	Pec_lyase_C	Pectate lyase. This enzyme forms a right handed beta helix structure. Pectate lyase is an enzyme involved in the maceration and soft rotting of plant tissue.
BnaA08g28010D	8.17629	16.1082	0.494495	-1.01597	8.58e-20	1.22e-18	up	chrA08:18498006-18500610:-	Probable pectate lyase 1	Pec_lyase_C	Pectate lyase. This enzyme forms a right handed beta helix structure. Pectate lyase is an enzyme involved in the maceration and soft rotting of plant tissue.
BnaC02g36790D	0.629693	1.32005	0.46503	-1.10461	0.00427001	0.0114581	up	chrC02:39832747-39835586:+	Putative pectate lyase 11	Pec_lyase_C	Pectate lyase. This enzyme forms a right handed beta helix structure. Pectate lyase is an enzyme involved in the maceration and soft rotting of plant tissue.
BnaC08g11780D	5.35948	11.9339	0.437938	-1.1912	2.68e-20	3.91e-19	up	chrC08:17031219-17032987:-	Probable pectate lyase 18	Pec_lyase_C	Pectate lyase. This enzyme forms a right handed beta helix structure. Pectate lyase is an enzyme involved in the maceration and soft rotting of plant tissue.
BnaA01g34980D	6.97087	17.3932	2.55828	1.35517	6.29965e-29	1.38816e-27	up	chrA01_random:304675-306686:+	Chitotriosidase-1	Glyco_hydro_18	Glycosyl hydrolases family 18.
BnaA03g20290D	166.844	413.807	2.54262	1.34631	0	0	up	chrA03:9648039-9649318:-	Basic endochitinase CHB4	Glyco_hydro_19	Chitinase class I.
BnaA03g20310D	37.9395	97.839	2.64446	1.40297	3.93927e-138	5.93584e-136	up	chrA03:9663327-9664876:-	Basic endochitinase CHB4	Glyco_hydro_19	Chitinase class I.
BnaA03g20340D	13.0474	38.8956	3.05611	1.61169	4.10633e-62	2.31184e-60	up	chrA03:9698939-9700499:-	Basic endochitinase CHB4	Glyco_hydro_19	Chitinase class I.
BnaA03g32280D	8.01683	22.881	2.92655	1.5492	1.54091e-58	8.04531e-57	up	chrA03:15575380-15578982:-	Endochitinase CH25	Glyco_hydro_19	Chitinase class I.
BnaA03g56430D	0.11404	1.3356	12.0458	3.59045	8.61433e-06	3.84061e-05	up	chrA03_random:711494-712848:+	Basic endochitinase CHB4	Glyco_hydro_19	Chitinase class I.
BnaA05g03420D	29.7799	129.637	4.46358	2.1582	7.4998e-308	4.04456e-305	up	chrA05:1888936-1890632:-	Basic endochitinase CHB4	Glyco_hydro_19	Chitinase class I.
BnaA05g26640D	0.122521	0.723542	6.0244	2.59082	0.00152138	0.00454157	up	chrA05:19447511-19449216:+	Endochitinase CH25	Glyco_hydro_19	Chitinase class I.
BnaA06g26630D	0.160774	1.13078	7.27111	2.86218	4.88809e-05	0.00019355	up	chrA06:18298306-18300242:-	Acidic endochitinase	Glyco_hydro_18	Glycosyl hydrolases family 18.
BnaA09g15440D	786.005	1651.83	2.15518	1.10781	0	0	up	chrA09:8979421-8980691:+	Basic endochitinase CHB4	Glyco_hydro_19	Chitinase class I.
BnaA09g34290D	1.20009	2.37415	2.02411	1.01729	0.00332908	0.00916849	up	chrA09:25164422-25167344:+	Endochitinase PR4	Glyco_hydro_19	Chitinase class I.
BnaA10g05680D	0.928148	0	0.012123	-6.36611	9.63903e-07	4.93585e-06	down	chrA10:3646850-3650151:-	Basic endochitinase CHB4	Glyco_hydro_19	Chitinase class I.
BnaC01g41020D	2.9424	19.3108	6.74281	2.75335	2.73081e-68	1.70878e-66	up	chrC01_random:240723-242688:+	Chitotriosidase-1	Glyco_hydro_18	Glycosyl hydrolases family 18.
BnaC03g19370D	0.13443	1.34746	10.2641	3.35953	6.58476e-06	2.98907e-05	up	chrC03:10063312-10065182:-	Basic endochitinase CHB4	Glyco_hydro_19	Chitinase class I.
BnaC03g24270D	45.0172	117.919	2.6863	1.42562	3.45488e-157	6.43645e-155	up	chrC03:13607893-13609216:-	Basic endochitinase CHB4	Glyco_hydro_19	Chitinase class I.
BnaC03g24290D	8.34695	47.3215	5.81432	2.53961	6.33451e-149	1.07283e-146	up	chrC03:13628566-13630189:-	Basic endochitinase CHB4	Glyco_hydro_19	Chitinase class I.
BnaC03g24360D	32.176	84.2523	2.68632	1.42563	8.77743e-99	8.44487e-97	up	chrC03:13695822-13697335:-	Basic endochitinase CHB4	Glyco_hydro_19	Chitinase class I.
BnaC03g37570D	0.945817	5.60984	6.07984	2.60403	1.74817e-19	2.44458e-18	up	chrC03:23003071-23005099:-	Endochitinase CH25	Glyco_hydro_19	Chitinase class I.
BnaC04g53030D	33.3813	203.161	6.24078	2.64173	0	0	up	chrC04_random:680771-682319:-	Basic endochitinase CHB4	Glyco_hydro_19	Chitinase class I.
BnaC09g51720D	263.863	705.719	2.74265	1.45557	0	0	up	chrC09_random:948730-950079:-	Basic endochitinase CHB4	Glyco_hydro_19	Chitinase class I.
BnaCnng39650D	8.44377	32.7932	3.98863	1.99589	6.01712e-57	3.03716e-55	up	chrCnn_random:38235388-38236682:+	Basic endochitinase CHB4	Glyco_hydro_19	Chitinase class I.

## Sheet: Table S7
Table S7 DEGs involved in phenylpropanoid pathway
Gene ID	FPKM		FoldChange	log2FC(Dwarf/Tall)	pvalue	padj	up/down	Position	Uniprot:Description	Pfam:pfam_Name	Pfam:pfam_Description
	Tall	Dwarf
BnaA01g04910D	24.3302	6.52456	0.274467	-1.8653	5.17548e-81	4.00231e-79	down	chrA01:2276046-2278899:+	Aspartate aminotransferase, chloroplastic	Aminotran_1_2	Aminotransferase class I and II.
BnaA01g09810D	1.27219	0.383489	0.306253	-1.70721	0.0117971	0.0281082	down	chrA01:4822167-4824727:-	4-coumarate--CoA ligase-like 6	AMP-binding	AMP-binding enzyme.
BnaA01g13280D	60.473	24.6946	0.418944	-1.25517	1.29122e-103	1.32636e-101	down	chrA01:6719596-6722066:+	Cystine lyase CORI3	Aminotran_1_2	Aminotransferase class I and II.
BnaA01g15410D	9.971	2.74262	0.283135	-1.82044	6.58218e-27	1.33223e-25	down	chrA01:7898158-7901519:-	Probable caffeoyl-CoA O-methyltransferase At4g26220	Methyltransf_3	O-methyltransferase. Members of this family are O-methyltransferases. The family includes catechol o-methyltransferase, caffeoyl-CoA O-methyltransferase, and a family of bacterial O-methyltransferases that may be involved in antibiotic production.
BnaA02g13470D	9.45953	3.41218	0.368613	-1.43982	1.7996e-13	1.73061e-12	down	chrA02:7418288-7420826:+	Putative caffeoyl-CoA O-methyltransferase At1g67980	Methyltransf_3	O-methyltransferase. Members of this family are O-methyltransferases. The family includes catechol o-methyltransferase, caffeoyl-CoA O-methyltransferase, and a family of bacterial O-methyltransferases that may be involved in antibiotic production.
BnaA07g25210D	33.6397	14.5771	0.444234	-1.17061	2.10233e-58	1.09209e-56	down	chrA07:18810377-18815442:+	4-coumarate--CoA ligase 3	AMP-binding	AMP-binding enzyme.
BnaC03g00110D	1.72713	0.215157	0.125897	-2.98968	8.48996e-07	4.37808e-06	down	chrC03:80684-82073:+	Macrophage migration inhibitory factor homolog	MIF	Macrophage migration inhibitory factor (MIF).
BnaC06g26980D	2.27114	0.757698	0.342958	-1.5439	1.12527e-07	6.4576e-07	down	chrC06:28473382-28478869:+	4-coumarate--CoA ligase 3	AMP-binding	AMP-binding enzyme.
BnaA02g13460D	6.59854	34.0247	5.28701	2.40245	4.36699e-85	3.58689e-83	up	chrA02:7411289-7412772:+	Putative caffeoyl-CoA O-methyltransferase At1g67980	Methyltransf_3	O-methyltransferase. Members of this family are O-methyltransferases. The family includes catechol o-methyltransferase, caffeoyl-CoA O-methyltransferase, and a family of bacterial O-methyltransferases that may be involved in antibiotic production.
BnaA03g03400D	27.8849	78.1781	2.87456	1.52334	1.23047e-199	3.1919e-197	up	chrA03:1634559-1637504:-	Aspartate aminotransferase 3, chloroplastic	Aminotran_1_2	Aminotransferase class I and II.
BnaA04g17560D	4.06229	19.741	4.98955	2.31891	5.94748e-83	4.761e-81	up	chrA04:14254342-14257981:-	Trans-cinnamate 4-monooxygenase	p450	Cytochrome P450. Cytochrome P450s are haem-thiolate proteins involved in the oxidative degradation of various compounds. They are particularly well known for their role in the degradation of environmental toxins and mutagens. They can be divided into 4 classes, according to the method by which electrons from NAD(P)H are delivered to the catalytic site. Sequence conservation is relatively low with…
BnaA07g26750D	2.71748	8.53299	3.21632	1.68541	3.36796e-14	3.4109e-13	up	chrA07:19583724-19585104:+	Putative caffeoyl-CoA O-methyltransferase At1g67980	Methyltransf_3	O-methyltransferase. Members of this family are O-methyltransferases. The family includes catechol o-methyltransferase, caffeoyl-CoA O-methyltransferase, and a family of bacterial O-methyltransferases that may be involved in antibiotic production.
BnaA09g19890D	5.35274	11.3167	2.16965	1.11747	1.43106e-20	2.12359e-19	up	chrA09:12826200-12828721:-	4-coumarate--CoA ligase-like 7	AMP-binding	AMP-binding enzyme.
BnaA09g41170D	0.451949	1.14459	2.60876	1.38336	0.00231908	0.00663406	up	chrA09:28809464-28812712:-	Probable aminotransferase TAT3	Aminotran_1_2	Aminotransferase class I and II.
BnaA09g49870D	16.7481	37.112	2.27339	1.18485	5.48756e-65	3.29302e-63	up	chrA09:33093200-33095241:+	4-hydroxyphenylpyruvate dioxygenase	Glyoxalase	Glyoxalase/Bleomycin resistance protein/Dioxygenase superfamily.
BnaA10g04310D	4.9345	15.9822	3.32282	1.73241	2.50704e-43	8.91959e-42	up	chrA10:2272334-2273834:-	4-hydroxyphenylpyruvate dioxygenase	Glyoxalase	Glyoxalase/Bleomycin resistance protein/Dioxygenase superfamily.
BnaC02g13860D	21.7934	62.4676	2.9381	1.55488	1.30779e-148	2.19677e-146	up	chrC02:9176217-9178769:-	Probable aminotransferase TAT2	Aminotran_1_2	Aminotransferase class I and II.
BnaC02g17730D	5.44684	40.155	7.55019	2.91651	3.05706e-101	3.02649e-99	up	chrC02:13334685-13336079:+	Putative caffeoyl-CoA O-methyltransferase At1g67980	Methyltransf_3	O-methyltransferase. Members of this family are O-methyltransferases. The family includes catechol o-methyltransferase, caffeoyl-CoA O-methyltransferase, and a family of bacterial O-methyltransferases that may be involved in antibiotic production.
BnaC03g04830D	2.46666	5.53202	2.30323	1.20366	1.07021e-11	9.03843e-11	up	chrC03:2339083-2342038:-	Aspartate aminotransferase 3, chloroplastic	Aminotran_1_2	Aminotransferase class I and II.
BnaC04g41120D	5.70561	27.3014	4.90476	2.29418	6.78344e-114	7.94361e-112	up	chrC04:41906136-41908681:-	Trans-cinnamate 4-monooxygenase	p450	Cytochrome P450. Cytochrome P450s are haem-thiolate proteins involved in the oxidative degradation of various compounds. They are particularly well known for their role in the degradation of environmental toxins and mutagens. They can be divided into 4 classes, according to the method by which electrons from NAD(P)H are delivered to the catalytic site. Sequence conservation is relatively low with…
BnaC05g04530D	3.0957	16.7016	5.52968	2.4672	2.72648e-64	1.61719e-62	up	chrC05:2231485-2233489:-	4-hydroxyphenylpyruvate dioxygenase	Glyoxalase	Glyoxalase/Bleomycin resistance protein/Dioxygenase superfamily.

## Sheet: Table S8
Table S8 DEGs in the candidate regions
Gene ID	FPKM		FoldChange	log2FC(Dwarf/Tall)	pvalue	padj	up/down	Position	Uniprot:Description	Pfam:pfam_Name	Pfam:pfam_Description
	Tall	Dwarf
BnaA01g00080D	1.29666	0.0389055	0.0305568	-5.03236	0.000133785	0.000491777	down	chrA01:24909-25673:+	.	Bap31	B-cell receptor-associated protein 31-like. Bap31 is a polytopic integral protein of the endoplasmic reticulum membrane and a substrate of caspase-8. Bap31 is cleaved within its cytosolic domain, generating pro-apoptotic p20 Bap31.
BnaA01g02420D	3.16916	0.29531	0.0930449	-3.42593	1.03919e-07	5.98542e-07	down	chrA01:1225690-1226301:+	Auxin-induced protein 15A	Auxin_inducible	Auxin responsive protein. This family consists of the protein products of the ARG7 auxin responsive genes family none of which have any identified functional role.
BnaA01g08060D	3.18742	0.336853	0.107271	-3.22067	1.11355e-09	7.88252e-09	down	chrA01:3816043-3817558:+	Zinc finger HIT domain-containing protein 3 (Fragment)	zf-HIT	HIT zinc finger. This presumed zinc finger contains up to 6 cysteine residues that could coordinate zinc. The domain is named after the HIT protein. This domain is also found in the Thyroid receptor interacting protein 3 (TRIP-3), which specifically interacts with the ligand binding domain of the thyroid receptor.
BnaA01g05420D	1.25299	0.127841	0.10813	-3.20916	1.2628e-06	6.36382e-06	down	chrA01:2524349-2525940:+	.	K1377	Susceptibility to monomelic amyotrophy. This family of proteins is associated with a susceptibility to monomelic amyotrophy.
BnaA01g08120D	27.1459	2.93732	0.111044	-3.17079	1.82115e-114	2.14488e-112	down	chrA01:3845659-3848204:-	GDSL esterase/lipase At4g28780	Lipase_GDSL	GDSL-like Lipase/Acylhydrolase.
BnaA01g04160D	1.44976	0.168069	0.1163	-3.10408	2.26628e-08	1.40099e-07	down	chrA01:1926874-1930331:-	.	PH_2	Plant pleckstrin homology-like region. This family describes a pleckstrin homology (PH)-like region found in several plant proteins of unknown function.
BnaA01g00020D	2.78942	0.319684	0.117724	-3.08651	1.30127e-08	8.24455e-08	down	chrA01:1487-2436:-	.	DUF3169	Protein of unknown function (DUF3169). Some members in this family of proteins are annotated as membrane proteins however this cannot be confirmed. Currently there is no known function.
BnaA01g05170D	0.788375	0.0933287	0.122996	-3.02332	0.00142766	0.00429336	down	chrA01:2422617-2423970:-	Proline-rich protein 4	Pollen_Ole_e_I	Pollen proteins Ole e I like.
BnaA01g04310D	1.00869	0.11776	0.123989	-3.01172	0.00040657	0.00136834	down	chrA01:1988812-1990696:+	.	Git3_C	G protein-coupled glucose receptor regulating Gpa2 C-term. Git3 is one of six proteins required for glucose-triggered adenylate cyclase activation, and is a G protein-coupled receptor responsible for the activation of adenylate cyclase through Gpa2 - heterotrimeric G protein alpha subunit, part of the glucose-detection pathway. Git3 contains seven predicted transmembrane domains, a third cytoplas…
BnaA01g00140D	1.92689	0.239779	0.126105	-2.9873	3.09965e-08	1.89192e-07	down	chrA01:44789-46403:-	Cinnamyl alcohol dehydrogenase 7	ADH_N	Alcohol dehydrogenase GroES-like domain. This is the catalytic domain of alcohol dehydrogenases. Many of them contain an inserted zinc binding domain. This domain has a GroES-like structure.
BnaA01g03460D	3.72668	0.456877	0.126158	-2.9867	5.68694e-19	7.71804e-18	down	chrA01:1629929-1632664:+	Histone deacetylase 14	Hist_deacetyl	Histone deacetylase domain. Histones can be reversibly acetylated on several lysine residues. Regulation of transcription is caused in part by this mechanism. Histone deacetylases catalyse the removal of the acetyl group. Histone deacetylases are related to other proteins.
BnaA01g08550D	1.19728	0.145935	0.12667	-2.98086	0.00174524	0.00513314	down	chrA01:4085413-4086183:-	.	DUF581	Protein of unknown function (DUF581). Family of uncharacterized proteins.
BnaA01g08260D	9.69393	1.21226	0.127957	-2.96627	3.17799e-24	5.70036e-23	down	chrA01:3935996-3937009:-	Photosystem II reaction center PSB28 protein, chloroplastic	Psb28	Psb28 protein. Psb28 is a 13 kDa soluble protein that is directly assembled in dimeric PSII supercomplexes. The negatively charged N-terminal region is essential for this process. This protein was formerly known as PsbW, but PsbW is now reserved for pfam07123.
BnaA01g09980D	6.58012	0.824761	0.128526	-2.95987	8.45457e-17	1.00674e-15	down	chrA01:4959722-4960845:-	.	Capsule_synth	Capsule polysaccharide biosynthesis protein. This family includes export proteins involved in capsule polysaccharide biosynthesis, such as KpsS and LipB.
BnaA01g00450D	10.781	1.3765	0.131507	-2.92679	3.6035e-28	7.73261e-27	down	chrA01:251208-252153:+	.	7TM_GPCR_Srz	Serpentine type 7TM GPCR chemoreceptor Srz. Chemoreception is mediated in Caenorhabditis elegans by members of the seven-transmembrane G-protein-coupled receptor class (7TM GPCRs) of proteins which are of the serpentine type. Srz is a solo families amongst the superfamilies of chemoreceptors. Chemoperception is one of the central senses of soil nematodes like C. elegans which are otherwise 'blind…
BnaA01g07290D	7.36757	0.950837	0.13159	-2.92588	4.80653e-16	5.46768e-15	down	chrA01:3432136-3433009:+	Uncharacterized protein At4g29660	Glyco_hydro_57	Glycosyl hydrolase family 57. This family includes alpha-amylase (EC:3.2.1.1), 4--glucanotransferase (EC:2.4.1.-) and amylopullulanase enzymes.
BnaA01g03040D	10.8695	1.4178	0.133421	-2.90594	7.10255e-29	1.56088e-27	down	chrA01:1467745-1469440:-	CBS domain-containing protein CBSX2, chloroplastic	CBS	CBS domain. CBS domains are small intracellular modules that pair together to form a stable globular domain. This family represents a single CBS domain. Pairs of these domains have been termed a Bateman domain. CBS domains have been shown to bind ligands with an adenosyl group such as AMP, ATP and S-AdoMet. CBS domains are found attached to a wide range of other protein domains suggesting that CB…
BnaA01g06470D	5.29666	0.697949	0.134331	-2.89614	6.56057e-22	1.04995e-20	down	chrA01:2992811-2994786:-	.	DUF892	Domain of unknown function (DUF892). This family consists of several hypothetical bacterial proteins of unknown function.
BnaA01g04120D	8.39866	1.12647	0.137465	-2.86286	6.81685e-26	1.31977e-24	down	chrA01:1895762-1897683:-	Serine/threonine-protein kinase Aurora-1	Pkinase	Protein kinase domain.
BnaA01g02430D	3.37718	0.455676	0.139695	-2.83965	3.49916e-09	2.3596e-08	down	chrA01:1232292-1233049:-	Indole-3-acetic acid-induced protein ARG7	Auxin_inducible	Auxin responsive protein. This family consists of the protein products of the ARG7 auxin responsive genes family none of which have any identified functional role.
BnaA01g08160D	11.1747	1.53877	0.140557	-2.83078	4.89875e-27	9.97418e-26	down	chrA01:3864644-3866157:-	Glutaredoxin-C5, chloroplastic	Glutaredoxin	Glutaredoxin.
BnaA01g03530D	1.87407	0.25976	0.144187	-2.79398	9.57726e-09	6.17094e-08	down	chrA01:1654736-1656253:-	Signal peptide peptidase-like 1	Peptidase_A22B	Signal peptide peptidase. The members of this family are membrane proteins. In some proteins this region is found associated with pfam02225. This family corresponds with Merops subfamily A22B, the type example of which is signal peptide peptidase. There is a sequence-similarity relationship with pfam01080.
BnaA01g04780D	3.98667	0.56277	0.144739	-2.78847	6.35219e-12	5.46598e-11	down	chrA01:2231491-2232692:+	Vesicle-associated membrane protein 711	Synaptobrevin	Synaptobrevin.
BnaA01g03310D	1.50596	0.216106	0.146188	-2.7741	0.00122088	0.00372508	down	chrA01:1577919-1578619:+	.	HPPK	7,8-dihydro-6-hydroxymethylpterin-pyrophosphokinase (HPPK).
BnaA01g04920D	10.6772	1.50694	0.146342	-2.77258	1.11237e-18	1.48362e-17	down	chrA01:2279076-2280770:-	60S ribosomal protein L39-1	Ribosomal_L39	Ribosomal L39 protein.
BnaA01g07220D	6.62449	0.942942	0.146702	-2.76904	8.07259e-33	2.0525e-31	down	chrA01:3406030-3407821:+	Probable polyamine oxidase 5	Amino_oxidase	Flavin containing amine oxidoreductase. This family consists of various amine oxidases, including maze polyamine oxidase (PAO) and various flavin containing monoamine oxidases (MAO). The aligned region includes the flavin binding site of these enzymes. The family also contains phytoene dehydrogenases and related enzymes. In vertebrates MAO plays an important role regulating the intracellular leve…
BnaA01g03200D	44.6847	6.41543	0.14806	-2.75574	1.7867e-208	4.81774e-206	down	chrA01:1539795-1547472:+	Fatty acyl-CoA reductase 3	NAD_binding_4	Male sterility protein. This family represents the C-terminal region of the male sterility protein in a number of arabidopsis and drosophila. A sequence-related jojoba acyl CoA reductase is also included.
BnaA01g09250D	4.68555	0.681836	0.148793	-2.74862	7.59385e-13	7.00521e-12	down	chrA01:4515430-4516740:-	D-tyrosyl-tRNA(Tyr) deacylase	Tyr_Deacylase	D-Tyr-tRNA(Tyr) deacylase. This family comprises of several D-Tyr-tRNA(Tyr) deacylase proteins. Cell growth inhibition by several d-amino acids can be explained by an in vivo production of d-aminoacyl-tRNA molecules. Escherichia coli and yeast cells express an enzyme, d-Tyr-tRNA(Tyr) deacylase, capable of recycling such d-aminoacyl-tRNA molecules into free tRNA and d-amino acid. Accordingly, upon…
BnaA01g07450D	94.7447	13.7968	0.149051	-2.74612	1.57635e-188	3.7563e-186	down	chrA01:3473967-3476138:+	60S ribosomal protein L28-2	Ribosomal_L28e	Ribosomal L28e protein family.
BnaA01g11000D	21.8708	3.25202	0.152018	-2.71769	3.88642e-33	1.00119e-31	down	chrA01:5481844-5482913:+	.	COX7a	Cytochrome c oxidase subunit VIIa. Cytochrome c oxidase, a 13 sub-unit complex, is the terminal oxidase in the mitochondrial electron transport chain. This family is composed of the heart and liver isoforms of cytochrome c oxidase subunit VIIa.
BnaA01g04270D	2.14787	0.32359	0.152956	-2.70881	1.02641e-09	7.29215e-09	down	chrA01:1971319-1973127:-	Proline-rich receptor-like protein kinase PERK14	Pkinase_Tyr	Protein tyrosine kinase.
BnaA01g01910D	6.0259	0.898831	0.153894	-2.69999	1.09225e-17	1.38084e-16	down	chrA01:970204-971701:+	WUSCHEL-related homeobox 13	Homeobox	Homeobox domain.
BnaA01g07470D	40.5943	6.04695	0.154111	-2.69796	1.09676e-45	4.16222e-44	down	chrA01:3478168-3479185:+	40S ribosomal protein S30	Ribosomal_S30	Ribosomal protein S30.
BnaA01g02470D	15.6086	2.36821	0.155886	-2.68143	1.09679e-30	2.58351e-29	down	chrA01:1251800-1253393:-	NADH dehydrogenase [ubiquinone] 1 beta subcomplex subunit 9	Complex1_LYR_1	Complex1_LYR-like. This is a family of proteins carrying the LYR motif of family Complex1_LYR, pfam05347, likely to be involved in Fe-S cluster biogenesis in mitochondria.
BnaA01g00930D	4.83863	0.737558	0.156593	-2.67491	1.5686e-15	1.7301e-14	down	chrA01:514609-516217:-	Thioredoxin-like protein HCF164, chloroplastic	Thioredoxin	Thioredoxin. Thioredoxins are small enzymes that participate in redox reactions, via the reversible oxidation of an active centre disulfide bond. Some members with only the active site are not separated from the noise.
BnaA01g07330D	13.4812	2.06228	0.156652	-2.67436	3.4041e-38	1.03733e-36	down	chrA01:3445748-3447421:+	.	DUF3456	TLR4 regulator and MIR-interacting MSAP. This family of proteins, found from plants to humans, is PRAT4 (A and B), a Protein Associated with Toll-like receptor 4. The Toll family of receptors - TLRs - plays an essential role in innate recognition of microbial products, the first line of defence against bacterial infection. PRAT4A influences the subcellular distribution and the strength of TLR res…
BnaA01g06190D	11.6094	1.78262	0.157547	-2.66615	1.15011e-55	5.63183e-54	down	chrA01:2881879-2884277:+	Omega-6 fatty acid desaturase, chloroplastic	FA_desaturase	Fatty acid desaturase.
BnaA01g05890D	15.4981	2.40624	0.158431	-2.65807	1.59861e-40	5.26693e-39	down	chrA01:2736104-2737662:-	.	Rdx	Rdx family. This entry is an approximately 100 residue region of selenoprotein-T, conserved from plants to humans. The protein binds to UDP-glucose:glycoprotein glucosyltransferase (UGTR), the endoplasmic reticulum (ER)-resident protein, which is known to be involved in the quality control of protein folding. Selenium (Se) plays an essential role in cell survival and most of the effects of Se are…
BnaA01g07930D	1.95364	0.306254	0.159154	-2.65151	5.6579e-08	3.35739e-07	down	chrA01:3745385-3747099:-	.	zf-RanBP	Zn-finger in Ran binding protein and others.
BnaA01g03800D	23.3048	3.60959	0.159164	-2.65141	1.92923e-119	2.37451e-117	down	chrA01:1760345-1764919:-	Serine/threonine-protein kinase CBK1	Pkinase	Protein kinase domain.
BnaA01g03550D	2.33763	0.365483	0.159585	-2.6476	1.37732e-23	2.38692e-22	down	chrA01:1660739-1666144:-	Protein WEAK CHLOROPLAST MOVEMENT UNDER BLUE LIGHT-like 1	WEMBL	Weak chloroplast movement under blue light. WEMBL consists of several plant proteins required for the chloroplast avoidance response under high intensity blue light. This avoidance response consists in the relocation of chloroplasts on the anticlinal side of exposed cells. Acts in association with PMI2 to maintain the velocity of chloroplast photo-relocation movement via the regulation of cp-acti…
BnaA01g10440D	0.772241	0.122725	0.161119	-2.6338	6.74895e-05	0.000261251	down	chrA01:5209677-5211381:-	.	ATPgrasp_TupA	TupA-like ATPgrasp. A member of the ATP-grasp fold predicted to be involved in the biosynthesis of cell surface polysaccharides such as the O-antigen in proteobacteria, the capsule in firmicutes and the polyglutamate chain of teichuronopeptide.
BnaA01g02880D	6.46081	1.02229	0.161212	-2.63297	4.73573e-33	1.21539e-31	down	chrA01:1410741-1413775:-	Aldehyde dehydrogenase family 3 member I1, chloroplastic	Aldedh	Aldehyde dehydrogenase family. This family of dehydrogenases act on aldehyde substrates. Members use NADP as a cofactor. The family includes the following members: The prototypical members are the aldehyde dehydrogenases EC:1.2.1.3. Succinate-semialdehyde dehydrogenase EC:1.2.1.16. Lactaldehyde dehydrogenase EC:1.2.1.22. Benzaldehyde dehydrogenase EC:1.2.1.28. Methylmalonate-semialdehyde dehydrog…
BnaA01g12540D	18.7383	2.95524	0.161943	-2.62644	1.35842e-57	6.97696e-56	down	chrA01:6297451-6299173:+	PGR5-like protein 1A, chloroplastic	zf-DNA_Pol	DNA Polymerase alpha zinc finger. The DNA Polymerase alpha zinc finger domain adopts an alpha-helix-like structure, followed by three turns, all of which involve proline. The resulting motif is a helix-turn-helix motif, in contrast to other zinc finger domains, which show anti-parallel sheet and helix conformation. Zinc binding occurs due to the presence of four cysteine residues positioned to bi…
BnaA01g07660D	0.983461	0.157248	0.162694	-2.61977	1.17401e-10	9.07886e-10	down	chrA01:3598211-3603053:-	Vacuolar protein sorting-associated protein 32 homolog 2	Snf7	Snf7. This family of proteins are involved in protein sorting and transport from the endosome to the vacuole/lysosome in eukaryotic cells. Vacuoles/lysosomes play an important role in the degradation of both lipids and cellular proteins. In order to perform this degradative function, vacuoles/lysosomes contain numerous hydrolases which have been transported in the form of inactive precursors via …
BnaA01g08150D	13.6772	2.17583	0.163376	-2.61373	3.36003e-82	2.64835e-80	down	chrA01:3861058-3864573:+	Photosystem I reaction center subunit IV A, chloroplastic	PSI_PsaE	Photosystem I reaction centre subunit IV / PsaE. PsaE is a 69 amino acid polypeptide from photosystem I present on the stromal side of the thylakoid membrane. The structure is comprised of a well-defined five-stranded beta-sheet similar to SH3 domains.
BnaA01g03100D	6.02911	0.949848	0.163998	-2.60825	2.31831e-08	1.43208e-07	down	chrA01:1499923-1500350:-	.	PSK_trans_fac	Rv0623-like transcription factor. This entry represents the Rv0623-like family of transcription factors associated with the PSK operon.
BnaA01g03150D	77.1557	12.4262	0.165492	-2.59516	6.99573e-98	6.66807e-96	down	chrA01:1515140-1516016:-	40S ribosomal protein S29	Ribosomal_S14	Ribosomal protein S14p/S29e. This family includes both ribosomal S14 from prokaryotes and S29 from eukaryotes.
BnaA01g00170D	31.4006	5.0578	0.165661	-2.5937	2.49803e-139	3.83462e-137	down	chrA01:61499-64484:+	Serine hydroxymethyltransferase 1, mitochondrial	SHMT	Serine hydroxymethyltransferase.
BnaA01g09270D	17.7708	2.87477	0.165961	-2.59109	5.05129e-71	3.33385e-69	down	chrA01:4521817-4523415:-	Magnesium-chelatase subunit ChlI-1, chloroplastic	AAA_16	AAA ATPase domain. This family of domains contain a P-loop motif that is characteristic of the AAA superfamily.
BnaA01g09640D	7.69181	1.23951	0.166121	-2.58969	2.81693e-49	1.18052e-47	down	chrA01:4731337-4735093:-	.	CIA30	Complex I intermediate-associated protein 30 (CIA30). This protein is associated with mitochondrial Complex I intermediate-associated protein 30 (CIA30) in human and mouse. The family is also present in Schizosaccharomyces pombe which does not contain the NADH dehydrogenase component of complex I, or many of the other essential subunits. This means it is possible that this family of protein may n…
BnaA01g08920D	78.0815	12.6706	0.166651	-2.5851	1.28892e-139	1.98601e-137	down	chrA01:4334069-4334964:-	60S ribosomal protein L32-1	Ribosomal_L32e	Ribosomal protein L32. This family includes ribosomal protein L32 from eukaryotes and archaebacteria.
BnaA01g08240D	2.97795	0.488724	0.166726	-2.58445	2.32982e-18	3.05666e-17	down	chrA01:3925189-3929918:-	Probable tyrosine decarboxylase 2	Pyridoxal_deC	Pyridoxal-dependent decarboxylase conserved domain.
BnaA01g09240D	3.41512	0.554898	0.167139	-2.58088	1.5439e-14	1.59633e-13	down	chrA01:4512898-4515379:+	.	EF-hand_4	Cytoskeletal-regulatory complex EF hand. This is an efhand family from the N-terminal of actin cytoskeleton-regulatory complex END3 and similar proteins from fungi and closely related species.
BnaA01g05950D	17.655	2.89224	0.167242	-2.57999	1.38942e-51	6.18314e-50	down	chrA01:2757837-2760280:-	Proteasome subunit beta type-6	Proteasome	Proteasome subunit. The proteasome is a multisubunit structure that degrades proteins. Protein degradation is an essential component of regulation because proteins can become misfolded, damaged, or unnecessary. Proteasomes and their homologues vary greatly in complexity: from HslV (heat shock locus v), which is encoded by 1 gene in bacteria, to the eukaryotic 20S proteasome, which is encoded by m…
BnaA01g11190D	45.287	7.35821	0.167371	-2.57888	1.40873e-117	1.70319e-115	down	chrA01:5568483-5569606:+	Oxygen-evolving enhancer protein 3-1, chloroplastic	PsbQ	Oxygen evolving enhancer protein 3 (PsbQ). This family consists of the plant specific oxygen evolving enhancer protein 3 (PsbQ). Photosystem II (PSII)1 is a pigment-protein complex, which consists of at least 25 different protein subunits, at present denoted PsbA-Z according to the genes that encode them. PsbQ plays an important role in the lumenal oxygen-evolving activity of PSII from higher pla…
BnaA01g00280D	11.1073	1.81644	0.167534	-2.57747	6.86437e-56	3.39377e-54	down	chrA01:141991-144581:-	Squalene epoxidase 3	SE	Squalene epoxidase. This domain is found in squalene epoxidase (SE) and related proteins which are found in taxonomically diverse groups of eukaryotes and also in bacteria. SE was first cloned from Saccharomyces cerevisiae where it was named ERG1. It contains a putative FAD binding site and is a key enzyme in the sterol biosynthetic pathway. Putative transmembrane regions are found to the protein…
BnaA01g03450D	4.21874	0.698706	0.168192	-2.57182	9.25912e-10	6.60335e-09	down	chrA01:1628238-1629813:+	.	DUF3727	Protein of unknown function (DUF3727). This domain family is found in bacteria and eukaryotes, and is approximately 100 amino acids in length.
BnaA01g00780D	6.37386	1.05257	0.169401	-2.56149	5.93965e-18	7.63621e-17	down	chrA01:458803-459943:+	Red chlorophyll catabolite reductase, chloroplastic	RCC_reductase	Red chlorophyll catabolite reductase (RCC reductase). This family consists of several red chlorophyll catabolite reductase (RCC reductase) proteins. Red chlorophyll catabolite (RCC) reductase (RCCR) and pheophorbide (Pheide) a oxygenase (PaO) catalyse the key reaction of chlorophyll catabolism, porphyrin macrocycle cleavage of Pheide a to a primary fluorescent catabolite (pFCC).
BnaA01g07810D	4.19079	0.692927	0.169517	-2.5605	5.84225e-09	3.84969e-08	down	chrA01:3704599-3705565:+	Auxin-responsive protein IAA27	AUX_IAA	AUX/IAA family. Transcription of the AUX/IAA family of genes is rapidly induced by the plant hormone auxin. Some members of this family are longer and contain an N terminal DNA binding domain. The function of this region is uncertain.
BnaA01g02540D	18.2115	3.02298	0.169637	-2.55948	1.19951e-34	3.26016e-33	down	chrA01:1272128-1273452:+	30S ribosomal protein S16	Ribosomal_S16	Ribosomal protein S16.
BnaA01g10540D	1.12453	0.184624	0.169712	-2.55884	9.94917e-08	5.74253e-07	down	chrA01:5274924-5279275:+	Alpha-ketoglutarate-dependent dioxygenase alkB homolog 6	RNase_H2-Ydr279	Ydr279p protein family (RNase H2 complex component). RNases H are enzymes that specifically hydrolyse RNA when annealed to a complementary DNA and are present in all living organisms. In yeast RNase H2 is composed of a complex of three proteins (Rnh2Ap, Ydr279p and Ylr154p), this family represents the homologues of Ydr279p. It is not known whether non yeast proteins in this family fulfil the same…
BnaA01g07430D	19.2912	3.19318	0.169893	-2.5573	1.07933e-39	3.45065e-38	down	chrA01:3470706-3471905:-	40S ribosomal protein S15a-5	Ribosomal_S8	Ribosomal protein S8.
BnaA01g06990D	3.39489	0.556223	0.17011	-2.55546	4.13651e-11	3.32429e-10	down	chrA01:3290897-3292403:+	.	DUF3169	Protein of unknown function (DUF3169). Some members in this family of proteins are annotated as membrane proteins however this cannot be confirmed. Currently there is no known function.
BnaA01g02260D	10.75	1.77746	0.170826	-2.5494	1.72187e-32	4.33407e-31	down	chrA01:1157370-1159357:-	Peptidyl-prolyl cis-trans isomerase CYP21-1	Pro_isomerase	Cyclophilin type peptidyl-prolyl cis-trans isomerase/CLD. The peptidyl-prolyl cis-trans isomerases, also known as cyclophilins, share this domain of about 109 amino acids. Cyclophilins have been found in all organisms studied so far and catalyse peptidyl-prolyl isomerization during which the peptide bond preceding proline (the peptidyl-prolyl bond) is stabilized in the cis conformation. Mammalian…
BnaA01g03650D	4.70144	0.793432	0.171709	-2.54196	6.0658e-17	7.30784e-16	down	chrA01:1718897-1720972:-	Epoxide hydrolase 4	Abhydrolase_6	Alpha/beta hydrolase family. This family contains alpha/beta hydrolase enzymes of diverse specificity.
BnaA01g02710D	1.03049	0.172064	0.171852	-2.54076	7.00049e-05	0.000270273	down	chrA01:1345967-1348413:+	EKC/KEOPS complex subunit Tprkb	CGI-121	Kinase binding protein CGI-121. CGI-121 has been shown to bind to the p53-related protein kinase (PRPK). PRPK is a novel protein kinase which binds to and induces phosphorylation of the tumor suppressor protein p53. CGI-121 is part of a conserved protein complex, KEOPS. The KEOPS complex is involved in telomere uncapping and telomere elongation. Interestingly this family also include archaeal hom…
BnaA01g01190D	36.266	6.05329	0.172052	-2.53908	6.39408e-53	2.92813e-51	down	chrA01:630012-631556:+	Random slug protein 5	CRAL_TRIO_N	CRAL/TRIO, N-terminal domain. This all-alpha domain is found to the N-terminus of pfam00650.
BnaA01g07950D	1.3576	0.225407	0.172147	-2.53828	1.15452e-05	5.056e-05	down	chrA01:3750259-3752032:-	Rac-like GTP-binding protein ARAC7	Ras	Ras family. Includes sub-families Ras, Rab, Rac, Ral, Ran, Rap Ypt1 and more. Shares P-loop motif with GTP_EFTU, arf and myosin_head. See pfam00009 pfam00025, pfam00063. As regards Rab GTPases, these are important regulators of vesicle formation, motility and fusion. They share a fold in common with all Ras GTPases: this is a six-stranded beta-sheet surrounded by five alpha-helices.
BnaA01g08300D	1.67167	0.280165	0.172499	-2.53534	1.20025e-09	8.46415e-09	down	chrA01:3948585-3951254:+	Protein PHR1-LIKE 1	Myb_CC_LHEQLE	MYB-CC type transfactor, LHEQLE motif. This family is found towards the C-terminus of Myb-CC type transcription factors, and carries a highly conserved LHEQLE sequence motif.
BnaA01g06680D	4.9891	0.847928	0.173355	-2.5282	1.01165e-10	7.87979e-10	down	chrA01:3102779-3105392:-	Chaperone protein ClpB 2	AAA_2	AAA domain (Cdc48 subfamily). This Pfam entry includes some of the AAA proteins not detected by the pfam00004 model.
BnaA01g08810D	8.29409	1.40771	0.173843	-2.52415	2.17352e-37	6.49301e-36	down	chrA01:4256372-4258249:-	.	DUF296	Domain of unknown function (DUF296). This putative domain is found in proteins that contain AT-hook motifs pfam02178, which strongly suggests a DNA-binding function for the proteins as a whole. There are three highly conserved histidine residues, eg at 117, 119 and 133 in Reut_B5223, which should be a structurally conserved metal-binding unit, based on structural comparison with known metal-bindi…
BnaA01g09470D	5.17617	0.881815	0.17411	-2.52193	1.08819e-25	2.09294e-24	down	chrA01:4640283-4642141:+	.	DUF688	Protein of unknown function (DUF688). This family contains several uncharacterized proteins found in Arabidopsis thaliana.
BnaA01g06410D	1.63273	0.280985	0.174137	-2.5217	7.3738e-06	3.32186e-05	down	chrA01:2970928-2971956:+	E3 ubiquitin-protein ligase RING1	zf-RING_2	Ring finger domain.
BnaA01g00880D	5.24948	0.90034	0.174569	-2.51813	1.21619e-20	1.81393e-19	down	chrA01:496244-497897:-	Cell division cycle-associated 7-like protein	zf-4CXXC_R1	Zinc-finger domain of monoamine-oxidase A repressor R1. R1 is a transcription factor repressor that inhibits monoamine oxidase A gene expression. This domain is a four-CXXC zinc finger putative DNA-binding domain found at the C-terminal end of R1. The domain carries 12 cysteines of which four pairs are of the CXXC type.
BnaA01g04300D	6.11933	1.04664	0.174768	-2.51649	3.13294e-15	3.38626e-14	down	chrA01:1986857-1988566:-	Two-on-two hemoglobin-3	Bac_globin	Bacterial-like globin. This family of heme binding proteins are found mainly in bacteria. However they can also be found in some protozoa and plants as well.
BnaA01g10130D	1.56193	0.266578	0.175031	-2.51431	0.0001529	0.000555713	down	chrA01:5041384-5042346:+	.	DUF677	Protein of unknown function (DUF677). This family consists of AT14A like proteins from Arabidopsis thaliana. At14a has a small domain that has sequence similarities to integrins from fungi, insects and humans. Transcripts of At14a are found in all Arabidopsis tissues and localizes partly to the plasma membrane.
BnaA01g08890D	7.83805	1.34196	0.175077	-2.51394	9.72738e-43	3.41049e-41	down	chrA01:4314468-4318372:-	Two-component response regulator-like APRR2	Response_reg	Response regulator receiver domain. This domain receives the signal from the sensor partner in bacterial two-component systems. It is usually found N-terminal to a DNA binding effector domain.
BnaA01g02850D	3.82086	0.656631	0.175923	-2.50698	6.55654e-17	7.8713e-16	down	chrA01:1396237-1398073:-	Putative defensin-like protein 230	SCRL	Plant self-incompatibility response (SCRL) protein. This family consists of several Plant self-incompatibility response (SCRL) proteins. The male component of the self-incompatibility response in Brassica has been shown to be encoded by the S locus cysteine-rich gene (SCR). SCR is related, at the sequence level, to the pollen coat protein (PCP) gene family whose members encode small, cysteine-ric…
BnaA01g12530D	2.29812	0.402248	0.17728	-2.4959	2.28648e-09	1.57264e-08	down	chrA01:6294325-6295940:-	Leucoanthocyanidin dioxygenase	DIOX_N	non-haem dioxygenase in morphine synthesis N-terminal. This is the highly conserved N-terminal region of proteins with 2-oxoglutarate/Fe(II)-dependent dioxygenase activity.
BnaA01g02920D	2.46289	0.43282	0.179988	-2.47403	3.62461e-12	3.1784e-11	down	chrA01:1428197-1429884:+	Probable carbohydrate esterase At4g34215	DUF303	Domain of unknown function (DUF303). Distribution of this domain seems limited to prokaryotes and viruses.
BnaA01g03120D	3.38721	0.597055	0.18004	-2.47361	8.55982e-15	8.98189e-14	down	chrA01:1508779-1511199:-	Armadillo repeat-containing protein 6	Neurochondrin	Neurochondrin. This family contains several eukaryotic neurochondrin proteins. Neurochondrin induces hydroxyapatite resorptive activity in bone marrow cells resistant to bafilomycin A1, an inhibitor of macrophage- and osteoclast-mediated resorption. Expression of the gene is localized to chondrocyte, osteoblast, and osteocyte in the bone and to the hippocampus and Purkinje cell layer of cerebellu…
BnaA01g06210D	3.56451	0.625648	0.180695	-2.46837	1.23355e-13	1.19949e-12	down	chrA01:2886695-2888544:+	50S ribosomal protein L21, mitochondrial	Ribosomal_L21p	Ribosomal prokaryotic L21 protein.
BnaA01g03740D	6.84227	1.20494	0.181633	-2.4609	3.57619e-20	5.19029e-19	down	chrA01:1743826-1745478:+	.	Lzipper-MIP1	Leucine-zipper of ternary complex factor MIP1. This leucine-zipper is towards the N-terminus of MIP1 proteins. These proteins, here largely from plants, are subunits of the TORC2 (rictor-mTOR) protein complex controlling cell growth and proliferation. The leucine-zipper is likely to be the region that interacts with plant MADS-box factors,
BnaA01g03600D	19.5289	3.4676	0.182745	-2.45209	3.03537e-49	1.27076e-47	down	chrA01:1682967-1684745:+	Eukaryotic translation initiation factor 3 subunit K	SAC3_GANP	SAC3/GANP/Nin1/mts3/eIF-3 p25 family. This large family includes diverse proteins involved in large complexes. The alignment contains one highly conserved negatively charged residue and one highly conserved positively charged residue that are probably important for the function of these proteins. The family includes the yeast nuclear export factor Sac3, and mammalian GANP/MCM3-associated proteins…
BnaA01g05900D	3.02364	0.540681	0.182748	-2.45207	3.18487e-15	3.44147e-14	down	chrA01:2737963-2740864:-	.	Branch	Core-2/I-Branching enzyme. This is a family of two different beta-1,6-N-acetylglucosaminyltransferase enzymes, I-branching enzyme and core-2 branching enzyme. I-branching enzyme is responsible for the production of the blood group I-antigen during embryonic development. Core-2 branching enzyme forms crucial side-chain branches in O-glycans.
BnaA01g01590D	3.01692	0.537916	0.183346	-2.44736	6.37824e-05	0.000247908	down	chrA01:847635-848283:+	.	PDH	Prephenate dehydrogenase. Members of this family are prephenate dehydrogenases EC:1.3.1.12 involved in tyrosine biosynthesis.
BnaA01g04450D	18.7325	3.33926	0.183611	-2.44528	5.36086e-37	1.58072e-35	down	chrA01:2069060-2070357:-	.	Glutaredoxin2_C	Glutaredoxin 2, C terminal domain. Glutaredoxins are a multifunctional family of glutathione-dependent disulphide oxidoreductases. Unlike other glutaredoxins, glutaredoxin 2 (Grx2) cannot reduce ribonucleotide reductase. Grx2 has significantly higher catalytic activity in the reduction of mixed disulphides with glutathione (GSH) compared with other glutaredoxins. The active site residues (Cys9-Pr…
BnaA01g05780D	7.00254	1.26664	0.184345	-2.43952	5.95553e-13	5.54002e-12	down	chrA01:2701358-2702149:-	UPF0725 protein At2g20620	Cystatin	Cystatin domain. Very diverse family. Attempts to define separate sub-families failed. Typically, either the N-terminal or C-terminal end is very divergent. But splitting into two domains would make very short families. pfam00666 are related to this family but have not been included.
BnaA01g02530D	15.0918	2.73611	0.185018	-2.43426	1.72015e-40	5.65826e-39	down	chrA01:1270475-1271575:+	.	DUF3403	Domain of unknown function (DUF3403). This domain is functionally uncharacterized. This domain is found in eukaryotes. This presumed domain is about 50 amino acids in length. This domain is found associated with pfam00069, pfam08276, pfam00954, pfam01453.
BnaA01g12060D	122.171	22.1031	0.185557	-2.43006	0	0	down	chrA01:6045519-6046713:-	Plastid lipid-associated protein 2, chloroplastic	PAP_fibrillin	PAP_fibrillin. This family identifies a conserved region found in a number of plastid lipid-associated proteins (PAPs), and in a number of putative fibrillin proteins.
BnaA01g03240D	1.97288	0.358683	0.185672	-2.42917	1.85042e-13	1.77781e-12	down	chrA01:1559338-1561787:-	.	DMP1	Dentin matrix protein 1 (DMP1). This family consists of several mammalian dentin matrix protein 1 (DMP1) sequences. The dentin matrix acidic phosphoprotein 1 (DMP1) gene has been mapped to human chromosome 4q21. DMP1 is a bone and teeth specific protein initially identified from mineralised dentin. DMP1 is primarily localized in the nuclear compartment of undifferentiated osteoblasts. In the nucl…
BnaA01g03330D	29.2855	5.32381	0.185686	-2.42906	6.4141e-39	1.99007e-37	down	chrA01:1585892-1586611:+	Costars family protein ST45-2	Costars	Costars. This domain is found both alone and at the C-terminus of actin-binding Rho-activating protein (ABRA). It binds to actin, and in muscle regulates the actin cytoskeleton and cell motility. It has a winged helix-like fold consisting of three alpha-helices and four antiparallel beta strands. Unlike typical winged helix proteins it does not bind to DNA, but contains a hydrophobic groove which…
BnaA01g01400D	16.8082	3.03378	0.185715	-2.42884	1.15924e-78	8.71788e-77	down	chrA01:744031-746343:+	Cytochrome P450 84A1	p450	Cytochrome P450. Cytochrome P450s are haem-thiolate proteins involved in the oxidative degradation of various compounds. They are particularly well known for their role in the degradation of environmental toxins and mutagens. They can be divided into 4 classes, according to the method by which electrons from NAD(P)H are delivered to the catalytic site. Sequence conservation is relatively low with…
BnaA01g03130D	4.84996	0.888261	0.185889	-2.42748	4.45676e-12	3.87823e-11	down	chrA01:1511859-1513135:-	E3 ubiquitin-protein ligase RNF170	zf-C3HC4	Zinc finger, C3HC4 type (RING finger). The C3HC4 type zinc-finger (RING finger) is a cysteine-rich domain of 40 to 60 residues that coordinates two zinc ions, and has the consensus sequence: C-X2-C-X(9-39)-C-X(1-3)-H-X(2-3)-C-X2-C-X(4-48)-C-X2-C where X is any amino acid. Many proteins containing a RING finger play a key role in the ubiquitination pathway.
BnaA01g09540D	79.0061	14.343	0.18638	-2.42368	1.9964e-153	3.54219e-151	down	chrA01:4682352-4683511:+	60S ribosomal protein L11-2	Ribosomal_L5_C	ribosomal L5P family C-terminus. This region is found associated with pfam00281.
BnaA01g01900D	37.7032	6.85626	0.186508	-2.42269	1.40562e-70	9.20298e-69	down	chrA01:966187-967475:+	High mobility group B protein 4	HMG_box	HMG (high mobility group) box.
BnaA01g02940D	42.4488	7.71938	0.187076	-2.4183	5.83114e-77	4.28306e-75	down	chrA01:1434988-1435993:+	Stress enhanced protein 1, chloroplastic	TT_ORF1	TT viral orf 1. TT virus (TTV), isolated initially from a Japanese patient with hepatitis of unknown aetiology, has since been found to infect both healthy and diseased individuals and numerous prevalence studies have raised questions about its role in unexplained hepatitis. ORF1 is a large 750 residue protein. The N-terminal half of this protein corresponds to the capsid protein.
BnaA01g11660D	10.9226	1.98505	0.18846	-2.40767	3.75311e-23	6.3643e-22	down	chrA01:5826672-5827735:-	Peptide methionine sulfoxide reductase B2, chloroplastic	SelR	SelR domain. Methionine sulfoxide reduction is an important process, by which cells regulate biological processes and cope with oxidative stress. MsrA, a protein involved in the reduction of methionine sulfoxides in proteins, has been known for four decades and has been extensively characterized with respect to structure and function. However, recent studies revealed that MsrA is only specific fo…
BnaA01g07360D	23.9039	4.45281	0.188839	-2.40477	3.89005e-37	1.15367e-35	down	chrA01:3453655-3454862:+	.	ATP-synt_G	Mitochondrial ATP synthase g subunit. The Fo sector of the ATP synthase is a membrane bound complex which mediates proton transport. It is composed of nine different polypeptide subunits (a, b, c, d, e, f, g F6, A6L). The function of subunit g is currently unknown. The conserved region covers all but the very N-terminus of the member sequences. No prokaryotic members have been identified thus far.
BnaA01g03590D	50.6868	9.3348	0.188966	-2.4038	3.32324e-221	9.79901e-219	down	chrA01:1679977-1682519:+	Cell division cycle 20.1, cofactor of APC complex	WD40	WD domain, G-beta repeat.
BnaA01g07410D	16.5465	3.03258	0.189	-2.40355	1.35989e-47	5.42713e-46	down	chrA01:3463657-3465655:+	B3 domain-containing protein REM21	B3	B3 DNA binding domain. This is a family of plant transcription factors with various roles in development, the aligned region corresponds the B3 DNA binding domain as described in this domain is found in VP1/AB13 transcription factors. Some proteins also have a second AP2 DNA binding domain pfam00847 such as RAV1. DNA binding activity was demonstrated by.
BnaA01g07890D	68.2944	12.6641	0.190469	-2.39237	1.68246e-103	1.72393e-101	down	chrA01:3731283-3731878:-	.	LZ_Tnp_IS66	Transposase C of IS166 homeodomain. This is a leucine-zipper-like or homeodomain-like region of transposase TnpC of insertion element IS66.
BnaA01g06130D	9.90309	1.87167	0.19229	-2.37865	3.24419e-21	4.99124e-20	down	chrA01:2832720-2834038:-	.	DUF1068	Protein of unknown function (DUF1068). This family consists of several hypothetical plant proteins from Arabidopsis thaliana and Oryza sativa. The function of this family is unknown.
BnaA01g08450D	24.0414	4.50374	0.192589	-2.37641	8.82322e-48	3.53844e-46	down	chrA01:4036748-4038243:-	Uncharacterized protein At4g28440	PITH	PITH domain. This family was formerly known as DUF1000. The full-length, Txnl1, protein which is a probable component of the 26S proteasome, uses its C-terminal, PITH, domain to associate specifically with the 26S proteasome. PITH derives from proteasome-interacting thioredoxin domain.
BnaA01g08480D	2.13972	0.404152	0.193155	-2.37217	2.68389e-13	2.54988e-12	down	chrA01:4044735-4047857:-	GATA transcription factor 26	ASXH	Asx homology domain. A conserved alpha helical domain with a characteristic LXXLL motif. The LXXLL motif is detected in diverse transcription factors, coactivators and corepressors and is implicated in mediating interactions between them. The ASXH domain is found in animals, fungi and plants and is predicted to play a role in mediating contact between transcription factors and chromatin-associate…
BnaA01g09400D	12.8448	2.4261	0.193557	-2.36917	9.97715e-24	1.74098e-22	down	chrA01:4606099-4607425:+	Probable inactive dual specificity protein phosphatase-like At4g18593	ABA_GPCR	Abscisic acid G-protein coupled receptor. This domain family is found in eukaryotes, and is typically between 177 and 216 amino acids in length. This family is part of the abscisic acid (ABA) G-protein coupled receptor. ABA is a stress hormone in plants.
BnaA01g08490D	4.84657	0.919939	0.193634	-2.3686	7.10526e-37	2.07715e-35	down	chrA01:4051802-4055235:-	Microtubule-associated protein TORTIFOLIA1	DUF3385	Domain of unknown function (DUF3385). This domain is functionally uncharacterized. This domain is found in eukaryotes. This presumed domain is typically between 160 to 172 amino acids in length. This domain is found associated with pfam00454, pfam02260, pfam02985, pfam02259 and pfam08771.
BnaA01g07960D	14.528	2.75517	0.194246	-2.36404	1.00905e-146	1.66762e-144	down	chrA01:3752785-3758595:-	DNA topoisomerase 2	DNA_topoisoIV	DNA gyrase/topoisomerase IV, subunit A.
BnaA01g09550D	3.79956	0.737565	0.194789	-2.36002	1.43608e-07	8.1469e-07	down	chrA01:4683571-4684545:-	.	CPT	Chloramphenicol phosphotransferase-like protein. The members of this family are all similar to chloramphenicol 3-O phosphotransferase (CPT) expressed by Streptomyces venezuelae. Chloramphenicol (Cm) is a metabolite produced by this bacterium that can inhibit ribosomal peptidyl transferase activity and therefore protein production. By transferring a phosphate group to the C-3 hydroxyl group of Cm,…
BnaA01g07200D	2.36157	0.451829	0.195016	-2.35834	1.69546e-10	1.29164e-09	down	chrA01:3389992-3396489:+	.	C1_2	C1 domain. This short domain is rich in cysteines and histidines. The pattern of conservation is similar to that found in pfam00130, therefore we have termed this domain DC1 for divergent C1 domain. This domain probably also binds to two zinc ions. The function of proteins with this domain is uncertain, however this domain may bind to molecules such as diacylglycerol (A Bateman pers. obs.). This …
BnaA01g07150D	8.27247	1.57295	0.195043	-2.35813	6.22138e-24	1.10194e-22	down	chrA01:3359960-3361210:-	WD repeat-containing protein 61	WD40	WD domain, G-beta repeat.
BnaA01g02490D	53.2877	10.1173	0.195165	-2.35724	1.27151e-136	1.87461e-134	down	chrA01:1257779-1259308:-	40S ribosomal protein S3a-2	Ribosomal_S3Ae	Ribosomal S3Ae family.
BnaA01g10570D	4.13425	0.774341	0.195227	-2.35677	7.5636e-09	4.92613e-08	down	chrA01:5284452-5286559:-	Vacuolar protein sorting-associated protein 2 homolog 2	Snf7	Snf7. This family of proteins are involved in protein sorting and transport from the endosome to the vacuole/lysosome in eukaryotic cells. Vacuoles/lysosomes play an important role in the degradation of both lipids and cellular proteins. In order to perform this degradative function, vacuoles/lysosomes contain numerous hydrolases which have been transported in the form of inactive precursors via …
BnaA01g04740D	39.848	7.61168	0.195556	-2.35434	1.29032e-100	1.27434e-98	down	chrA01:2212606-2213720:-	ATP synthase subunit b', chloroplastic	ATP-synt_B	ATP synthase B/B' CF(0). Part of the CF(0) (base unit) of the ATP synthase. The base unit is thought to translocate protons through membrane (inner membrane in mitochondria, thylakoid membrane in plants, cytoplasmic membrane in bacteria). The B subunits are thought to interact with the stalk of the CF(1) subunits. This domain should not be confused with the ab CF(1) proteins (in the head of the A…
BnaA01g02830D	13.1659	2.51166	0.195987	-2.35117	5.29222e-33	1.35567e-31	down	chrA01:1391499-1392874:+	Thioredoxin domain-containing protein 9 homolog	Phosducin	Phosducin.
BnaA01g05230D	2.4736	0.474855	0.196344	-2.34855	4.51946e-09	3.00999e-08	down	chrA01:2444220-2446942:-	Protein BASIC PENTACYSTEINE5	GAGA_bind	GAGA binding protein-like family. This family includes gbp a protein from Soybean that binds to GAGA element dinucleotide repeat DNA. It seems likely that the this domain mediates DNA binding. This putative domain contains several conserved cysteines and a histidine suggesting this may be a zinc-binding DNA interaction domain.
BnaA01g02840D	12.5306	2.40136	0.196387	-2.34823	3.93408e-31	9.41836e-30	down	chrA01:1393294-1395058:+	TIP41-like protein	TIP41	TIP41-like family. The TOR signalling pathway activates a cell-growth program in response to nutrients. TIP41 interacts with TAP42 and negatively regulates the TOR signaling pathway.
BnaA01g00610D	47.2004	9.09625	0.196583	-2.34679	7.17411e-84	5.81103e-82	down	chrA01:332614-333546:-	.	Wzy_C	O-Antigen ligase. This group of bacterial proteins is involved in the synthesis of O-antigen, a lipopolysaccharide found in the outer membrane in gram-negative bacteria. This family includes O-antigen ligases such as Escherichia coli RfaL.
BnaA01g12470D	0.93001	0.176491	0.19679	-2.34527	1.01791e-05	4.49376e-05	down	chrA01:6240031-6241980:+	Pentatricopeptide repeat-containing protein At4g22760	PPR_2	PPR repeat family. This repeat has no known function. It is about 35 amino acids long and is found in up to 18 copies in some proteins. The family appears to be greatly expanded in plants and fungi. The repeat has been called PPR.
BnaA01g04010D	13.0079	2.50566	0.197416	-2.34069	5.47723e-23	9.22308e-22	down	chrA01:1838789-1840412:-	UPF0587 protein C1orf123 homolog	DUF866	Eukaryotic protein of unknown function (DUF866). This family consists of a number of hypothetical eukaryotic proteins of unknown function with an average length of around 165 residues.
BnaA01g09180D	3.20654	0.631759	0.197632	-2.33911	9.13628e-05	0.000345634	down	chrA01:4482381-4483399:-	.	DUF2373	Uncharacterized conserved protein (DUF2373). This is the C-terminal conserved region of a family of proteins found from fungi to humans. The function is not known.
BnaA01g01600D	1.35367	0.264455	0.198102	-2.33569	9.82663e-05	0.000369771	down	chrA01:848378-849926:-	L-ascorbate peroxidase 5, peroxisomal	peroxidase	Peroxidase.
BnaA01g01430D	10.3489	1.99641	0.198296	-2.33427	2.72957e-87	2.2925e-85	down	chrA01:757393-761343:+	Probable LRR receptor-like serine/threonine-protein kinase At4g36180	Pkinase	Protein kinase domain.
BnaA01g03480D	4.07794	0.788173	0.19868	-2.33148	1.55686e-12	1.4024e-11	down	chrA01:1633890-1635679:+	ABC transporter I family member 10, chloroplastic	ABC_tran	ABC transporter. ABC transporters for a large family of proteins responsible for translocation of a variety of compounds across biological membranes. ABC transporters are the largest family of proteins in many completely sequenced bacteria. ABC transporters are composed of two copies of this domain and two copies of a transmembrane domain pfam00664. These four domains may belong to a single polyp…
BnaA01g12020D	16.7439	3.25312	0.198714	-2.33124	4.63455e-30	1.06475e-28	down	chrA01:6021958-6025815:-	Potassium channel AKT2/3	Ion_trans	Ion transport protein. This family contains Sodium, Potassium, Calcium ion channels. This family is 6 transmembrane helices in which the last two helices flank a loop which determines ion selectivity. In some sub-families (e.g. Na channels) the domain is repeated four times, whereas in others (e.g. K channels) the protein forms as a tetramer in the membrane. A bacterial structure of the protein i…
BnaA01g07050D	7.0982	1.36506	0.198956	-2.32948	4.66028e-20	6.73269e-19	down	chrA01:3326283-3327931:+	UPF0725 protein At4g29550	DUF626	Protein of unknown function (DUF626). Protein of unknown function, currently only identified in Brassicaceae.
BnaA01g10990D	7.6017	1.47387	0.199008	-2.3291	8.83139e-21	1.32733e-19	down	chrA01:5479108-5481049:-	Adrenodoxin-like protein 2, mitochondrial	Fer2	2Fe-2S iron-sulfur cluster binding domain.
BnaA01g01630D	2.61318	0.502643	0.199257	-2.32729	3.4361e-11	2.77775e-10	down	chrA01:857637-861321:+	Protein MID1-COMPLEMENTING ACTIVITY 1	PLAC8	PLAC8 family. This family includes the Placenta-specific gene 8 protein.
BnaA01g04110D	2.70995	0.534844	0.199743	-2.32378	6.9911e-13	6.46811e-12	down	chrA01:1892311-1895556:+	ATP-dependent 6-phosphofructokinase 6	PFK	Phosphofructokinase.
BnaA01g01930D	1.9678	0.387637	0.200212	-2.3204	2.43689e-06	1.1767e-05	down	chrA01:973416-975179:+	.	PIG-H	GPI-GlcNAc transferase complex, PIG-H component. PIG-H is a family of conserved proteins that complexes with three other proteins to form the GPI-GnT (glycosylphosphatidylinositol anchor biosynthesis transferase) complex. It appears to be a peripheral membrane protein facing the cytoplasm involved in the first step in GPI anchor formation.
BnaA01g05020D	13.8393	2.68277	0.200366	-2.31929	7.17774e-27	1.45063e-25	down	chrA01:2356669-2357537:-	Early nodulin-like protein 1	Cu_bind_like	Plastocyanin-like domain. This family represents a domain found in flowering plants related to the copper binding protein plastocyanin. Some members of this family may not bind copper due to the lack of key residues.
BnaA01g00940D	8.26734	1.60827	0.200739	-2.31661	1.38302e-24	2.51372e-23	down	chrA01:516416-519612:+	Protein HGV2	SHNi-TPR	SHNi-TPR. SHNi-TPR family members contain a reiterated sequence motif that is an interrupted form of TPR repeat.
BnaA01g10140D	14.5131	2.85413	0.20074	-2.3166	2.90127e-24	5.21312e-23	down	chrA01:5043429-5044835:-	.	DUF499	Protein of unknown function (DUF499). Family of uncharacterized hypothetical prokaryotic proteins.
BnaA01g03730D	7.71408	1.50438	0.200904	-2.31542	2.47076e-24	4.45127e-23	down	chrA01:1740957-1742917:-	.	NT5C	5' nucleotidase, deoxy (Pyrimidine), cytosolic type C protein (NT5C). This family consists of several 5' nucleotidase, deoxy (Pyrimidine), cytosolic type C (NT5C) proteins. 5'(3')-Deoxyribonucleotidase is a ubiquitous enzyme in mammalian cells whose physiological function is not known.
BnaA01g02370D	3.34849	0.660021	0.201651	-2.31007	3.17023e-30	7.34926e-29	down	chrA01:1201393-1207384:+	Pentatricopeptide repeat-containing protein MRL1, chloroplastic	PPR_2	PPR repeat family. This repeat has no known function. It is about 35 amino acids long and is found in up to 18 copies in some proteins. The family appears to be greatly expanded in plants and fungi. The repeat has been called PPR.
BnaA01g07060D	10.902	2.1543	0.201976	-2.30775	1.01541e-25	1.9548e-24	down	chrA01:3328087-3330101:+	.	Vert_IL3-reg_TF	Vertebrate interleukin-3 regulated transcription factor. This family includes vertebrate transcription factors, some of which are regulated by IL-3/adenovirus E4 promoter binding protein. Others were found to strongly repress transcription in a DNA-binding-site-dependent manner.
BnaA01g11860D	13.44	2.65688	0.202415	-2.30461	6.18651e-42	2.11124e-40	down	chrA01:5926067-5927360:-	.	DsbD	Cytochrome C biogenesis protein transmembrane region. This family consists of the transmembrane (i.e. non-catalytic) region of Cytochrome C biogenesis proteins also known as disulphide interchange proteins. These proteins posses a protein disulphide isomerase like domain that is not found within the aligned region of this family.
BnaA01g02220D	21.398	4.21869	0.202446	-2.30439	1.7917e-53	8.30706e-52	down	chrA01:1139263-1141135:-	Rac-like GTP-binding protein ARAC3	Ras	Ras family. Includes sub-families Ras, Rab, Rac, Ral, Ran, Rap Ypt1 and more. Shares P-loop motif with GTP_EFTU, arf and myosin_head. See pfam00009 pfam00025, pfam00063. As regards Rab GTPases, these are important regulators of vesicle formation, motility and fusion. They share a fold in common with all Ras GTPases: this is a six-stranded beta-sheet surrounded by five alpha-helices.
BnaA01g02520D	7.53504	1.48125	0.202472	-2.30421	3.29273e-33	8.49312e-32	down	chrA01:1265982-1269775:-	Squalene synthase 1	SQS_PSY	Squalene/phytoene synthase.
BnaA01g11100D	6.02595	1.18389	0.20254	-2.30372	9.95051e-18	1.26225e-16	down	chrA01:5526562-5528162:-	Pentatricopeptide repeat-containing protein At4g21190	PPR_2	PPR repeat family. This repeat has no known function. It is about 35 amino acids long and is found in up to 18 copies in some proteins. The family appears to be greatly expanded in plants and fungi. The repeat has been called PPR.
BnaA01g11600D	5.7245	1.12354	0.202722	-2.30243	4.49942e-23	7.60153e-22	down	chrA01:5794309-5796730:-	RNA pseudouridine synthase 6, chloroplastic	PseudoU_synth_2	RNA pseudouridylate synthase. Members of this family are involved in modifying bases in RNA molecules. They carry out the conversion of uracil bases to pseudouridine. This family includes RluD, a pseudouridylate synthase that converts specific uracils to pseudouridine in 23S rRNA. RluA from Escherichia coli converts bases in both rRNA and tRNA.
BnaA01g02640D	11.1051	2.20157	0.203045	-2.30013	1.6756e-46	6.47889e-45	down	chrA01:1316343-1319352:+	Cyclase-associated protein 1	CAP_C	Adenylate cyclase associated (CAP) C terminal.
BnaA01g06490D	218.873	43.5361	0.204062	-2.29292	0	0	down	chrA01:3005981-3006709:-	UPF0057 membrane protein At4g30650	Pmp3	Proteolipid membrane potential modulator. Pmp3 is an evolutionarily conserved proteolipid in the plasma membrane which, in S. pombe, is transcriptionally regulated by the Spc1 stress MAPK (mitogen-activated protein kinases) pathway. It functions to modulate the membrane potential, particularly to resist high cellular cation concentration. In eukaryotic organisms, stress-activated mitogen-activate…
BnaA01g06570D	2.11835	0.418523	0.204262	-2.29151	2.83585e-05	0.000116955	down	chrA01:3044145-3046624:-	Transmembrane protein 208 homolog	DUF788	Protein of unknown function (DUF788). This family consists of several eukaryotic proteins of unknown function.
BnaA01g08850D	3.36968	0.67016	0.204916	-2.28689	2.91788e-17	3.59244e-16	down	chrA01:4276592-4279560:-	Probable serine/threonine-protein kinase At4g35230	Pkinase	Protein kinase domain.
BnaA01g06460D	1.7221	0.347164	0.20513	-2.28539	1.25779e-08	7.98884e-08	down	chrA01:2990692-2992674:+	Eukaryotic translation initiation factor isoform 4G-2	MIF4G	MIF4G domain. MIF4G is named after Middle domain of eukaryotic initiation factor 4G (eIF4G). Also occurs in NMD2p and CBP80. The domain is rich in alpha-helices and may contain multiple alpha-helical repeats. In eIF4G, this domain binds eIF4A, eIF3, RNA and DNA.
BnaA01g09130D	2.08116	0.415128	0.205599	-2.28209	5.75537e-12	4.96714e-11	down	chrA01:4458776-4461448:+	KH domain-containing protein At4g18375	KH_1	KH domain. KH motifs bind RNA in vitro. Autoantibodies to Nova, a KH domain protein, cause paraneoplastic opsoclonus ataxia.
BnaA01g05560D	2.88255	0.580505	0.20565	-2.28174	1.16877e-10	9.04297e-10	down	chrA01:2601438-2602725:-	F-box/kelch-repeat protein At4g39590	F-box	F-box domain. This domain is approximately 50 amino acids long, and is usually found in the N-terminal half of a variety of proteins. Two motifs that are commonly found associated with the F-box domain are the leucine rich repeats (LRRs; pfam00560 and pfam07723) and the WD repeat (pfam00400). The F-box domain has a role in mediating protein-protein interactions in a variety of contexts, such as p…
BnaA01g04970D	7.67185	1.54315	0.205954	-2.2796	7.16182e-47	2.81163e-45	down	chrA01:2323535-2326441:+	U-box domain-containing protein 12	HEAT_2	HEAT repeats. This family includes multiple HEAT repeats.
BnaA01g12110D	6.12923	1.22239	0.20614	-2.27831	8.03984e-11	6.31145e-10	down	chrA01:6064257-6065579:+	Mitochondrial pyruvate carrier 2	MPC	Uncharacterized protein family (UPF0041).
BnaA01g10110D	54.9158	11.0598	0.206339	-2.27691	9.55141e-110	1.06379e-107	down	chrA01:5038004-5038914:-	Heat stress transcription factor A-2e	HSF_DNA-bind	HSF-type DNA-binding.
BnaA01g06160D	2.31586	0.465992	0.206545	-2.27547	9.88161e-08	5.70514e-07	down	chrA01:2837973-2840109:-	.	GSHPx	Glutathione peroxidase.
BnaA01g08530D	15.4418	3.11141	0.206728	-2.2742	1.08409e-47	4.33913e-46	down	chrA01:4079870-4081741:+	Casein kinase II subunit beta-2	CK_II_beta	Casein kinase II regulatory subunit.
BnaA01g06330D	45.0679	9.09724	0.206848	-2.27336	5.12513e-204	1.34653e-201	down	chrA01:2916476-2919469:-	Serine carboxypeptidase-like 29	Peptidase_S10	Serine carboxypeptidase.
BnaA01g09110D	3.07218	0.616382	0.206963	-2.27255	3.4747e-09	2.34426e-08	down	chrA01:4455769-4457290:+	Protease Do-like 5, chloroplastic	Trypsin_2	Trypsin-like peptidase domain. This family includes trypsin like peptidase domains.
BnaA01g08280D	1.9516	0.397874	0.207116	-2.27149	5.46233e-07	2.89063e-06	down	chrA01:3942360-3944177:-	Auxin-responsive protein IAA11	AUX_IAA	AUX/IAA family. Transcription of the AUX/IAA family of genes is rapidly induced by the plant hormone auxin. Some members of this family are longer and contain an N terminal DNA binding domain. The function of this region is uncertain.
BnaA01g12450D	10.0606	2.02614	0.207233	-2.27068	3.17224e-31	7.61673e-30	down	chrA01:6229382-6231441:-	Methylsterol monooxygenase 1-2	FA_hydroxylase	Fatty acid hydroxylase superfamily. This superfamily includes fatty acid and carotene hydroxylases and sterol desaturases. Beta-carotene hydroxylase is involved in zeaxanthin synthesis by hydroxylating beta-carotene, but the enzyme may be involved in other pathways. This family includes C-5 sterol desaturase and C-4 sterol methyl oxidase. Members of this family are involved in cholesterol biosynt…
BnaA01g03430D	4.97958	1.00201	0.207327	-2.27002	5.14865e-19	7.00374e-18	down	chrA01:1624374-1626371:+	Aspartic proteinase Asp1	TAXi_N	Xylanase inhibitor N-terminal. The N- and C-termini of the members of this family are jointly necessary for creating the catalytic pocket necessary for cleaving xylanase. Phytopathogens produce xylanase that destroys plant cells, so its destruction through proteolysis is vital for plant-survival.
BnaA01g05390D	32.9498	6.67847	0.207545	-2.2685	2.01317e-48	8.23471e-47	down	chrA01:2517652-2518544:+	40S ribosomal protein S25-4	Ribosomal_S25	S25 ribosomal protein.
BnaA01g12120D	1.61872	0.320412	0.207905	-2.266	0.00258546	0.00731366	down	chrA01:6069514-6070790:+	Mitochondrial pyruvate carrier 2	MPC	Uncharacterized protein family (UPF0041).
BnaA01g01570D	41.8715	8.49739	0.208038	-2.26508	7.5712e-133	1.05909e-130	down	chrA01:843496-845460:+	Thaumatin-like protein 1	Thaumatin	Thaumatin family.
BnaA01g08680D	7.52212	1.53301	0.208161	-2.26423	1.13134e-19	1.60115e-18	down	chrA01:4163481-4164859:+	Uncharacterized membrane protein At4g09580	SNARE_assoc	SNARE associated Golgi protein. This is a family of SNARE associated Golgi proteins. The yeast member of this family localizes with the t-SNARE Tlg2.
BnaA01g06220D	6.48353	1.31361	0.208304	-2.26324	3.02588e-33	7.80974e-32	down	chrA01:2888743-2891632:+	Leucine aminopeptidase 2, chloroplastic	Peptidase_M17	Cytosol aminopeptidase family, catalytic domain. The two associated zinc ions and the active site are entirely enclosed within the C-terminal catalytic domain in leucine aminopeptidase.
BnaA01g06250D	4.38756	0.896413	0.208461	-2.26215	2.26532e-27	4.67976e-26	down	chrA01:2894471-2897617:+	Ubiquitin carboxyl-terminal hydrolase 24	UCH	Ubiquitin carboxyl-terminal hydrolase.
BnaA01g04430D	8.60103	1.76879	0.209449	-2.25533	7.35563e-20	1.05265e-18	down	chrA01:2064584-2066113:+	Mitochondrial acidic protein mam33	MAM33	Mitochondrial glycoprotein. This mitochondrial matrix protein family contains members of the MAM33 family which bind to the globular 'heads' of C1Q. It is thought to be involved in mitochondrial oxidative phosphorylation and in nucleus-mitochondrion interactions.
BnaA01g10740D	2.2637	0.460379	0.209613	-2.2542	1.87931e-10	1.42481e-09	down	chrA01:5351767-5353416:+	Cannabidiolic acid synthase-like 1	FAD_binding_4	FAD binding domain. This family consists of various enzymes that use FAD as a co-factor, most of the enzymes are similar to oxygen oxidoreductase. One of the enzymes Vanillyl-alcohol oxidase (VAO) has a solved structure, the alignment includes the FAD binding site, called the PP-loop, between residues 99-110. The FAD molecule is covalently bound in the known structure, however the residue that li…
BnaA01g04460D	8.0237	1.64857	0.20979	-2.25299	8.01993e-27	1.61924e-25	down	chrA01:2071675-2073881:+	Protein TIFY 8	tify	tify domain. This short possible domain is found in a variety of plant transcription factors that contain GATA domains as well as other motifs. Although previously known as the Zim domain this is now called the tify domain after its most conserved amino acids. TIFY proteins can be further classified into two groups depending on the presence (group I) or absence (group II) of a C2C2-GATA domain. F…
BnaA01g04680D	8.55045	1.75322	0.209935	-2.25199	3.394e-25	6.37811e-24	down	chrA01:2190444-2192067:-	.	FLO_LFY	Floricaula / Leafy protein. This family consists of various plant development proteins which are homologues of floricaula (FLO) and Leafy (LFY) proteins which are floral meristem identity proteins. Mutations in the sequences of these proteins affect flower and leaf development.
BnaA01g00860D	3.86755	0.794649	0.210398	-2.2488	1.95749e-08	1.21652e-07	down	chrA01:488638-490056:+	.	Trichoplein	tumor suppressor, Mitostatin. Trichoplein or mitostatin, was first defined as a meiosis-specific nuclear structural protein. It has since been linked with mitochondrial movement. It is associated with the mitochondrial outer membrane, and over-expression leads to reduction in mitochondrial motility whereas lack of it enhances mitochondrial movement. The activity appears to be mediated through bin…
BnaA01g11670D	4.48998	0.921982	0.210445	-2.24849	9.48049e-11	7.39987e-10	down	chrA01:5828300-5829310:-	15.4 kDa class V heat shock protein	HSP20	Hsp20/alpha crystallin family.
BnaA01g08750D	3.45415	0.716057	0.210527	-2.24793	5.45102e-18	7.02565e-17	down	chrA01:4227372-4229479:-	Transcription factor MYC4	bHLH-MYC_N	bHLH-MYC and R2R3-MYB transcription factors N-terminal. This is the N-terminal region of a family of MYB and MYC transcription factors. The DNA-binding HLH domain is further downstream, pfam00010. Members of the MYB and MYC family regulate the biosynthesis of phenylpropanoids in several plant species (DOI:10.1007/s11295-009-0232-y).
BnaA01g02340D	246.28	50.6074	0.210796	-2.24608	0	0	down	chrA01:1189251-1189918:-	Peptidyl-prolyl cis-trans isomerase CYP18-4	Pro_isomerase	Cyclophilin type peptidyl-prolyl cis-trans isomerase/CLD. The peptidyl-prolyl cis-trans isomerases, also known as cyclophilins, share this domain of about 109 amino acids. Cyclophilins have been found in all organisms studied so far and catalyse peptidyl-prolyl isomerization during which the peptide bond preceding proline (the peptidyl-prolyl bond) is stabilized in the cis conformation. Mammalian…
BnaA01g10340D	7.73238	1.58672	0.210981	-2.24481	1.34305e-18	1.78548e-17	down	chrA01:5164131-5165793:-	Uncharacterized N-acetyltransferase ycf52	Acetyltransf_1	Acetyltransferase (GNAT) family. This family contains proteins with N-acetyltransferase functions such as Elp3-related proteins.
BnaA01g06100D	6.50988	1.34007	0.21114	-2.24373	4.53448e-27	9.2555e-26	down	chrA01:2823027-2825443:+	Chloroplast envelope membrane protein	CemA	CemA family. Members of this family are probable integral membrane proteins. Their molecular function is unknown. CemA proteins are found in the inner envelope membrane of chloroplasts but not in the thylakoid membrane. A cyanobacterial member of this family has been implicated in CO2 transport, but is probably not a CO2 transporter itself. They are predicted to be haem-binding however this has n…
BnaA01g08360D	5.81038	1.19107	0.211539	-2.24101	2.52998e-17	3.12425e-16	down	chrA01:4012067-4014097:+	Prohibitin-1, mitochondrial	Band_7	SPFH domain / Band 7 family. This family has been called SPFH, Band 7 or PHB domain. Recent phylogenetic analysis has shown this domain to be a slipin or Stomatin-like integral membrane domain conserved from protozoa to mammals.
BnaA01g00380D	5.05846	1.04489	0.212132	-2.23696	1.3629e-33	3.58535e-32	down	chrA01:211060-214623:-	Formamidase	FmdA_AmdA	Acetamidase/Formamidase family. This family includes amidohydrolases of formamide EC:3.5.1.49 and acetamide. Methylophilus methylotrophus fmdA forms a homotrimer suggesting all the members of this family also do.
BnaA01g02050D	17.3399	3.57796	0.212205	-2.23647	4.85687e-55	2.33096e-53	down	chrA01:1025746-1028196:+	Uncharacterized protein At2g17340	DUF89	Protein of unknown function DUF89. This family has no known function.
BnaA01g02440D	5.76653	1.19569	0.212359	-2.23542	6.68733e-37	1.95916e-35	down	chrA01:1234298-1237975:+	Amidophosphoribosyltransferase 2, chloroplastic	GATase_2	Glutamine amidotransferases class-II.
BnaA01g01330D	14.4292	2.98409	0.212852	-2.23208	1.16139e-118	1.41669e-116	down	chrA01:699955-705111:+	Beta-galactosidase 3	Glyco_hydro_35	Glycosyl hydrolases family 35.
BnaA01g07860D	39.2481	8.16566	0.21313	-2.23019	5.15674e-139	7.85703e-137	down	chrA01:3720304-3722721:-	26S proteasome regulatory subunit 4 homolog A	AAA	ATPase family associated with various cellular activities (AAA). AAA family proteins often perform chaperone-like functions that assist in the assembly, operation, or disassembly of protein complexes.
BnaA01g07540D	11.9186	2.4873	0.213456	-2.22799	1.89755e-33	4.96001e-32	down	chrA01:3506804-3514280:-	Derlin-1	DER1	Der1-like family. The endoplasmic reticulum (ER) of the yeast Saccharomyces cerevisiae contains of proteolytic system able to selectively degrade misfolded lumenal secretory proteins. For examination of the components involved in this degradation process, mutants were isolated. They could be divided into four complementation groups. The mutations led to stabilisation of two different substrates f…
BnaA01g04340D	12.9324	2.70381	0.214278	-2.22244	4.29377e-47	1.70033e-45	down	chrA01:2005607-2008608:-	Serine/threonine-protein kinase AFC3	Pkinase	Protein kinase domain.
BnaA01g06170D	2.61236	0.542955	0.214958	-2.21788	6.43508e-09	4.21997e-08	down	chrA01:2841642-2844153:+	Transcription factor bHLH69	HLH	Helix-loop-helix DNA-binding domain.
BnaA01g07830D	15.9748	3.35344	0.215073	-2.2171	9.44873e-120	1.17353e-117	down	chrA01:3707418-3711315:-	Elongation factor Ts	EF_TS	Elongation factor TS.
BnaA01g04540D	17.8824	3.74542	0.215086	-2.21701	1.99146e-33	5.19885e-32	down	chrA01:2119904-2121869:+	Cytochrome b-c1 complex subunit 7-1	UCR_14kD	Ubiquinol-cytochrome C reductase complex 14kD subunit. The ubiquinol-cytochrome C reductase complex (cytochrome bc1 complex) is a respiratory multienzyme complex. This Pfam family represents the 14kD (or VI) subunit of the complex which is not directly involved in electron transfer, but has a role in assembly of the complex.
BnaA01g09290D	5.53679	1.16236	0.215465	-2.21448	1.27948e-21	2.01e-20	down	chrA01:4536134-4538019:-	.	NYN	NYN domain. These domains are found in the eukaryotic proteins typified by the Nedd4-binding protein 1 and the bacterial YacP-like proteins (Nedd4-BP1, YacP nucleases; NYN domains). The NYN domain shares a common protein fold with two other previously characterized groups of nucleases, namely the PIN (PilT N-terminal) and FLAP/5' --> 3' exonuclease superfamilies. These proteins share a common set…
BnaA01g07940D	3.73055	0.786822	0.21556	-2.21384	1.28834e-16	1.51692e-15	down	chrA01:3747615-3749649:-	Cyclin-dependent kinase F-1	Pkinase	Protein kinase domain.
BnaA01g04720D	4.51785	0.943271	0.215926	-2.21139	1.77173e-10	1.34624e-09	down	chrA01:2207712-2208960:+	U11/U12 small nuclear ribonucleoprotein 25 kDa protein	DUF1741	Domain of unknown function (DUF1741). This is a eukaryotic domain of unknown function.
BnaA01g00770D	32.9441	6.96137	0.21635	-2.20856	1.09802e-155	1.99129e-153	down	chrA01:448931-452159:-	CLK4-associating serine/arginine rich protein	DRY_EERY	Alternative splicing regulator. This entry represents the conserved N-terminal region of SWAP (suppressor-of-white-apricot protein) proteins. This region contains two highly conserved motifs, viz: DRY and EERY, which appear to be the sites for alternative splicing of exons 2 and 3 of the SWAP mRNA. These proteins are thus thought to be involved in auto-regulation of pre-mRNA splicing. Most family…
BnaA01g12190D	46.0651	9.70394	0.216387	-2.20832	6.818e-83	5.44722e-81	down	chrA01:6093982-6094912:-	NHP2-like protein 1	Ribosomal_L7Ae	Ribosomal protein L7Ae/L30e/S12e/Gadd45 family. This family includes: Ribosomal L7A from metazoa, Ribosomal L8-A and L8-B from fungi, 30S ribosomal protein HS6 from archaebacteria, 40S ribosomal protein S12 from eukaryotes, Ribosomal protein L30 from eukaryotes and archaebacteria. Gadd45 and MyD118.
BnaA01g07640D	5.94528	1.25315	0.216905	-2.20486	2.64269e-10	1.97901e-09	down	chrA01:3593497-3595193:-	Vacuolar protein sorting-associated protein 32 homolog 2	Snf7	Snf7. This family of proteins are involved in protein sorting and transport from the endosome to the vacuole/lysosome in eukaryotic cells. Vacuoles/lysosomes play an important role in the degradation of both lipids and cellular proteins. In order to perform this degradative function, vacuoles/lysosomes contain numerous hydrolases which have been transported in the form of inactive precursors via …
BnaA01g02500D	2.33056	0.494616	0.216992	-2.20429	7.69137e-10	5.52371e-09	down	chrA01:1259659-1262489:+	.	SH3_9	Variant SH3 domain.
BnaA01g04030D	8.18829	1.74478	0.218248	-2.19596	3.57816e-43	1.26864e-41	down	chrA01:1850289-1854174:-	Nuclear pore complex protein NUP85	Nucleopor_Nup85	Nup85 Nucleoporin. A family of nucleoporins conserved from yeast to human. THe nuclear pore complex is a large assembly composed of two essential complexes: the heptameric Nup84 complex and the heteromeric Nic96-containing complex. The Nup84 complex is composed of one copy each of Nup84, Nup85, Nup120, Nup133, Nup145C, Sec13, and Seh1. The structure of a complex of Nup85 and Seh1 was solved. The …
BnaA01g10200D	1.8452	0.389222	0.21839	-2.19502	5.04961e-09	3.34946e-08	down	chrA01:5067699-5069654:+	.	mTERF	mTERF. This family contains one sequence of known function Human mitochondrial transcription termination factor (mTERF) the rest of the family consists of hypothetical proteins none of which have any functional information. mTERF is a multizipper protein possessing three putative leucine zippers one of which is bipartite. The protein binds DNA as a monomer. The leucine zippers are not implicated …
BnaA01g02060D	3.10329	0.672362	0.218593	-2.19368	3.63858e-09	2.44717e-08	down	chrA01:1028246-1029663:-	Cysteine protease XCP1	Peptidase_C1	Papain family cysteine protease.
BnaA01g04610D	3.81411	0.80833	0.218599	-2.19364	1.87836e-16	2.18898e-15	down	chrA01:2153173-2155182:-	Adenine nucleotide transporter BT1, chloroplastic/mitochondrial	Mito_carr	Mitochondrial carrier protein.
BnaA01g07820D	5.44388	1.15983	0.218885	-2.19176	8.5512e-15	8.97515e-14	down	chrA01:3705726-3707348:-	.	Phospholip_A2_1	Phospholipase A2. Phospholipase A2 releases fatty acids from the second carbon group of glycerol. Perhaps the best known members are secreted snake venoms, but also found in secreted pancreatic and membrane-associated forms. Structure is all-alpha, with two core disulfide-linked helices and a calcium-binding loop. This alignment represents the major family of PLA2s. A second minor family, defined…
BnaA01g04150D	1.06412	0.224686	0.218945	-2.19136	0.00218535	0.00629526	down	chrA01:1920679-1921631:-	Ethylene-responsive transcription factor ERF043	AP2	AP2 domain. This 60 amino acid residue domain can bind to DNA and is found in transcription factor proteins.
BnaA01g11450D	2.83682	0.617712	0.220785	-2.17929	4.59132e-08	2.75117e-07	down	chrA01:5684270-5686206:+	Endonuclease 4	S1-P1_nuclease	S1/P1 Nuclease. This family contains both S1 and P1 nucleases (EC:3.1.30.1) which cleave RNA and single stranded DNA with no base specificity.
BnaA01g10550D	48.0472	10.3766	0.221105	-2.17719	1.03407e-122	1.32032e-120	down	chrA01:5279389-5280996:+	Elongation factor Tu, chloroplastic	GTP_EFTU_D3	Elongation factor Tu C-terminal domain. Elongation factor Tu consists of three structural domains, this is the third domain. This domain adopts a beta barrel structure. This the third domain is involved in binding to both charged tRNA and binding to EF-Ts pfam00889.
BnaA01g02810D	19.7142	4.23807	0.221173	-2.17675	5.25308e-34	1.4008e-32	down	chrA01:1385740-1386893:-	Protein TRI1	SWIB	SWIB/MDM2 domain. This family includes the SWIB domain and the MDM2 domain. The p53-associated protein (MDM2) is an inhibitor of the p53 tumor suppressor gene binding the transactivation domain and down regulating the ability of p53 to activate transcription. This family contains the p53 binding domain of MDM2.
BnaA01g12360D	5.83462	1.25269	0.221178	-2.17672	3.72558e-20	5.40136e-19	down	chrA01:6173050-6175466:+	FAM10 family protein At4g22670	TPR_11	TPR repeat.
BnaA01g08930D	1.89306	0.410754	0.221457	-2.1749	1.15368e-10	8.93683e-10	down	chrA01:4336239-4339607:+	Protein MEI2-like 3	RRM_2	RNA recognition motif 2.
BnaA01g11950D	4.261	0.919342	0.221485	-2.17472	1.4525e-12	1.31186e-11	down	chrA01:5999378-6000805:-	Plant UBX domain-containing protein 5	SEP	SEP domain. The SEP domain is named after Saccharomyces cerevisiae Shp1, Drosophila melanogaster eyes closed gene (eyc), and vertebrate p47. In p47, the SEP domain has been shown to bind to and inhibit the cysteine protease cathepsin L. Most SEP domains are succeeded closely by a UBX domain.
BnaA01g03210D	2.73545	0.589128	0.221641	-2.1737	5.22291e-06	2.40821e-05	down	chrA01:1548682-1549552:+	.	Hint	Hint module. This is an alignment of the Hint module in the Hedgehog proteins. It does not include any Inteins which also possess the Hint module.
BnaA01g05920D	6.54582	1.4175	0.2217	-2.17332	4.05578e-30	9.35982e-29	down	chrA01:2743000-2746933:-	.	Tropomyosin_1	Tropomyosin like. This family is a set of eukaryotic tropomyosins. Within the yeast Tmp1 and Tmp2, biochemical and sequence analyses indicate that Tpm2p spans four actin monomers along a filament, whereas Tpmlp spans five. Despite its shorter length, Tpm2p can compete with Tpm1p for binding to F-actin. Over-expression of Tpm2p in vivo alters the axial budding of haploids to a bipolar pattern, and…
BnaA01g11540D	6.1893	1.33445	0.221709	-2.17326	4.30357e-12	3.7497e-11	down	chrA01:5758832-5760623:+	.	RdRP_5	Reovirus RNA-dependent RNA polymerase lambda 3. The sequences in this family are similar to the reoviral minor core protein lambda 3, which functions as a RNA-dependent RNA polymerase within the protein capsid. It is organized into 3 domains. N- and C-terminal domains create a 'cage' that encloses a conserved central catalytic domain within a hollow centre; this catalytic domain is arranged to fo…
BnaA01g11780D	1.84725	0.39936	0.221709	-2.17326	8.5989e-10	6.15499e-09	down	chrA01:5881094-5884212:+	.	Rep_fac-A_C	Replication factor-A C terminal domain. This domain is found at the C terminal of replication factor A. Replication factor A (RPA) binds single-stranded DNA and is involved in replication, repair, and recombination of DNA.
BnaA01g07130D	6.68327	1.46734	0.222083	-2.17083	7.79033e-12	6.65474e-11	down	chrA01:3356465-3357885:+	Transmembrane protein 230	DUF872	Eukaryotic protein of unknown function (DUF872). This family consists of several uncharacterized eukaryotic proteins. The function of this family is unknown.
BnaA01g04700D	20.0101	4.34911	0.222413	-2.16869	6.62324e-108	7.27775e-106	down	chrA01:2195320-2197860:-	Probable clathrin assembly protein At4g32285	ANTH	ANTH domain. AP180 is an endocytotic accessory proteins that has been implicated in the formation of clathrin-coated pits. The domain is involved in phosphatidylinositol 4,5-bisphosphate binding and is a universal adaptor for nucleation of clathrin coats.
BnaA01g05240D	3.50576	0.763267	0.224214	-2.15705	5.47344e-29	1.21066e-27	down	chrA01:2447624-2452258:-	Kinesin-like protein KIN-7A	Kinesin	Kinesin motor domain.
BnaA01g02510D	1.00529	0.220283	0.224423	-2.1557	0.000280496	0.000973034	down	chrA01:1262847-1265371:-	Squalene synthase 1	SQS_PSY	Squalene/phytoene synthase.
BnaA01g02610D	4.43162	0.973079	0.224942	-2.15237	9.03918e-12	7.67993e-11	down	chrA01:1304663-1306004:-	Probable pinoresinol-lariciresinol reductase 3	NmrA	NmrA-like family. NmrA is a negative transcriptional regulator involved in the post-translational modification of the transcription factor AreA. NmrA is part of a system controlling nitrogen metabolite repression in fungi. This family only contains a few sequences as iteration results in significant matches to other Rossmann fold families.
BnaA01g07980D	4.07349	0.900007	0.22517	-2.15091	1.56059e-17	1.95664e-16	down	chrA01:3771930-3774183:+	AFP homolog 2	DUF1675	Protein of unknown function (DUF1675). The members of this family are sequences derived from hypothetical plant proteins of unknown function. One member of this family is annotated as a putative RNA-binding protein, but no evidence was found to support this.
BnaA01g08620D	4.45187	0.977803	0.225344	-2.1498	7.584e-16	8.4998e-15	down	chrA01:4139775-4141518:-	.	RRM_6	RNA recognition motif (a.k.a. RRM, RBD, or RNP domain).
BnaA01g06440D	142.406	31.3496	0.225379	-2.14957	0	0	down	chrA01:2980759-2982419:-	.	Herpes_UL37_1	Herpesvirus UL37 tegument protein. UL37 interacts with UL36, which is thought to be an important early step in tegumentation during virion morphogenesis in the cytoplasm.
BnaA01g05810D	2.41006	0.530605	0.225459	-2.14906	8.45234e-12	7.19924e-11	down	chrA01:2706555-2710051:-	.	Glyco_transf_22	Alg9-like mannosyltransferase family. Members of this family are mannosyltransferase enzymes. At least some members are localized in endoplasmic reticulum and involved in GPI anchor biosynthesis.
BnaA01g11920D	5.06028	1.11417	0.225774	-2.14705	5.06836e-27	1.03093e-25	down	chrA01:5970386-5973641:-	Calcium permeable stress-gated cation channel 1	DUF221	Domain of unknown function DUF221. This family consists of hypothetical transmembrane proteins none of which have any function, the aligned region is at 538 residues at maximum length.
BnaA01g03860D	40.1717	8.86272	0.226218	-2.14421	0	0	down	chrA01:1786289-1791034:+	Glycine dehydrogenase (decarboxylating) 1, mitochondrial	GDC-P	Glycine cleavage system P-protein. This family consists of Glycine cleavage system P-proteins EC:1.4.4.2 from bacterial, mammalian and plant sources. The P protein is part of the glycine decarboxylase multienzyme complex EC:2.1.2.10 (GDC) also annotated as glycine cleavage system or glycine synthase. GDC consists of four proteins P, H, L and T. The reaction catalysed by this protein is:- Glycine …
BnaA01g07320D	1.89506	0.423555	0.227013	-2.13915	4.49642e-07	2.40274e-06	down	chrA01:3442572-3445440:-	Inorganic pyrophosphatase 3	Put_Phosphatase	Putative Phosphatase. This family contains a number of putative eukaryotic acid phosphatases. Some family members represent the products of the PSI14 phosphatase family in Lycopersicon esculentum (Tomato).
BnaA01g11620D	11.5494	2.5596	0.227477	-2.13621	2.67928e-33	6.93701e-32	down	chrA01:5811722-5814316:+	Tobamovirus multiplication protein 1	DUF1084	Protein of unknown function (DUF1084). This family consists of several hypothetical plant specific proteins of unknown function.
BnaA01g02100D	8.67613	1.92038	0.227586	-2.13552	3.02414e-56	1.51525e-54	down	chrA01:1041395-1044953:+	Monosaccharide-sensing protein 2	Sugar_tr	Sugar (and other) transporter.
BnaA01g02910D	3.94158	0.868955	0.227708	-2.13474	1.35935e-21	2.13139e-20	down	chrA01:1425014-1427569:+	Receptor protein kinase-like protein At4g34220	Pkinase	Protein kinase domain.
BnaA01g09880D	18.8245	4.17494	0.227725	-2.13463	5.84666e-35	1.60503e-33	down	chrA01:4869265-4870502:-	Putative ankyrin repeat protein RF_0381	Ank_2	Ankyrin repeats (3 copies).
BnaA01g08130D	6.33959	1.4214	0.22787	-2.13372	3.10649e-14	3.15233e-13	down	chrA01:3850633-3852150:+	Tetraspanin-20	Tetraspannin	Tetraspanin family.
BnaA01g07110D	6.98792	1.53948	0.22824	-2.13138	2.13375e-13	2.04522e-12	down	chrA01:3352659-3353427:-	Oligosaccharyltransferase complex subunit OSTC	OST3_OST6	OST3 / OST6 family. The proteins in this family are part of a complex of eight ER proteins that transfers core oligosaccharide from dolichol carrier to Asn-X-Ser/Thr motifs. This family includes both OST3 and OST6, each of which contains four predicted transmembrane helices. Disruption of OST3 and OST6 leads to a defect in the assembly of the complex. Hence, the function of these genes seems to b…
BnaA01g01310D	5.63697	1.2541	0.228345	-2.13071	2.08131e-25	3.95661e-24	down	chrA01:681638-685079:+	CDK5RAP1-like protein	UPF0004	Uncharacterized protein family UPF0004. This family is the N terminal half of the Prosite family. The C-terminal half has been shown to be related to MiaB proteins. This domain is a nearly always found in conjunction with pfam04055 and pfam01938 although its function is uncertain.
BnaA01g05110D	15.205	3.37641	0.228446	-2.13008	2.08541e-32	5.22448e-31	down	chrA01:2398030-2400415:+	Transcription initiation factor TFIID subunit 10	TFIID_30kDa	Transcription initiation factor TFIID 23-30kDa subunit.
BnaA01g02160D	10.3235	2.31075	0.2286	-2.1291	5.42746e-35	1.49195e-33	down	chrA01:1067319-1069586:+	Isocitrate dehydrogenase [NAD] regulatory subunit 1, mitochondrial	Iso_dh	Isocitrate/isopropylmalate dehydrogenase.
BnaA01g07460D	3.18043	0.706391	0.229295	-2.12473	2.52907e-09	1.73107e-08	down	chrA01:3476322-3477988:-	.	DUF3531	Protein of unknown function (DUF3531). This family of proteins is functionally uncharacterized. This protein is found in bacteria and eukaryotes. Proteins in this family are typically between 149 to 199 amino acids in length.
BnaA01g02950D	12.0891	2.70596	0.229702	-2.12216	8.39887e-48	3.37156e-46	down	chrA01:1436042-1439972:-	V-type proton ATPase subunit H	V-ATPase_H_N	V-ATPase subunit H. The yeast Saccharomyces cerevisiae vacuolar H+-ATPase (V-ATPase) is a multisubunit complex responsible for acidifying organelles. It functions as an ATP dependent proton pump that transports protons across a lipid bilayer. This domain corresponds to the N terminal domain of the H subunit of V-ATPase. The N-terminal domain is required for the activation of the complex whereas t…
BnaA01g03050D	7.18776	1.6151	0.229718	-2.12207	1.74435e-39	5.52076e-38	down	chrA01:1469887-1473466:-	Polyadenylate-binding protein 2	PABP	Poly-adenylate binding protein, unique domain. The region featured in this family is found towards the C-terminus of poly(A)-binding proteins (PABPs). These are eukaryotic proteins that, through their binding of the 3' poly(A) tail on mRNA, have very important roles in the pathways of gene expression. They seem to provide a scaffold on which other proteins can bind and mediate processes such as e…
BnaA01g09150D	10.9359	2.44604	0.229935	-2.1207	7.26206e-22	1.15859e-20	down	chrA01:4465910-4466728:+	F-box protein At4g18380	EpsG	EpsG family. This family of proteins are related to the EpsG protein from B. subtilis. These proteins are likely glycosyl transferases belonging to the membrane protein GT-C clan.
BnaA01g00210D	22.0472	4.9441	0.229981	-2.12041	3.89191e-115	4.63704e-113	down	chrA01:74738-78436:+	Phosphoenolpyruvate carboxykinase [ATP]	PEPCK_ATP	Phosphoenolpyruvate carboxykinase.
BnaA01g12200D	18.1426	4.05119	0.230292	-2.11846	1.14913e-30	2.70368e-29	down	chrA01:6095097-6096741:+	ER membrane protein complex subunit 3	DUF106	Integral membrane protein DUF106. This archaebacterial protein family has no known function. Members are predicted to be integral membrane proteins.
BnaA01g06940D	5.10475	1.15008	0.230437	-2.11755	1.92111e-30	4.48909e-29	down	chrA01:3267222-3270627:-	Subtilisin-like protease SBT1.7	DUF1034	Fn3-like domain (DUF1034). This family consists of several domains of unknown function which are present in several bacterial and plant peptidases. This domain is found in conjunction with pfam00082, pfam02225 and is often found with pfam00746. This domain has a structure similar to an Fn3 domain.
BnaA01g04440D	4.55639	1.02835	0.230858	-2.11492	4.37816e-21	6.69565e-20	down	chrA01:2066181-2068483:-	E3 ubiquitin-protein ligase At4g11680	zf-RING_2	Ring finger domain.
BnaA01g09390D	20.6424	4.60928	0.230868	-2.11486	1.59464e-34	4.3169e-33	down	chrA01:4604167-4605102:+	Replication protein A 14 kDa subunit B	Rep_fac-A_3	Replication factor A protein 3. Replication factor A is involved in eukaryotic DNA replication, recombination and repair.
BnaA01g06700D	16.5627	3.7264	0.231411	-2.11147	3.22768e-22	5.24959e-21	down	chrA01:3112352-3115459:+	Diacylglycerol kinase 7	DAGK_acc	Diacylglycerol kinase accessory domain. Diacylglycerol (DAG) is a second messenger that acts as a protein kinase C activator. This domain is assumed to be an accessory domain: its function is unknown.
BnaA01g09620D	11.9609	2.70441	0.23157	-2.11048	1.08812e-27	2.28706e-26	down	chrA01:4701181-4702360:-	Ras-related protein RABA1d	Ras	Ras family. Includes sub-families Ras, Rab, Rac, Ral, Ran, Rap Ypt1 and more. Shares P-loop motif with GTP_EFTU, arf and myosin_head. See pfam00009 pfam00025, pfam00063. As regards Rab GTPases, these are important regulators of vesicle formation, motility and fusion. They share a fold in common with all Ras GTPases: this is a six-stranded beta-sheet surrounded by five alpha-helices.
BnaA01g11420D	67.6621	15.3413	0.232075	-2.10734	1.23303e-236	4.04297e-234	down	chrA01:5678535-5680556:-	BAG family molecular chaperone regulator 7	IQ	IQ calmodulin-binding motif. Calmodulin-binding motif.
BnaA01g11020D	15.8999	3.59586	0.232314	-2.10585	3.56937e-26	7.01314e-25	down	chrA01:5489510-5490756:+	Protein BUD31 homolog 1	G10	G10 protein.
BnaA01g10830D	2.16858	0.492075	0.232422	-2.10518	2.40603e-15	2.6213e-14	down	chrA01:5411918-5415507:-	Small RNA 2'-O-methyltransferase	Methyltransf_12	Methyltransferase domain. Members of this family are SAM dependent methyltransferases.
BnaA01g09800D	7.04491	1.60571	0.232507	-2.10465	5.91329e-19	8.01727e-18	down	chrA01:4820324-4821936:-	Vacuolar protein sorting-associated protein 25	ESCRT-II	ESCRT-II complex subunit. This family of conserved eukaryotic proteins are subunits of the endosome associated complex ESCRT-II which recruits transport machinery for protein sorting at the multivesicular body (MVB). This protein complex transiently associates with the endosomal membrane and thereby initiates the formation of ESCRT-III, a membrane-associated protein complex that functions immedia…
BnaA01g01800D	37.5715	8.50144	0.232536	-2.10448	1.34807e-85	1.10948e-83	down	chrA01:934181-935356:+	.	CRAL_TRIO_2	Divergent CRAL/TRIO domain. This family includes divergent members of the CRAL-TRIO domain family. This family includes ECM25 that contains a divergent CRAL-TRIO domain identified by Gallego and colleagues.
BnaA01g05380D	17.367	3.94634	0.23265	-2.10377	4.69343e-59	2.47255e-57	down	chrA01:2515012-2517460:-	Chaperone protein dnaJ 10	DnaJ-X	X-domain of DnaJ-containing. IN certain plant and yeast proteins, the DnaJ-1 proteins have a three-domain structure. The x-domain lies between the N-terminal DnaJ and the C-terminal Z domains. The exact function is not known.
BnaA01g10050D	5.1822	1.17609	0.233017	-2.10149	9.33957e-42	3.1688e-40	down	chrA01:5008731-5016049:+	Vacuolar protein sorting-associated protein 54, chloroplastic	Vps54	Vps54-like protein. This family contains various proteins that are homologs of the yeast Vps54 protein, such as the rat homolog , the human homolog, and the mouse homolog. In yeast, Vps54 associates with Vps52 and Vps53 proteins to form a trimolecular complex that is involved in protein transport between Golgi, endosomal, and vacuolar compartments. All Vps54 homologs contain a coiled coil region …
BnaA01g04890D	24.2034	5.50492	0.233235	-2.10015	3.39414e-69	2.16349e-67	down	chrA01:2265243-2266516:-	.	PNRC	Proline-rich nuclear receptor coactivator. The PNRC family, proline-rich nuclear receptor coactivator, is found in eukaryotes, and is approximately 60 amino acids in length. There is a conserved YAG sequence motif.
BnaA01g09730D	12.0591	2.74225	0.233346	-2.09946	2.05801e-45	7.74558e-44	down	chrA01:4786310-4789503:+	Cyclic phosphodiesterase	DUF1264	Protein of unknown function (DUF1264). This family contains a number of bacterial and eukaryotic proteins of unknown function that are approximately 200 residues long. Some family members are annotated as putative lipoproteins.
BnaA01g01810D	9.51848	2.17347	0.233347	-2.09945	2.4512e-32	6.12591e-31	down	chrA01:935850-937891:-	IST1-like protein	Ist1	Regulator of Vps4 activity in the MVB pathway. ESCRT-I, -II, and -III are endosomal sorting complexes required for transporting proteins and carry out cargo sorting and vesicle formation in the multivesicular bodies, MVBs, pathway. These complexes are transiently recruited from the cytoplasm to the endosomal membrane where they bind transmembrane proteins previously marked for degradation by mono…
BnaA01g07340D	16.7995	3.83471	0.233642	-2.09763	1.02772e-53	4.80845e-52	down	chrA01:3447491-3449654:-	Protein arginine N-methyltransferase 1.1	PrmA	Ribosomal protein L11 methyltransferase (PrmA). This family consists of several Ribosomal protein L11 methyltransferase (EC:2.1.1.-) sequences.
BnaA01g09990D	6.13768	1.39543	0.233835	-2.09643	2.34711e-20	3.43689e-19	down	chrA01:4961631-4964724:-	.	PAE	Pectinacetylesterase.
BnaA01g12390D	6.70724	1.53308	0.234385	-2.09305	1.1384e-22	1.89592e-21	down	chrA01:6189556-6191907:+	Probable tRNA N6-adenosine threonylcarbamoyltransferase	Peptidase_M22	Glycoprotease family. The Peptidase M22 proteins are part of the HSP70-actin superfamily. The region represented here is an insert into the fold and is not found in the rest of the family (beyond the Peptidase M22 family). Included in this family are the Rhizobial NodU proteins and the HypF regulator. This region also contains the histidine dyad believed to coordinate the metal ion and hence prov…
BnaA01g08520D	2.34814	0.529915	0.234897	-2.0899	4.1116e-09	2.74933e-08	down	chrA01:4076590-4079684:+	Decapping nuclease DXO homolog, chloroplastic	RAI1	RAI1 like PD-(D/E)XK nuclease. RAI1 is homologous to Caenorhabditis elegans DOM-3 and human DOM3Z and binds to a nuclear exoribonuclease. It is required for 5.8S rRNA processing. Profile-profile comparison tools demonstrate this to be a PD-(D/E)XK nuclease, with a full set of canonical active site signature motifs characteristic to the PD-(D/E)XK nuclease superfamily.
BnaA01g10020D	2.51096	0.574101	0.234902	-2.08987	3.3898e-11	2.74194e-10	down	chrA01:4995119-4998968:+	.	Nodulin-like	Nodulin-like. This family represents a conserved region within plant nodulin-like proteins.
BnaA01g04100D	11.0543	2.53554	0.235875	-2.08391	1.02067e-71	6.79107e-70	down	chrA01:1880493-1885326:-	Nuclear poly(A) polymerase 4	PAP_central	Poly(A) polymerase central domain. The central domain of Poly(A) polymerase shares structural similarity with the allosteric activity domain of ribonucleotide reductase R1, which comprises a four-helix bundle and a three-stranded mixed beta- sheet. Even though the two enzymes bind ATP, the ATP-recognition motifs are different.
BnaA01g04130D	2.30376	0.531935	0.236278	-2.08144	1.02816e-30	2.42323e-29	down	chrA01:1898582-1908186:+	Calcineurin-binding protein cabin-1	TPR_12	Tetratricopeptide repeat.
BnaA01g05070D	9.23239	2.11342	0.236561	-2.07971	7.31792e-24	1.28892e-22	down	chrA01:2377090-2378879:-	Probable diphthine methyl ester synthase	TP_methylase	Tetrapyrrole (Corrin/Porphyrin) Methylases. This family uses S-AdoMet in the methylation of diverse substrates. This family includes a related group of bacterial proteins of unknown function. This family includes the methylase Dipthine synthase.
BnaA01g00760D	4.17099	0.962559	0.236615	-2.07938	1.18783e-14	1.23847e-13	down	chrA01:444852-446534:-	.	Remorin_C	Remorin, C-terminal region. Remorins are plant-specific plasma membrane-associated proteins. In tobacco remorin co-purifies with lipid rafts. Most remorins have a variable, proline-rich C-half and a more conserved N-half that is predicted to form coiled coils. Consistent with this, circular dichroism studies have demonstrated that much of the protein is alpha-helical. Remorins exist in plasma mem…
BnaA01g04660D	12.3294	2.84674	0.23684	-2.07802	3.89068e-63	2.25549e-61	down	chrA01:2168474-2171582:-	Protein WVD2-like 1	TPX2	Targeting protein for Xklp2 (TPX2). This family represents a conserved region approximately 60 residues long within the eukaryotic targeting protein for Xklp2 (TPX2). Xklp2 is a kinesin-like protein localized on centrosomes throughout the cell cycle and on spindle pole microtubules during metaphase. In Xenopus, it has been shown that Xklp2 protein is required for centrosome separation and mainten…
BnaA01g02690D	4.90307	1.12994	0.237252	-2.07551	1.77665e-33	4.65289e-32	down	chrA01:1335267-1339080:-	SWI/SNF complex subunit SWI3D	SWIRM	SWIRM domain. This SWIRM domain is a small alpha-helical domain of about 85 amino acid residues found in chromosomal proteins. It contains a helix-turn helix motif and binds to DNA.
BnaA01g09770D	6.26583	1.45117	0.23772	-2.07266	7.96216e-17	9.49482e-16	down	chrA01:4805978-4807656:-	Pentatricopeptide repeat-containing protein At4g18975, chloroplastic	Herpes_ORF11	Herpesvirus dUTPase protein. This family of proteins are found in Herpesvirus proteins. This family includes proteins called ORF10 and ORF11 amongst others. However, these proteins seem to be related to other dUTPases pfam00692 suggesting that these proteins are also dUTPases (Bateman A pers. obs.).
BnaA01g12040D	57.1363	13.2873	0.238092	-2.07041	4.51806e-105	4.72391e-103	down	chrA01:6038697-6039866:-	Iron-sulfur cluster assembly protein 1	NifU_N	NifU-like N terminal domain. This domain is found in NifU in combination with pfam01106. This domain is found on isolated in several bacterial species. The nif genes are responsible for nitrogen fixation. However this domain is found in bacteria that do not fix nitrogen, so it may have a broader significance in the cell than nitrogen fixation. These proteins appear to be scaffold proteins for iro…
BnaA01g01560D	17.7724	4.1428	0.238701	-2.06673	1.1689e-13	1.13824e-12	down	chrA01:839899-841015:+	Cold shock protein 1	CSD	'Cold-shock' DNA-binding domain.
BnaA01g11940D	12.0865	2.82251	0.239072	-2.06448	9.99016e-34	2.63486e-32	down	chrA01:5995411-5997916:-	Nucleosome-remodeling factor subunit NURF301	BAH	BAH domain. This domain has been called BAH (Bromo adjacent homology) domain and has also been called ELM1 and BAM (Bromo adjacent motif) domain. The function of this domain is unknown but may be involved in protein-protein interaction.
BnaA01g09940D	4.25611	0.995457	0.239254	-2.06338	6.92045e-11	5.45674e-10	down	chrA01:4897672-4899199:+	.	DUF2797	Protein of unknown function (DUF2797). This family of proteins has no known function.
BnaA01g02780D	1.39054	0.325374	0.239269	-2.0633	1.24083e-06	6.25927e-06	down	chrA01:1369239-1372578:+	4-hydroxy-3-methylbut-2-enyl diphosphate reductase, chloroplastic	LYTB	LytB protein. The mevalonate-independent 2-C-methyl-D-erythritol 4-phosphate (MEP) pathway for isoprenoid biosynthesis is essential in many eubacteria, plants, and the malaria parasite. The LytB gene is involved in the trunk line of the MEP pathway.
BnaA01g02990D	2.25002	0.525223	0.239861	-2.05973	2.55409e-08	1.57062e-07	down	chrA01:1454913-1457560:-	.	G-patch	G-patch domain. This domain is found in a number of RNA binding proteins, and is also found in proteins that contain RNA binding domains. This suggests that this domain may have an RNA binding function. This domain has seven highly conserved glycines.
BnaA01g01420D	8.90149	2.08737	0.240629	-2.05512	8.97232e-34	2.37558e-32	down	chrA01:754634-757215:-	Probable serine protease EDA2	Peptidase_S28	Serine carboxypeptidase S28. These serine proteases include several eukaryotic enzymes such as lysosomal Pro-X carboxypeptidase, dipeptidyl-peptidase II, and thymus-specific serine peptidase.
BnaA01g05960D	3.715	0.878346	0.240759	-2.05434	5.66046e-10	4.11201e-09	down	chrA01:2760843-2763181:-	Putative glutathione-specific gamma-glutamylcyclotransferase 2	ChaC	ChaC-like protein. The ChaC protein is thought to be associated with the putative ChaA Ca2+/H+ cation transport protein in Escherichia coli. Its function is not known. This family also includes homologues regions from several other bacterial and eukaryotic proteins.
BnaA01g04790D	13.2581	3.1419	0.241442	-2.05025	1.92975e-20	2.842e-19	down	chrA01:2233543-2235445:+	ER membrane protein complex subunit 7 homolog	DUF2012	Protein of unknown function (DUF2012). This is a eukaryotic family of uncharacterized proteins.
BnaA01g01620D	2.6617	0.635155	0.242428	-2.04437	1.34656e-07	7.66208e-07	down	chrA01:852682-854173:-	.	Protoglobin	Protoglobin. This family includes protoglobin from Methanosarcina acetivorans C2A. It is also found near the N-terminus of the Haem-based aerotactic transducer HemAT in Bacillus subtilis. It is part of the haemoglobin superfamily. Protoglobin has specific loops and an amino-terminal extension which leads to the burying of the haem within the matrix of the protein. Protoglobin-specific apolar tunn…
BnaA01g09260D	4.55166	1.07628	0.242682	-2.04286	1.39782e-22	2.31853e-21	down	chrA01:4516968-4521644:+	Probable ATP-dependent RNA helicase DHX35	OB_NTP_bind	Oligonucleotide/oligosaccharide-binding (OB)-fold. This family is found towards the C-terminus of the DEAD-box helicases (pfam00270). In these helicases it is apparently always found in association with pfam04408. There do seem to be a couple of instances where it occurs by itself. The structure PDB:3i4u adopts an OB-fold. helicases (pfam00270). In these helicases it is apparently always found in…
BnaA01g02070D	2.09192	0.496948	0.242843	-2.04191	3.75586e-06	1.7694e-05	down	chrA01:1030058-1032660:-	CMP-sialic acid transporter 4	Nuc_sug_transp	Nucleotide-sugar transporter. This family of membrane proteins transport nucleotide sugars from the cytoplasm into golgi vesicles. Human SLC35A1 transports CMP-sialic acid, SLC35A2 transports UDP-galactose and SLC35A3 transports UDP-GlcNAc.
BnaA01g11800D	441.113	104.374	0.242852	-2.04185	0	0	down	chrA01:5895775-5897782:-	Peroxidase 42	peroxidase	Peroxidase.
BnaA01g04750D	2.7015	0.643159	0.243567	-2.03761	3.39132e-16	3.89783e-15	down	chrA01:2214311-2217217:-	.	Cast	RIM-binding protein of the cytomatrix active zone. This is a family of proteins that form part of the CAZ (cytomatrix at the active zone) complex which is involved in determining the site of synaptic vesicle fusion. The C-terminus is a PDZ-binding motif that binds directly to RIM (a small G protein Rab-3A effector). The family also contains four coiled-coil domains.
BnaA01g00200D	7.04877	1.67335	0.243806	-2.03619	1.19854e-23	2.08149e-22	down	chrA01:69698-71327:-	Protein RMD5 homolog A	CLTH	CTLH/CRA C-terminal to LisH motif domain. RanBPM is a scaffolding protein and is important in regulating cellular function in both the immune system and the nervous system. This domain is at the C-terminus of the proteins and is the binding domain for the CRA motif (for CT11-RanBPM), which is comprised of approximately 100 amino acids at the C terminal of RanBPM. It was found to be important for …
BnaA01g08560D	1.47288	0.345379	0.243822	-2.0361	1.04568e-06	5.32733e-06	down	chrA01:4101047-4103188:+	.	NYN	NYN domain. These domains are found in the eukaryotic proteins typified by the Nedd4-binding protein 1 and the bacterial YacP-like proteins (Nedd4-BP1, YacP nucleases; NYN domains). The NYN domain shares a common protein fold with two other previously characterized groups of nucleases, namely the PIN (PilT N-terminal) and FLAP/5' --> 3' exonuclease superfamilies. These proteins share a common set…
BnaA01g12010D	18.2148	4.31546	0.243895	-2.03567	6.88662e-47	2.70878e-45	down	chrA01:6016187-6017354:-	.	PhnI	Bacterial phosphonate metabolizm protein (PhnI). This family consists of several Proteobacterial phosphonate metabolizm protein (PhnI) sequences. Bacteria that use phosphonates as a phosphorus source must be able to break the stable carbon-phosphorus bond. In Escherichia coli phosphonates are broken down by a C-P lyase that has a broad substrate specificity. The genes for phosphonate uptake and d…
BnaA01g09480D	1.20139	0.285843	0.243906	-2.03561	7.42329e-08	4.34396e-07	down	chrA01:4643316-4646737:+	Protein MALE DISCOVERER 2	Pkinase	Protein kinase domain.
BnaA01g12140D	9.96605	2.36604	0.244031	-2.03486	8.54177e-34	2.26744e-32	down	chrA01:6080826-6082507:+	Alkaline ceramidase 3	Ceramidase	Ceramidase. This family consists of several ceramidases. Ceramidases are enzymes involved in regulating cellular levels of ceramides, sphingoid bases, and their phosphates, EC:3.5.1.23.
BnaA01g02860D	2.06983	0.490452	0.244139	-2.03422	6.76945e-13	6.27437e-12	down	chrA01:1398977-1403299:-	Alpha-L-fucosidase 2	Glyco_hyd_65N_2	Glycosyl hydrolase family 65, N-terminal domain. This domain represents a domain found to the N-terminus of the glycosyl hydrolase 65 family catalytic domain.
BnaA01g06390D	5.33061	1.27526	0.24493	-2.02956	3.67485e-08	2.22445e-07	down	chrA01:2945201-2945813:+	Eukaryotic translation initiation factor isoform 4G-2	MA3	MA3 domain. Domain in DAP-5, eIF4G, MA-3 and other proteins. Highly alpha-helical. May contain repeats and/or regions similar to MIF4G domains.
BnaA01g04510D	20.4782	4.8925	0.245047	-2.02887	1.35649e-39	4.31991e-38	down	chrA01:2105832-2107371:+	V-type proton ATPase subunit c''1	ATP-synt_C	ATP synthase subunit C.
BnaA01g05040D	5.0534	1.20794	0.245052	-2.02884	2.409e-26	4.77444e-25	down	chrA01:2365026-2368895:+	BTB/POZ domain-containing protein NPY1	NPH3	NPH3 family. Phototropism of Arabidopsis thaliana seedlings in response to a blue light source is initiated by nonphototropic hypocotyl 1 (NPH1), a light-activated serine-threonine protein kinase. Mutations in NPH3 disrupt early signaling occurring downstream of the NPH1 photoreceptor. The NPH3 gene encodes a NPH1-interacting protein. NPH3 is a member of a large protein family, apparently specifi…
BnaA01g10160D	14.5279	3.46589	0.245321	-2.02726	4.42162e-30	1.01754e-28	down	chrA01:5050809-5052495:-	Ras-related protein RABF2b	Ras	Ras family. Includes sub-families Ras, Rab, Rac, Ral, Ran, Rap Ypt1 and more. Shares P-loop motif with GTP_EFTU, arf and myosin_head. See pfam00009 pfam00025, pfam00063. As regards Rab GTPases, these are important regulators of vesicle formation, motility and fusion. They share a fold in common with all Ras GTPases: this is a six-stranded beta-sheet surrounded by five alpha-helices.
BnaA01g06520D	4.29347	1.03327	0.246598	-2.01977	1.13775e-09	8.04552e-09	down	chrA01:3017920-3019265:-	.	Atg14	UV radiation resistance protein and autophagy-related subunit 14. The Atg14 or Apg14 proteins are hydrophilic proteins with a predicted molecular mass of 40.5 kDa, and have a coiled-coil motif at the N terminus region. Yeast cells with mutant Atg14 are defective not only in autophagy but also in sorting of carboxypeptidase Y (CPY), a vacuolar-soluble hydrolase, to the vacuole. Subcellular fractio…
BnaA01g04620D	32.3188	7.75706	0.246733	-2.01898	1.73885e-100	1.70499e-98	down	chrA01:2156044-2157550:-	Probable sugar phosphate/phosphate translocator At4g32390	TPT	Triose-phosphate Transporter family. This family includes transporters with a specificity for triose phosphate.
BnaA01g02290D	4.18983	1.01667	0.247167	-2.01644	8.90625e-20	1.26747e-18	down	chrA01:1171099-1174336:-	DEAD-box ATP-dependent RNA helicase 16	DEAD	DEAD/DEAH box helicase. Members of this family include the DEAD and DEAH box helicases. Helicases are involved in unwinding nucleic acids. The DEAD box helicases are involved in various aspects of RNA metabolizm, including nuclear transcription, pre mRNA splicing, ribosome biogenesis, nucleocytoplasmic transport, translation, RNA decay and organellar gene expression.
BnaA01g11930D	6.12065	1.48234	0.247348	-2.01539	2.98004e-33	7.69628e-32	down	chrA01:5991223-5995308:+	Protein STRUBBELIG-RECEPTOR FAMILY 8	Pkinase	Protein kinase domain.
BnaA01g06810D	3.12607	0.760115	0.247526	-2.01435	4.8967e-15	5.23737e-14	down	chrA01:3165531-3169058:+	VIN3-like protein 2	DUF1423	Protein of unknown function (DUF1423). This family represents a conserved region approximately 500 residues long within a number of Arabidopsis thaliana proteins of unknown function.
BnaA01g07900D	7.03904	1.67834	0.247685	-2.01342	3.82319e-09	2.56545e-08	down	chrA01:3733367-3734067:-	.	EpsG	EpsG family. This family of proteins are related to the EpsG protein from B. subtilis. These proteins are likely glycosyl transferases belonging to the membrane protein GT-C clan.
BnaA01g03880D	5.16	1.26601	0.248333	-2.00965	4.07945e-12	3.56124e-11	down	chrA01:1792689-1794598:-	Calcineurin B-like protein 10	EF-hand_7	EF-hand domain pair.
BnaA01g01070D	2.05067	0.498065	0.249338	-2.00383	3.24181e-10	2.4101e-09	down	chrA01:574889-578111:-	Probable Xaa-Pro aminopeptidase P	Peptidase_M24	Metallopeptidase family M24. This family contains metallopeptidases. It also contains non-peptidase homologues such as the N terminal domain of Spt16 which is a histone H3-H4 binding module.
BnaA01g03630D	3.07818	0.748216	0.249507	-2.00285	5.57124e-23	9.37753e-22	down	chrA01:1698533-1703796:+	F-box/LRR-repeat protein 15	F-box-like	F-box-like. This is an F-box-like family.
BnaA01g05620D	3.8486	0.939876	0.250252	-1.99855	9.3956e-14	9.22367e-13	down	chrA01:2625123-2627336:+	Pentatricopeptide repeat-containing protein At4g39620, chloroplastic	PPR_2	PPR repeat family. This repeat has no known function. It is about 35 amino acids long and is found in up to 18 copies in some proteins. The family appears to be greatly expanded in plants and fungi. The repeat has been called PPR.
BnaA01g06040D	5.57675	1.36226	0.251092	-1.99371	6.95493e-12	5.96224e-11	down	chrA01:2797774-2798989:+	.	DUF1218	Protein of unknown function (DUF1218). This family contains hypothetical plant proteins of unknown function. Family members contain a number of conserved cysteine residues.
BnaA01g03400D	12.2708	3.00247	0.251433	-1.99175	2.6029e-43	9.24458e-42	down	chrA01:1610993-1613841:-	Phospho-2-dehydro-3-deoxyheptonate aldolase 2, chloroplastic	DAHP_synth_2	Class-II DAHP synthetase family. Members of this family are aldolase enzymes that catalyse the first step of the shikimate pathway.
BnaA01g12130D	3.48476	0.849497	0.25181	-1.98959	2.25564e-16	2.61526e-15	down	chrA01:6071143-6074143:-	.	SBDS_C	SBDS protein C-terminal domain. This family is highly conserved in species ranging from archaea to vertebrates and plants. The family contains several Shwachman-Bodian-Diamond syndrome (SBDS) proteins from both mouse and humans. Shwachman-Diamond syndrome is an autosomal recessive disorder with clinical features that include pancreatic exocrine insufficiency, haematological dysfunction and skelet…
BnaA01g07350D	13.7224	3.37547	0.252224	-1.98722	3.67855e-49	1.53846e-47	down	chrA01:3449883-3453437:-	Xaa-Pro dipeptidase	Peptidase_M24	Metallopeptidase family M24. This family contains metallopeptidases. It also contains non-peptidase homologues such as the N terminal domain of Spt16 which is a histone H3-H4 binding module.
BnaA01g08630D	13.3586	3.30264	0.252888	-1.98343	1.61219e-37	4.84438e-36	down	chrA01:4142215-4143988:+	Syntaxin-23	Syntaxin_2	Syntaxin-like protein. This domain includes syntaxin-like domains including from the Vam3p protein.
BnaA01g07280D	6.15907	1.52137	0.253257	-1.98133	3.75798e-15	4.04158e-14	down	chrA01:3430323-3431903:+	Thioredoxin-like 2-2, chloroplastic	Thioredoxin	Thioredoxin. Thioredoxins are small enzymes that participate in redox reactions, via the reversible oxidation of an active centre disulfide bond. Some members with only the active site are not separated from the noise.
BnaA01g02590D	3.23307	0.804716	0.253645	-1.97912	3.3429e-15	3.60463e-14	down	chrA01:1295439-1298537:+	Bifunctional dihydrofolate reductase-thymidylate synthase 2	Thymidylat_synt	Thymidylate synthase.
BnaA01g00580D	0.914673	0.228254	0.253953	-1.97737	8.72267e-05	0.000331179	down	chrA01:315446-317614:-	Indole-3-acetic acid-amido synthetase GH3.3	GH3	GH3 auxin-responsive promoter.
BnaA01g06850D	3.54449	0.875439	0.254196	-1.97599	4.26948e-33	1.0978e-31	down	chrA01:3210331-3216495:-	Villin-4	VHP	Villin headpiece domain.
BnaA01g00690D	4.00634	1.00382	0.254655	-1.97338	7.08098e-12	6.06776e-11	down	chrA01:379803-381866:-	Cysteine proteinase COT44 (Fragment)	Peptidase_C1	Papain family cysteine protease.
BnaA01g08210D	4.48523	1.10985	0.255074	-1.97101	4.57763e-06	2.12913e-05	down	chrA01:3915222-3915864:-	.	Cupin_3	Protein of unknown function (DUF861). This family consists of several proteins which seem to be specific to plants and bacteria. The function of this family is unknown.
BnaA01g02020D	7.81059	1.95237	0.255996	-1.96581	1.88074e-16	2.19113e-15	down	chrA01:1008094-1009487:-	AP-1 complex subunit sigma-2	Clat_adaptor_s	Clathrin adaptor complex small chain.
BnaA01g12160D	5.1421	1.28276	0.25669	-1.9619	1.09275e-19	1.54814e-18	down	chrA01:6086703-6089922:-	U4/U6.U5 tri-snRNP-associated protein 2	UCH	Ubiquitin carboxyl-terminal hydrolase.
BnaA01g09220D	5.99383	1.50885	0.256945	-1.96047	5.0621e-22	8.13948e-21	down	chrA01:4496956-4499312:-	Adenylosuccinate lyase	ASL_C	Adenylosuccinate lyase C-terminal. This domain is found at the C-terminus of adenylosuccinate lyase(ASL; PurB in Escherichia coli). It has been identified in bacteria, eukaryotes and archaea and is found together with the lyase domain pfam00206. ASL catalyses the cleavage of succinylaminoimidazole carboxamide ribotide to aminoimidazole carboxamide ribotide and fumarate and the cleavage of adenylo…
BnaA01g04480D	6.56801	1.65027	0.257345	-1.95823	3.24702e-50	1.40234e-48	down	chrA01:2077282-2086311:-	Transcriptional corepressor LEUNIG	WD40	WD domain, G-beta repeat.
BnaA01g05540D	9.35919	2.35008	0.257484	-1.95744	3.39707e-23	5.77009e-22	down	chrA01:2596918-2599725:+	Shikimate kinase 2, chloroplastic	SKI	Shikimate kinase.
BnaA01g00730D	1.40383	0.34967	0.257975	-1.9547	7.26196e-05	0.000279342	down	chrA01:430859-432758:+	Transcription factor SPATULA	HLH	Helix-loop-helix DNA-binding domain.
BnaA01g07120D	2.14015	0.539714	0.258896	-1.94955	9.0531e-08	5.25121e-07	down	chrA01:3353610-3356349:+	Guanine nucleotide-binding protein subunit beta-like protein 1	WD40	WD domain, G-beta repeat.
BnaA01g08760D	2.54094	0.647353	0.259288	-1.94737	8.76526e-09	5.6754e-08	down	chrA01:4232879-4236645:+	Probable ADP-ribosylation factor GTPase-activating protein AGD8	ArfGap	Putative GTPase activating protein for Arf. Putative zinc fingers with GTPase activating proteins (GAPs) towards the small GTPase, Arf. The GAP of ARD1 stimulates GTPase hydrolysis for ARD1 but not ARFs.
BnaA01g02660D	8.95264	2.26838	0.259458	-1.94642	2.30645e-31	5.57713e-30	down	chrA01:1323940-1326508:+	Guanine nucleotide-binding protein subunit beta	WD40	WD domain, G-beta repeat.
BnaA01g05300D	7.35902	1.85869	0.25958	-1.94575	1.89878e-44	6.94851e-43	down	chrA01:2494980-2499881:+	V-type proton ATPase subunit a3	V_ATPase_I	V-type ATPase 116kDa subunit family. This family consists of the 116kDa V-type ATPase (vacuolar (H+)-ATPases) subunits, as well as V-type ATP synthase subunit i. The V-type ATPases family are proton pumps that acidify intracellular compartments in eukaryotic cells for example yeast central vacuoles, clathrin-coated and synaptic vesicles. They have important roles in membrane trafficking processes…
BnaA01g07170D	13.2589	3.33767	0.259951	-1.94369	5.69271e-37	1.67496e-35	down	chrA01:3368978-3371235:+	Mitogen-activated protein kinase kinase 2	Pkinase	Protein kinase domain.
BnaA01g09700D	6.30812	1.601	0.260052	-1.94313	4.41527e-17	5.37145e-16	down	chrA01:4771792-4774732:+	BES1/BZR1 homolog protein 3	DUF822	Plant protein of unknown function (DUF822). This family consists of the N terminal regions of several plant proteins of unknown function.
BnaA01g11870D	33.3839	8.47581	0.260366	-1.94139	1.56208e-133	2.21535e-131	down	chrA01:5932989-5938953:+	L-ascorbate oxidase homolog	Cu-oxidase	Multicopper oxidase. Many of the proteins in this family contain multiple similar copies of this plastocyanin-like domain.
BnaA01g05220D	9.42655	2.39945	0.261322	-1.9361	5.37121e-42	1.83913e-40	down	chrA01:2440911-2443961:-	tRNA-dihydrouridine(47) synthase [NAD(P)(+)]-like	Dus	Dihydrouridine synthase (Dus). Members of this family catalyse the reduction of the 5,6-double bond of a uridine residue on tRNA. Dihydrouridine modification of tRNA is widely observed in prokaryotes and eukaryotes, and also in some archae. Most dihydrouridines are found in the D loop of t-RNAs. The role of dihydrouridine in tRNA is currently unknown, but may increase conformational flexibility o…
BnaA01g02350D	3.4873	0.892204	0.261622	-1.93445	2.85487e-13	2.70543e-12	down	chrA01:1196586-1199005:+	Alkaline/neutral invertase CINV2	Glyco_hydro_100	Alkaline and neutral invertase. This is a family of bacterial and plant alkaline and neutral invertases, EC:3.2.1.26, previously known as Invertase_neut pfam04853.
BnaA01g06420D	9.38413	2.3914	0.261642	-1.93433	1.44388e-36	4.17635e-35	down	chrA01:2972293-2974442:-	.	zf-CCHC_4	Zinc knuckle. The zinc knuckle is a zinc binding motif composed of the the following CX2CX4HX4C where X can be any amino acid. This particular family is found in plant proteins.
BnaA01g10630D	18.8675	4.85568	0.262619	-1.92895	1.32121e-62	7.58417e-61	down	chrA01:5304343-5306129:-	Small nuclear ribonucleoprotein-associated protein B'	LSM	LSM domain. The LSM domain contains Sm proteins as well as other related LSM (Like Sm) proteins. The U1, U2, U4/U6, and U5 small nuclear ribonucleoprotein particles (snRNPs) involved in pre-mRNA splicing contain seven Sm proteins (B/B', D1, D2, D3, E, F and G) in common, which assemble around the Sm site present in four of the major spliceosomal small nuclear RNAs. The U6 snRNP binds to the LSM (…
BnaA01g00980D	5.06824	1.2972	0.262722	-1.92839	3.8203e-26	7.48107e-25	down	chrA01:535291-540515:-	BEL1-like homeodomain protein 2	POX	Associated with HOX. The function of this domain is unknown. It is often found in plant proteins associated with pfam00046.
BnaA01g01760D	6.45949	1.64495	0.263644	-1.92334	1.58544e-13	1.53076e-12	down	chrA01:924395-926661:+	Serine/arginine-rich splicing factor SR45a	RRM_1	RNA recognition motif. (a.k.a. RRM, RBD, or RNP domain). The RRM motif is probably diagnostic of an RNA binding protein. RRMs are found in a variety of RNA binding proteins, including various hnRNP proteins, proteins implicated in regulation of alternative splicing, and protein components of snRNPs. The motif also appears in a few single stranded DNA binding proteins. The RRM structure consists o…
BnaA01g08820D	6.47304	1.6683	0.264025	-1.92125	5.39891e-12	4.6713e-11	down	chrA01:4260542-4261999:+	.	TUSC2	tumor suppressor candidate 2. This family of proteins are candidate tumor suppressors.
BnaA01g11520D	2.49721	0.645488	0.26411	-1.92079	2.31882e-15	2.52878e-14	down	chrA01:5737199-5740091:+	.	DUF2921	Protein of unknown function (DUF2921). This eukaryotic family of proteins has no known function.
BnaA01g06540D	26.6364	6.89049	0.264873	-1.91663	1.32946e-54	6.33597e-53	down	chrA01:3029631-3031140:-	Putative glutamine amidotransferase-like protein C13C5.04	GATase	Glutamine amidotransferase class-I.
BnaA01g01980D	14.9123	3.85142	0.265398	-1.91377	8.17996e-51	3.57424e-49	down	chrA01:997393-999715:-	Ankyrin repeat domain-containing protein 2A	Ank_2	Ankyrin repeats (3 copies).
BnaA01g10510D	3.45009	0.896142	0.265845	-1.91135	1.9192e-12	1.71935e-11	down	chrA01:5237183-5239512:+	Membrane-bound transcription factor site-2 protease	Peptidase_M50	Peptidase family M50.
BnaA01g04520D	3.57473	0.934114	0.26717	-1.90417	2.56853e-28	5.53782e-27	down	chrA01:2107641-2114667:+	Probable boron transporter 7	SHMT	Serine hydroxymethyltransferase.
BnaA01g09380D	1.18676	0.304256	0.267186	-1.90409	0.0121862	0.028909	down	chrA01:4602619-4603945:-	.	DUF2014	Domain of unknown function (DUF2014). This domain is found at the C terminal of a family of ER membrane bound transcription factors called sterol regulatory element binding proteins (SREBP).
BnaA01g10060D	3.68826	0.960344	0.267344	-1.90323	3.24702e-10	2.41353e-09	down	chrA01:5016302-5018223:+	Iron-sulfur protein NUBPL	ParA	ParA/MinD ATPase like. This family contains ATPases involved in plasmid partitioning. It also contains the cytosolic Fe-S cluster assembling factor NBP35 which is required for biogenesis and export of both ribosomal subunits.
BnaA01g10530D	16.5893	4.32831	0.267787	-1.90084	9.1805e-71	6.03968e-69	down	chrA01:5269984-5274643:+	CTP synthase 2	CTP_synth_N	CTP synthase N-terminus. This family consists of the N-terminal region of the CTP synthase protein (EC:6.3.4.2). This family is found in conjunction with pfam00117 located in the C-terminal region of the protein. CTP synthase catalyses the synthesis of CTP from UTP by amination of the pyrimidine ring at the 4-position.
BnaA01g08710D	7.20398	1.86908	0.268003	-1.89968	6.63934e-18	8.50641e-17	down	chrA01:4194505-4196204:-	.	Drf_FH1	Formin Homology Region 1. This region is found in some of the Diaphanous related formins (Drfs). It consists of low complexity repeats of around 12 residues.
BnaA01g06030D	1.71931	0.447423	0.268101	-1.89915	5.66338e-09	3.73723e-08	down	chrA01:2790176-2793261:-	Glucan endo-1,3-beta-glucosidase 5	Glyco_hydro_17	Glycosyl hydrolases family 17.
BnaA01g10590D	4.00557	1.05017	0.268191	-1.89867	1.09476e-28	2.39433e-27	down	chrA01:5290593-5295855:+	Probable lysine-specific demethylase JMJ14	JmjC	JmjC domain, hydroxylase. The JmjC domain belongs to the Cupin superfamily. JmjC-domain proteins may be protein hydroxylases that catalyse a novel histone modification. This is confirmed to be a hydroxylase: the human JmjC protein named Tyw5p unexpectedly acts in the biosynthesis of a hypermodified nucleoside, hydroxy-wybutosine, in tRNA-Phe by catalyzing hydroxylation.
BnaA01g08430D	2.15255	0.568063	0.270021	-1.88886	4.6769e-06	2.17153e-05	down	chrA01:4025276-4027073:-	DnaJ homolog subfamily B member 13	DnaJ	DnaJ domain. DnaJ domains (J-domains) are associated with hsp70 heat-shock system and it is thought that this domain mediates the interaction. DnaJ-domain is therefore part of a chaperone (protein folding) system. The T-antigens, although not in Prosite are confirmed as DnaJ containing domains from literature.
BnaA01g03010D	3.19897	0.840627	0.270583	-1.88586	3.15964e-12	2.78019e-11	down	chrA01:1458555-1460367:+	UDP-glycosyltransferase 73B1	UDPGT	UDP-glucoronosyl and UDP-glucosyl transferase.
BnaA01g08500D	2.43058	0.640439	0.27092	-1.88406	1.84506e-27	3.82894e-26	down	chrA01:4056386-4065259:-	Probable methyltransferase TARBP1	SpoU_methylase	SpoU rRNA Methylase family. This family of proteins probably use S-AdoMet.
BnaA01g04420D	6.7169	1.79583	0.27174	-1.8797	5.85664e-17	7.06677e-16	down	chrA01:2062163-2064137:+	.	DUF4451	Domain of unknown function (DUF4451). This is family of fungal proteins up-regulated during meiosis.
BnaA01g01460D	1.71859	0.453729	0.271871	-1.879	2.43791e-16	2.81624e-15	down	chrA01:782309-787262:+	Probable WRKY transcription factor 16	NB-ARC	NB-ARC domain.
BnaA01g11740D	2.60078	0.689229	0.272181	-1.87736	5.66579e-10	4.11515e-09	down	chrA01:5856692-5859447:-	Proteinaceous RNase P 3	RNase_Zc3h12a	Zc3h12a-like Ribonuclease NYN domain. This domain is found in the Zc3h12a protein which has shown to be a ribonuclease that controls the stability of a set of inflammatory genes. It has been suggested that this domain belongs to the PIN domain superfamily. This domain has also been identified as part of the NYN domain family.
BnaA01g03840D	6.10488	1.61811	0.272516	-1.87559	5.99005e-21	9.07608e-20	down	chrA01:1778840-1781458:-	UDP-sulfoquinovose synthase, chloroplastic	Epimerase	NAD dependent epimerase/dehydratase family. This family of proteins utilize NAD as a cofactor. The proteins in this family use nucleotide-sugar substrates for a variety of chemical reactions.
BnaA01g12080D	8.6816	2.32106	0.272615	-1.87506	1.87438e-23	3.22652e-22	down	chrA01:6048834-6050966:-	Ubiquinol oxidase 4, chloroplastic/chromoplastic	AOX	Alternative oxidase. The alternative oxidase is used as a second terminal oxidase in the mitochondria, electrons are transfered directly from reduced ubiquinol to oxygen forming water. This is not coupled to ATP synthesis and is not inhibited by cyanide, this pathway is a single step process. In rice the transcript levels of the alternative oxidase are increased by low temperature.
BnaA01g08140D	4.18537	1.1111	0.272984	-1.87311	1.82304e-24	3.2974e-23	down	chrA01:3852505-3856474:-	.	DUF4378	Domain of unknown function (DUF4378).
BnaA01g06660D	3.20884	0.848537	0.273126	-1.87236	4.4261e-06	2.06286e-05	down	chrA01:3093969-3094732:+	RING-H2 finger protein ATL14	zf-RING_2	Ring finger domain.
BnaA01g00970D	3.31784	0.884296	0.27367	-1.86949	2.87369e-11	2.33461e-10	down	chrA01:532506-535215:+	Cytoplasmic tRNA 2-thiolation protein 2	DUF2392	Protein of unknown function (DUF2392). This is a family of proteins conserved from plants to humans. The function is not known. It carries a characteristic GRG sequence motif.
BnaA01g00030D	2.97855	0.795053	0.27395	-1.86801	4.37889e-14	4.40317e-13	down	chrA01:2665-5455:-	Protein SCAI	DUF3550	Protein of unknown function (DUF3550/UPF0682). This family of proteins is functionally uncharacterized. This protein is found in eukaryotes. Proteins in this family are typically between 249 to 606 amino acids in length.
BnaA01g06760D	6.54455	1.75909	0.274036	-1.86756	6.77956e-15	7.17817e-14	down	chrA01:3134156-3135651:+	Protein YIPF6	Yip1	Yip1 domain. The Yip1 integral membrane domain contains four transmembrane alpha helices. The domain is characterized by the motifs DLYGP and GY. The Yip1 protein is a golgi protein involved in vesicular transport that interacts with GTPases.
BnaA01g04910D	24.3302	6.52456	0.274467	-1.8653	5.17548e-81	4.00231e-79	down	chrA01:2276046-2278899:+	Aspartate aminotransferase, chloroplastic	Aminotran_1_2	Aminotransferase class I and II.
BnaA01g12100D	7.81577	2.0964	0.274745	-1.86384	5.51928e-25	1.02591e-23	down	chrA01:6055284-6057329:-	Uncharacterized membrane protein At1g16860	GpcrRhopsn4	Rhodopsin-like GPCR transmembrane domain. This region of 270 amino acids is the seven transmembrane alpha-helical domains included within five GPCRRHODOPSN4 motifs of a G-protein-coupled-receptor (GPCR) protein, conserved from nematodes to humans. GPCRs are integral membrane receptors whose intracellular actions are mediated by signalling pathways involving G proteins and downstream secondary mes…
BnaA01g03780D	2.14909	0.578868	0.274836	-1.86336	2.86977e-05	0.000118235	down	chrA01:1754182-1755303:-	Uncharacterized protein At4g33100	UPF0203	Uncharacterized protein family (UPF0203). This family of proteins is functionally uncharacterized.
BnaA01g06860D	1.36771	0.366438	0.27485	-1.86329	1.49313e-16	1.74999e-15	down	chrA01:3225654-3232338:-	.	Urb2	Urb2/Npa2 family. This family includes the Urb2 protein from yeast that are involved in ribosome biogenesis.
BnaA01g00320D	3.05012	0.818719	0.274958	-1.86272	1.10324e-11	9.304e-11	down	chrA01:172747-174959:-	Heptahelical transmembrane protein 4	HlyIII	Haemolysin-III related. Members of this family are integral membrane proteins. This family includes a protein with hemolytic activity from Bacillus cereus. It has been proposed that YOL002c encodes a Saccharomyces cerevisiae protein that plays a key role in metabolic pathways that regulate lipid and phosphate metabolizm. In eukaryotes, members are seven-transmembrane pass molecules found to encod…
BnaA01g03560D	4.21041	1.13737	0.27541	-1.86035	9.70696e-09	6.2496e-08	down	chrA01:1667080-1669179:+	Protein TIC 22, chloroplastic	Tic22	Tic22-like family. The preprotein translocation at the inner envelope membrane of chloroplasts so far involves five proteins: Tic110, Tic55, Tic40, Tic22 (this family) and Tic20. The molecular function of these proteins has not yet been established.
BnaA01g11830D	6.42778	1.73796	0.276414	-1.8551	1.79224e-09	1.24503e-08	down	chrA01:5911222-5912383:+	Autophagy-related protein 8a	Atg8	Autophagy protein Atg8 ubiquitin like. Light chain 3 is proposed to function primarily as a subunit of microtubule associated proteins 1A and 1B and that its expression may regulate microtubule binding activity. Autophagy is generally known as a process involved in the degradation of bulk cytoplasmic components that are non-specifically sequestered into an autophagosome, where they are sequestere…
BnaA01g04600D	12.7041	3.42291	0.27649	-1.8547	5.37095e-91	4.7648e-89	down	chrA01:2147740-2153117:+	Cellulose synthase A catalytic subunit 1 [UDP-forming]	Cellulose_synt	Cellulose synthase. Cellulose, an aggregate of unbranched polymers of beta-1,4-linked glucose residues, is the major component of wood and thus paper, and is synthesized by plants, most algae, some bacteria and fungi, and even some animals. The genes that synthesize cellulose in higher plants differ greatly from the well-characterized genes found in Acetobacter and Agrobacterium sp. More correctl…
BnaA01g09530D	10.5202	2.83431	0.277774	-1.84802	1.02595e-28	2.24623e-27	down	chrA01:4679184-4681995:+	Shaggy-related protein kinase eta	Pkinase	Protein kinase domain.
BnaA01g11400D	27.5284	7.49643	0.278027	-1.8467	1.13262e-68	7.16384e-67	down	chrA01:5670903-5672734:-	Transmembrane protein 184 homolog DDB_G0279555	Solute_trans_a	Organic solute transporter Ostalpha. This family is a transmembrane organic solute transport protein. In vertebrates these proteins form a complex with Ostbeta, and function as bile transporters. In plants they may transport brassinosteroid-like compounds and act as regulators of cell death.
BnaA01g02170D	7.20891	1.94956	0.278098	-1.84633	1.33684e-20	1.98809e-19	down	chrA01:1069636-1072378:-	Glycerol-3-phosphate acyltransferase 3	Acyltransferase	Acyltransferase. This family contains acyltransferases involved in phospholipid biosynthesis and other proteins of unknown function. This family also includes tafazzin, the Barth syndrome gene.
BnaA01g09650D	4.67383	1.27026	0.278768	-1.84286	2.56702e-31	6.19621e-30	down	chrA01:4742419-4746865:+	Protein STICHEL-like 3	DNA_pol3_delta2	DNA polymerase III, delta subunit. DNA polymerase III, delta subunit (EC 2.7.7.7) is required for, along with delta' subunit, the assembly of the processivity factor beta(2) onto primed DNA in the DNA polymerase III holoenzyme-catalysed reaction. The delta subunit is also known as HolA.
BnaA01g08020D	2.7837	0.758043	0.278992	-1.84171	6.73758e-09	4.40847e-08	down	chrA01:3793923-3796515:-	Casein kinase 1-like protein 1	Pkinase	Protein kinase domain.
BnaA01g03510D	4.5373	1.24111	0.279465	-1.83926	1.07969e-21	1.70463e-20	down	chrA01:1647554-1651306:+	BRASSINOSTEROID INSENSITIVE 1-associated receptor kinase 1	Pkinase	Protein kinase domain.
BnaA01g01950D	3.18272	0.86658	0.279874	-1.83715	4.69207e-09	3.1214e-08	down	chrA01:981396-983318:-	Serine/threonine-protein kinase SRPK	Pkinase	Protein kinase domain.
BnaA01g10810D	4.37169	1.19448	0.280188	-1.83553	2.76429e-25	5.22829e-24	down	chrA01:5403847-5407940:-	Small RNA 2'-O-methyltransferase	dsrm	Double-stranded RNA binding motif. Sequences gathered for seed by HMM_iterative_training Putative motif shared by proteins that bind to dsRNA. At least some DSRM proteins seem to bind to specific RNA targets. Exemplified by Staufen, which is involved in localisation of at least five different mRNAs in the early Drosophila embryo. Also by interferon-induced protein kinase in humans, which is part …
BnaA01g11430D	9.93198	2.69854	0.280498	-1.83394	2.26974e-15	2.47809e-14	down	chrA01:5681908-5683209:+	Quinone oxidoreductase PIG3	ADH_zinc_N	Zinc-binding dehydrogenase.
BnaA01g03350D	1.99563	0.546328	0.281359	-1.82952	1.14817e-10	8.89753e-10	down	chrA01:1588633-1594073:-	Probable ubiquitin-like-specific protease 2A	Peptidase_C48	Ulp1 protease family, C-terminal catalytic domain. This domain contains the catalytic triad Cys-His-Asn.
BnaA01g06350D	3.39553	0.930602	0.2817	-1.82777	8.25595e-15	8.68082e-14	down	chrA01:2927448-2929956:-	.	TIL	Trypsin Inhibitor like cysteine rich domain. This family contains trypsin inhibitors as well as a domain found in many extracellular proteins. The domain typically contains ten cysteine residues that form five disulphide bonds. The cysteine residues that form the disulphide bonds are 1-7, 2-6, 3-5, 4-10 and 8-9.
BnaA01g02150D	1.00476	0.277233	0.281791	-1.8273	9.89489e-07	5.05613e-06	down	chrA01:1061127-1065935:+	Protein NLP2	RWP-RK	RWP-RK domain. This domain is named RWP-RK after a conserved motif at the C terminus of the presumed domain. The domain is found in algal minus dominance proteins as well as plant proteins involved in nitrogen-controlled development.
BnaA01g06690D	4.56345	1.26027	0.282357	-1.82441	0.000329714	0.00112708	down	chrA01:3105451-3105890:-	.	DUF2448	Protein of unknown function C-terminus (DUF2448). The family DUF2349 is the N-terminal part of this family. This protein is found in eukaryotes but its function is not known.
BnaA01g07160D	4.72998	1.29605	0.282433	-1.82402	2.62925e-10	1.9697e-09	down	chrA01:3361471-3362979:+	Pre-mRNA cleavage factor Im 25 kDa subunit 1	NUDIX_2	Nucleotide hydrolase. Nudix hydrolases are found in all classes of organism and hydrolyse a wide range of organic pyrophosphates, including nucleoside di- and triphosphates, di-nucleoside and diphospho-inositol polyphosphates, nucleotide sugars and RNA caps, with varying degrees of substrate specificity.
BnaA01g06530D	15.5739	4.28614	0.282849	-1.82189	2.36028e-61	1.302e-59	down	chrA01:3025679-3028680:+	Signal recognition particle receptor subunit alpha homolog	SRP54	SRP54-type protein, GTPase domain. This family includes relatives of the G-domain of the SRP54 family of proteins.
BnaA01g11640D	4.21736	1.16185	0.284214	-1.81495	1.89025e-08	1.17669e-07	down	chrA01:5817027-5818772:-	Derlin-2.1	DER1	Der1-like family. The endoplasmic reticulum (ER) of the yeast Saccharomyces cerevisiae contains of proteolytic system able to selectively degrade misfolded lumenal secretory proteins. For examination of the components involved in this degradation process, mutants were isolated. They could be divided into four complementation groups. The mutations led to stabilisation of two different substrates f…
BnaA01g02090D	36.7817	10.2066	0.284863	-1.81166	5.24454e-139	7.96122e-137	down	chrA01:1035057-1038277:-	Calcium-dependent protein kinase 5	Pkinase	Protein kinase domain.
BnaA01g03320D	5.05379	1.40575	0.28495	-1.81122	3.3793e-30	7.82507e-29	down	chrA01:1579125-1584879:-	Dynamin-related protein 3A	Dynamin_M	Dynamin central region. This region lies between the GTPase domain, see pfam00350, and the pleckstrin homology (PH) domain, see pfam00169.
BnaA01g07550D	5.60039	1.55149	0.284988	-1.81103	1.59922e-17	2.00262e-16	down	chrA01:3516216-3518970:+	.	DUF1005	Protein of unknown function (DUF1005). Family of plant proteins with undetermined function.
BnaA01g00290D	7.90562	2.1917	0.285065	-1.81063	8.8373e-30	2.00446e-28	down	chrA01:147063-149809:-	AP2-like ethylene-responsive transcription factor ANT	AP2	AP2 domain. This 60 amino acid residue domain can bind to DNA and is found in transcription factor proteins.
BnaA01g04640D	2.53622	0.711023	0.286431	-1.80374	1.73526e-11	1.43895e-10	down	chrA01:2162638-2165507:-	.	Ist1	Regulator of Vps4 activity in the MVB pathway. ESCRT-I, -II, and -III are endosomal sorting complexes required for transporting proteins and carry out cargo sorting and vesicle formation in the multivesicular bodies, MVBs, pathway. These complexes are transiently recruited from the cytoplasm to the endosomal membrane where they bind transmembrane proteins previously marked for degradation by mono…
BnaA01g10100D	6.79563	1.89654	0.286525	-1.80327	9.47932e-54	4.44022e-52	down	chrA01:5028957-5037142:+	Cyclin-T1-4	Cyclin_N	Cyclin, N-terminal domain. Cyclins regulate cyclin dependent kinases (CDKs). Human cyclin-O is a Uracil-DNA glycosylase that is related to other cyclins. Cyclins contain two domains of similar all-alpha fold, of which this family corresponds with the N-terminal domain.
BnaA01g10070D	3.295	0.929069	0.288412	-1.7938	5.63881e-09	3.72162e-08	down	chrA01:5019501-5021648:+	Cyclin-T1-2	Cyclin_N	Cyclin, N-terminal domain. Cyclins regulate cyclin dependent kinases (CDKs). Human cyclin-O is a Uracil-DNA glycosylase that is related to other cyclins. Cyclins contain two domains of similar all-alpha fold, of which this family corresponds with the N-terminal domain.
BnaA01g01670D	9.40293	2.63861	0.288618	-1.79277	3.19985e-15	3.45584e-14	down	chrA01:888017-889646:+	Ras-related protein RABB1b	Ras	Ras family. Includes sub-families Ras, Rab, Rac, Ral, Ran, Rap Ypt1 and more. Shares P-loop motif with GTP_EFTU, arf and myosin_head. See pfam00009 pfam00025, pfam00063. As regards Rab GTPases, these are important regulators of vesicle formation, motility and fusion. They share a fold in common with all Ras GTPases: this is a six-stranded beta-sheet surrounded by five alpha-helices.
BnaA01g10500D	6.77342	1.91175	0.289359	-1.78907	2.13636e-21	3.31545e-20	down	chrA01:5233000-5236824:+	.	DUF1639	Protein of unknown function (DUF1639). This approximately 50 residue region is found in a number of sequences derived from hypothetical plant proteins. This region features a highly basic 5 amino-acid stretch towards its centre.
BnaA01g07270D	9.55544	2.71495	0.289362	-1.78905	7.92837e-29	1.74144e-27	down	chrA01:3428038-3429730:+	Venom phosphodiesterase 2	Phosphodiest	Type I phosphodiesterase / nucleotide pyrophosphatase. This family consists of phosphodiesterases, including human plasma-cell membrane glycoprotein PC-1 / alkaline phosphodiesterase i / nucleotide pyrophosphatase (nppase). These enzymes catalyse the cleavage of phosphodiester and phosphosulfate bonds in NAD, deoxynucleotides and nucleotide sugars. Also in this family is ATX an autotaxin, tumor c…
BnaA01g08310D	5.0416	1.42451	0.290246	-1.78465	6.52786e-25	1.20681e-23	down	chrA01:3951346-3954393:-	.	TPR_11	TPR repeat.
BnaA01g10460D	3.88351	1.09418	0.290689	-1.78245	9.30678e-14	9.13866e-13	down	chrA01:5220337-5222717:+	.	Glyco_transf_92	Glycosyltransferase family 92. Members of this family act as galactosyltransferases, belonging to glycosyltransferase family 92. The aligned region contains several conserved cysteine residues and several charged residues that may be catalytic residues. This is supported by the inclusion of this family in the GT-A glycosyl transferase superfamily.
BnaA01g06800D	3.37821	0.959826	0.290771	-1.78204	7.16035e-16	8.03159e-15	down	chrA01:3148897-3152927:-	NADPH--cytochrome P450 reductase 2	FAD_binding_1	FAD binding domain. This domain is found in sulfite reductase, NADPH cytochrome P450 reductase, Nitric oxide synthase and methionine synthase reductase.
BnaA01g11680D	2.26815	0.642906	0.29115	-1.78016	1.83961e-11	1.52043e-10	down	chrA01:5830175-5834708:+	Pentatricopeptide repeat-containing protein At4g21880, mitochondrial	PPR_2	PPR repeat family. This repeat has no known function. It is about 35 amino acids long and is found in up to 18 copies in some proteins. The family appears to be greatly expanded in plants and fungi. The repeat has been called PPR.
BnaA01g10760D	9.44573	2.69399	0.292551	-1.77324	4.85376e-77	3.57157e-75	down	chrA01:5361866-5370956:-	Tripeptidyl-peptidase 2	TPPII	Tripeptidyl peptidase II. This domain family is found in bacteria and eukaryotes, and is approximately 190 amino acids in length. The family is found in association with pfam00082. Tripeptidyl peptidase II (TPPII) is a crucial component of the proteolytic cascade acting downstream of the 26S proteasome in the ubiquitin-proteasome pathway. It is an amino peptidase belonging to the subtilase family…
BnaA01g04770D	5.24305	1.5016	0.29327	-1.7697	2.47545e-25	4.69499e-24	down	chrA01:2225165-2229514:-	.	PX	PX domain. PX domains bind to phosphoinositides.
BnaA01g06640D	3.23736	0.924521	0.293553	-1.76831	1.76591e-06	8.71598e-06	down	chrA01:3083776-3084876:+	.	DUF4289	Domain of unknown function (DUF4289). This family of membrane bet-barrel proteins is functionally uncharacterized. This family of proteins is found in bacteria. Proteins in this family are typically between 655 and 722 amino acids in length. One member is identified by Gene3D as a membrane bound beta-barrel.
BnaA01g01340D	5.77542	1.65459	0.294077	-1.76574	9.51725e-44	3.41571e-42	down	chrA01:706696-715008:+	MORC family CW-type zinc finger protein 3	HATPase_c_3	Histidine kinase-, DNA gyrase B-, and HSP90-like ATPase. This family represents, additionally, the structurally related ATPase domains of histidine kinase, DNA gyrase B and HSP90.
BnaA01g06780D	4.36955	1.26117	0.296094	-1.75587	0.000138757	0.000508411	down	chrA01:3141839-3143714:+	.	Syntaxin-6_N	Syntaxin 6, N-terminal. Members of this family, which are found in the amino terminus of various SNARE proteins, adopt a structure consisting of an antiparallel three-helix bundle. Their exact function has not been determined, though it is known that they regulate the SNARE motif, as well as mediate various protein-protein interactions involved in membrane-transport.
BnaA01g07100D	3.81662	1.11004	0.296857	-1.75216	3.39224e-26	6.67152e-25	down	chrA01:3343810-3352276:+	Calcium-transporting ATPase 10, plasma membrane-type	E1-E2_ATPase	E1-E2 ATPase.
BnaA01g11060D	16.6569	4.8342	0.297175	-1.75061	1.66034e-66	1.01568e-64	down	chrA01:5500958-5506087:+	Dolichyl-diphosphooligosaccharide--protein glycosyltransferase subunit 2	Ribophorin_II	Oligosaccharyltransferase subunit Ribophorin II. This family contains eukaryotic Ribophorin II (RPN2) proteins. The mammalian oligosaccharyltransferase (OST) is a protein complex that effects the cotranslational N-glycosylation of newly synthesized polypeptides, and is composed of the following proteins: ribophorins I and II (RI and RII), OST48, and Dadl, N33/IAP, OST4, STT3. The family also incl…
BnaA01g06970D	1.66374	0.485094	0.297239	-1.7503	3.54142e-07	1.91388e-06	down	chrA01:3282384-3284557:+	Folic acid synthesis protein fol1	Pterin_bind	Pterin binding enzyme. This family includes a variety of pterin binding enzymes that all adopt a TIM barrel fold. The family includes dihydropteroate synthase EC:2.5.1.15 as well as a group methyltransferase enzymes including methyltetrahydrofolate, corrinoid iron-sulfur protein methyltransferase (MeTr) that catalyses a key step in the Wood-Ljungdahl pathway of carbon dioxide fixation. It transfe…
BnaA01g00890D	3.03018	0.877454	0.297747	-1.74784	1.21834e-09	8.58431e-09	down	chrA01:499086-501075:+	Nuclear pore complex protein NUP58	7tm_7	7tm Chemosensory receptor. This family includes a number of gustatory and odorant receptors mainly from insect species such as A. gambiae and D. melanogaster. They are classified as G-protein-coupled receptors (GPCRs), or seven-transmembrane receptors. They show high sequence divergence, consistent with an ancient origin for the family.
BnaA01g09970D	8.29895	2.40861	0.298336	-1.74499	1.18627e-39	3.78369e-38	down	chrA01:4907100-4910823:+	ABC transporter E family member 2	ABC_tran	ABC transporter. ABC transporters for a large family of proteins responsible for translocation of a variety of compounds across biological membranes. ABC transporters are the largest family of proteins in many completely sequenced bacteria. ABC transporters are composed of two copies of this domain and two copies of a transmembrane domain pfam00664. These four domains may belong to a single polyp…
BnaA01g07480D	2.05114	0.598537	0.300182	-1.73609	6.31107e-18	8.10102e-17	down	chrA01:3479335-3485604:-	Serine/threonine-protein kinase ppk19	Pkinase	Protein kinase domain.
BnaA01g06380D	2.45434	0.719857	0.300421	-1.73494	4.03293e-08	2.42936e-07	down	chrA01:2942292-2944903:+	Eukaryotic translation initiation factor isoform 4G-2	MIF4G	MIF4G domain. MIF4G is named after Middle domain of eukaryotic initiation factor 4G (eIF4G). Also occurs in NMD2p and CBP80. The domain is rich in alpha-helices and may contain multiple alpha-helical repeats. In eIF4G, this domain binds eIF4A, eIF3, RNA and DNA.
BnaA01g02180D	5.93264	1.73897	0.300716	-1.73353	3.43759e-28	7.3882e-27	down	chrA01:1082634-1085804:+	.	DUF632	Protein of unknown function (DUF632). This plant protein may be a leucine zipper, but there is no experimental evidence for this.
BnaA01g03380D	4.72339	1.38259	0.301271	-1.73087	2.0789e-20	3.05179e-19	down	chrA01:1601349-1604978:+	Potassium transporter 13	K_trans	K+ potassium transporter. This is a family of K+ potassium transporters that are conserved across phyla, having both bacterial (KUP), yeast (HAK), and plant (AtKT) sequences as members.
BnaA01g02770D	4.93477	1.45253	0.303632	-1.7196	6.81097e-20	9.76065e-19	down	chrA01:1363570-1366772:-	Probable E3 ubiquitin-protein ligase ARI1	IBR	IBR domain. The IBR (In Between Ring fingers) domain is often found to occur between pairs of ring fingers (pfam00097). This domain has also been called the C6HC domain and DRIL (for double RING finger linked) domain. Proteins that contain two Ring fingers and an IBR domain (these proteins are also termed RBR family proteins) are thought to exist in all eukaryotic organisms. RBR family members pl…
BnaA01g10620D	7.60473	2.24328	0.303855	-1.71854	1.1058e-35	3.11493e-34	down	chrA01:5299629-5303256:-	Subtilisin-like protease SBT1.7	Peptidase_S8	Subtilase family. Subtilases are a family of serine proteases. They appear to have independently and convergently evolved an Asp/Ser/His catalytic triad, like that found in the trypsin serine proteases (see pfam00089). Structure is an alpha/beta fold containing a 7-stranded parallel beta sheet, order 2314567.
BnaA01g01250D	2.02023	0.600465	0.304005	-1.71783	8.82006e-07	4.53802e-06	down	chrA01:648840-651902:+	Long chain base biosynthesis protein 1	Aminotran_1_2	Aminotransferase class I and II.
BnaA01g03610D	2.9678	0.878907	0.304804	-1.71405	1.43847e-28	3.12604e-27	down	chrA01:1685545-1693089:+	1-phosphatidylinositol-3-phosphate 5-kinase FAB1A	PIP5K	Phosphatidylinositol-4-phosphate 5-Kinase. This family contains a region from the common kinase core found in the type I phosphatidylinositol-4-phosphate 5-kinase (PIP5K) family as described in. The family consists of various type I, II and III PIP5K enzymes. PIP5K catalyses the formation of phosphoinositol-4,5-bisphosphate via the phosphorylation of phosphatidylinositol-4-phosphate a precursor i…
BnaA01g10370D	16.4824	4.92955	0.304989	-1.71317	7.61764e-16	8.53518e-15	down	chrA01:5180215-5181178:+	Multiple RNA-binding domain-containing protein 1	RRM_6	RNA recognition motif (a.k.a. RRM, RBD, or RNP domain).
BnaA01g05410D	68.3562	20.3144	0.305056	-1.71285	6.59504e-75	4.62059e-73	down	chrA01:2522160-2523212:-	Glycine-rich RNA-binding protein 10	RRM_1	RNA recognition motif. (a.k.a. RRM, RBD, or RNP domain). The RRM motif is probably diagnostic of an RNA binding protein. RRMs are found in a variety of RNA binding proteins, including various hnRNP proteins, proteins implicated in regulation of alternative splicing, and protein components of snRNPs. The motif also appears in a few single stranded DNA binding proteins. The RRM structure consists o…
BnaA01g01100D	7.46806	2.23437	0.305435	-1.71106	5.8499e-15	6.22764e-14	down	chrA01:594146-596359:+	G-box-binding factor 1	MFMR	G-box binding protein MFMR. This region is found to the N-terminus of the pfam00170 transcription factor domain. It is between 150 and 200 amino acids in length. The N-terminal half is rather rich in proline residues and has been termed the PRD (proline rich domain), whereas the C-terminal half is more polar and has been called the MFMR (multifunctional mosaic region). It has been suggested that …
BnaA01g04880D	1.74246	0.516745	0.305745	-1.7096	7.03294e-05	0.000271398	down	chrA01:2261364-2263829:-	.	O-ag_pol_Wzy	O-antigen polysaccharide polymerase Wzy. This family includes O-antigen polysaccharide polymerases. These enzymes link O-units via a glycosidic linkage to form a long O-antigen. These enzymes vary in specificity and sequence.
BnaA01g09810D	1.27219	0.383489	0.306253	-1.70721	0.0117971	0.0281082	down	chrA01:4822167-4824727:-	4-coumarate--CoA ligase-like 6	AMP-binding	AMP-binding enzyme.
BnaA01g06820D	29.4841	8.82203	0.306483	-1.70612	1.91526e-154	3.42789e-152	down	chrA01:3187746-3192639:+	ATPase 2, plasma membrane-type	E1-E2_ATPase	E1-E2 ATPase.
BnaA01g11310D	4.58227	1.37221	0.308432	-1.69698	9.9446e-11	7.75032e-10	down	chrA01:5634702-5636798:+	Vesicle-associated protein 4-2	Motile_Sperm	MSP (Major sperm protein) domain. Major sperm proteins are involved in sperm motility. These proteins oligomerise to form filaments. This family contains many other proteins.
BnaA01g10410D	2.1736	0.65522	0.308562	-1.69637	4.17698e-09	2.79005e-08	down	chrA01:5195682-5197721:-	Pentatricopeptide repeat-containing protein At4g20090	PPR_2	PPR repeat family. This repeat has no known function. It is about 35 amino acids long and is found in up to 18 copies in some proteins. The family appears to be greatly expanded in plants and fungi. The repeat has been called PPR.
BnaA01g00850D	3.24416	0.983376	0.310812	-1.68589	1.4429e-12	1.30348e-11	down	chrA01:485306-488142:+	.	DUF547	Protein of unknown function, DUF547. Family of uncharacterized proteins from C. elegans and A. thaliana.
BnaA01g01790D	4.30624	1.30665	0.311321	-1.68353	6.58529e-12	5.65719e-11	down	chrA01:931390-933692:+	Thiol-disulfide oxidoreductase LTO1	VKOR	Vitamin K epoxide reductase family. Vitamin K epoxide reductase (VKOR) recycles reduced vitamin K, which is used subsequently as a co-factor in the gamma-carboxylation of glutamic acid residues in blood coagulation enzymes. VKORC1 is a member of a large family of predicted enzymes that are present in vertebrates, Drosophila, plants, bacteria and archaea. Four cysteine residues and one residue, wh…
BnaA01g04360D	7.03553	2.13893	0.311578	-1.68234	1.30809e-43	4.6783e-42	down	chrA01:2014402-2022378:-	Protein transport protein Sec24-like At4g32640	Sec23_trunk	Sec23/Sec24 trunk domain. COPII-coated vesicles carry proteins from the endoplasmic reticulum to the Golgi complex. This vesicular transport can be reconstituted by using three cytosolic components containing five proteins: the small GTPase Sar1p, the Sec23p/24p complex, and the Sec13p/Sec31p complex. This domain is known as the trunk domain and has an alpha/beta vWA fold and forms the dimer inte…
BnaA01g09920D	3.8293	1.16765	0.31238	-1.67863	3.38472e-10	2.50997e-09	down	chrA01:4890583-4893208:-	WAT1-related protein At4g19185	EamA	EamA-like transporter family. This family includes many hypothetical membrane proteins of unknown function. Many of the proteins contain two copies of the aligned region. The family used to be known as DUF6.
BnaA01g08540D	3.59043	1.10228	0.313353	-1.67414	3.62384e-10	2.67712e-09	down	chrA01:4081961-4083700:+	Coenzyme Q-binding protein COQ10 homolog A, mitochondrial	Polyketide_cyc	Polyketide cyclase / dehydrase and lipid transport. This family contains polyketide cylcases/dehydrases which are enzymes involved in polyketide synthesis. The family also includes proteins which are involved in the binding/transport of lipids.
BnaA01g03060D	10.7499	3.28378	0.313725	-1.67243	1.85811e-63	1.0864e-61	down	chrA01:1474541-1479049:-	Probable E3 ubiquitin ligase SUD1	RINGv	RING-variant domain.
BnaA01g08950D	5.85209	1.79873	0.31429	-1.66983	3.58725e-25	6.72585e-24	down	chrA01:4346057-4349850:+	.	DUF1296	Protein of unknown function (DUF1296). This family represents a conserved region approximately 60 residues long within a number of plant proteins of unknown function. Structural modelling suggests this domain may bind nucleic acids.
BnaA01g03790D	19.0331	5.83679	0.314574	-1.66853	3.37129e-90	2.95879e-88	down	chrA01:1755592-1760092:+	Aminopeptidase M1	Peptidase_M1	Peptidase family M1. Members of this family are aminopeptidases. The members differ widely in specificity, hydrolysing acidic, basic or neutral N-terminal residues. This family includes leukotriene-A4 hydrolase, this enzyme also has an aminopeptidase activity.
BnaA01g09710D	9.845	3.02128	0.314885	-1.6671	1.81967e-28	3.93983e-27	down	chrA01:4775658-4778921:+	Uncharacterized WD repeat-containing protein C17D11.16	WD40	WD domain, G-beta repeat.
BnaA01g06670D	4.72398	1.45469	0.316206	-1.66106	8.44947e-20	1.20456e-18	down	chrA01:3095672-3099840:+	Cyclic nucleotide-gated ion channel 17	Ion_trans	Ion transport protein. This family contains Sodium, Potassium, Calcium ion channels. This family is 6 transmembrane helices in which the last two helices flank a loop which determines ion selectivity. In some sub-families (e.g. Na channels) the domain is repeated four times, whereas in others (e.g. K channels) the protein forms as a tetramer in the membrane. A bacterial structure of the protein i…
BnaA01g04760D	2.02129	0.626828	0.318705	-1.64971	1.6152e-11	1.34417e-10	down	chrA01:2219583-2225096:+	Pantothenate kinase 2	Fumble	Fumble. Fumble is required for cell division in Drosophila. Mutants lacking fumble exhibit abnormalities in bipolar spindle organisation, chromosome segregation, and contractile ring formation. Analyses have demonstrated that encodes three protein isoforms, all of which contain a domain with high similarity to the pantothenate kinases of A. nidulans and mouse. A role of fumble in membrane synthes…
BnaA01g00440D	2.65557	0.825169	0.319252	-1.64723	1.67366e-16	1.95655e-15	down	chrA01:242845-249815:+	Suppressor of RPS4-RLD 1	TPR_11	TPR repeat.
BnaA01g11320D	8.54271	2.65761	0.319883	-1.64439	7.33874e-20	1.0506e-18	down	chrA01:5636957-5639090:+	Bifunctional riboflavin kinase/FMN phosphatase	Flavokinase	Riboflavin kinase. This family represents the C-terminal region of the bifunctional riboflavin biosynthesis protein known as RibC in Bacillus subtilis. The RibC protein from Bacillus subtilis has both flavokinase and flavin adenine dinucleotide synthetase (FAD-synthetase) activities. RibC plays an essential role in the flavin metabolizm. This domain is thought to have kinase activity.
BnaA01g11630D	12.6552	3.95592	0.321053	-1.63912	1.32477e-35	3.71644e-34	down	chrA01:5814645-5816836:+	GPN-loop GTPase 1	ATP_bind_1	Conserved hypothetical ATP binding protein. Members of this family are found in a range of archaea and eukaryotes and have hypothesised ATP binding activity.
BnaA01g02670D	18.0291	5.64009	0.321372	-1.63768	7.14568e-87	5.9527e-85	down	chrA01:1326690-1331673:-	Coatomer subunit gamma	Adaptin_N	Adaptin N terminal region. This family consists of the N terminal region of various alpha, beta and gamma subunits of the AP-1, AP-2 and AP-3 adaptor protein complexes. The adaptor protein (AP) complexes are involved in the formation of clathrin-coated pits and vesicles. The N-terminal region of the various adaptor proteins (APs) is constant by comparison to the C-terminal which is variable withi…
BnaA01g10580D	5.81902	1.81904	0.321525	-1.637	1.53365e-10	1.17295e-09	down	chrA01:5288017-5289864:+	Protein LSD1	zf-LSD1	LSD1 zinc finger. This family consists of several plant specific LSD1 zinc finger domains. Arabidopsis lsd1 mutants are hyper-responsive to cell death initiators and fail to limit the extent of cell death. Superoxide is a necessary and sufficient signal for cell death propagation. LSD1 monitors a superoxide-dependent signal and negatively regulates a plant cell death pathway. LSD1 protein contain…
BnaA01g05840D	1.45009	0.454801	0.322111	-1.63437	4.4356e-07	2.3721e-06	down	chrA01:2715387-2719090:-	Uncharacterized aarF domain-containing protein kinase At4g31390, chloroplastic	ABC1	ABC1 family. This family includes ABC1 from yeast and AarF from Escherichia coli. These proteins have a nuclear or mitochondrial subcellular location in eukaryotes. The exact molecular functions of these proteins is not clear, however yeast ABC1 suppresses a cytochrome b mRNA translation defect and is essential for the electron transfer in the bc 1 complex and Escherichia coli AarF is required fo…
BnaA01g11390D	8.69201	2.73213	0.322337	-1.63336	3.45486e-20	5.01952e-19	down	chrA01:5668629-5670443:-	Vacuolar protein sorting-associated protein 28 homolog 1	VPS28	VPS28 protein.
BnaA01g01650D	6.06649	1.90376	0.322585	-1.63225	8.54492e-21	1.28569e-19	down	chrA01:874669-878093:-	La-related protein 1C	La	La domain. This presumed domain is found at the N-terminus of La RNA-binding proteins as well as other proteins. The function of this region is uncertain.
BnaA01g11490D	6.98103	2.21118	0.3234	-1.62861	8.04658e-22	1.28077e-20	down	chrA01:5700158-5704702:-	Splicing factor 3B subunit 2	DUF382	Domain of unknown function (DUF382). This domain is specific to the human splicing factor 3b subunit 2 and it's orthologues. Splicing factor 3b subunit 2 or SAP145 is a suppressor of U2 snRNA mutations. Pre-mRNA splicing is catalysed by a large ribonucleoprotein complex called the spliceosome. Spliceosomes are multi-component enzymes that catalyse pre-mRNA splicing and form step-wise by the order…
BnaA01g03420D	1.86494	0.58437	0.32372	-1.62718	1.22877e-05	5.35998e-05	down	chrA01:1622857-1624297:+	Protein ROOT PRIMORDIUM DEFECTIVE 1	PORR	Plant organelle RNA recognition domain. This family, which was previously known as DUF860, has been shown to be a component of group II intron ribonucleoprotein particles in maize chloroplasts. The domain is required for the splicing of the introns with which it associates, and promotes splicing in the context of a heterodimer with the RNase III-domain protein RNC1. All of the members are predict…
BnaA01g04550D	19.8677	6.28306	0.324	-1.62594	3.74418e-46	1.43286e-44	down	chrA01:2125820-2128452:+	.	DUF642	Protein of unknown function (DUF642). This family represents a duplicated conserved region found in a number of uncharacterized plant proteins, potentially in the stem. There is a conserved CGP sequence motif.
BnaA01g00010D	57.457	18.1182	0.324011	-1.62588	1.03551e-52	4.71048e-51	down	chrA01:831-1437:+	Probable signal peptidase complex subunit 1	SPC12	Microsomal signal peptidase 12 kDa subunit (SPC12). This family consists of several microsomal signal peptidase 12 kDa subunit proteins. Translocation of polypeptide chains across the endoplasmic reticulum (ER) membrane is triggered by signal sequences. Subsequently, signal recognition particle interacts with its membrane receptor and the ribosome-bound nascent chain is targeted to the ER where i…
BnaA01g04200D	7.1651	2.26399	0.324379	-1.62425	1.59741e-28	3.46592e-27	down	chrA01:1940686-1945243:-	TOM1-like protein 2	VHS	VHS domain. Domain present in VPS-27, Hrs and STAM.
BnaA01g00660D	5.29227	1.68531	0.327121	-1.61211	1.50302e-24	2.72458e-23	down	chrA01:355880-360183:+	Probable cadmium/zinc-transporting ATPase HMA1, chloroplastic	E1-E2_ATPase	E1-E2 ATPase.
BnaA01g00410D	1.13614	0.365104	0.327456	-1.61063	0.00240369	0.00684672	down	chrA01:228257-229939:-	Peroxidase 50	peroxidase	Peroxidase.
BnaA01g00430D	8.17108	2.64377	0.329024	-1.60374	6.99705e-16	7.85487e-15	down	chrA01:236634-238521:+	Cyclin-B1-1	Cyclin_N	Cyclin, N-terminal domain. Cyclins regulate cyclin dependent kinases (CDKs). Human cyclin-O is a Uracil-DNA glycosylase that is related to other cyclins. Cyclins contain two domains of similar all-alpha fold, of which this family corresponds with the N-terminal domain.
BnaA01g01150D	7.84484	2.52977	0.329542	-1.60146	2.46538e-12	2.18762e-11	down	chrA01:612254-613786:+	.	DUF1195	Protein of unknown function (DUF1195). This family consists of several plant specific hypothetical proteins of around 160 residues in length. The function of this family is unknown.
BnaA01g11650D	3.87957	1.24616	0.329876	-1.6	3.0196e-23	5.14386e-22	down	chrA01:5820561-5826589:+	Abnormal spindle-like microcephaly-associated protein homolog	CH	Calponin homology (CH) domain. The CH domain is found in both cytoskeletal proteins and signal transduction proteins. The CH domain is involved in actin binding in some members of the family. However in calponins there is evidence that the CH domain is not involved in its actin binding activity. Most member proteins have from two to four copies of the CH domain, however some proteins such as calp…
BnaA01g09930D	4.87431	1.56677	0.329973	-1.59958	5.23952e-17	6.34595e-16	down	chrA01:4893375-4896280:+	Uncharacterized zinc finger CCHC domain-containing protein At4g19190	Cir_N	N-terminal domain of CBF1 interacting co-repressor CIR. This is a 45 residue conserved region at the N-terminal end of a family of proteins referred to as CIRs (CBF1-interacting co-repressors). CBF1 (centromere-binding factor 1) acts as a transcription factor that causes repression by binding specifically to GTGGGAA motifs in responsive promoters, and it requires CIR as a co-repressor. CIR binds …
BnaA01g09420D	2.44076	0.78377	0.330002	-1.59945	9.88152e-12	8.37651e-11	down	chrA01:4608404-4613282:-	Scar-like domain-containing protein WAVE 5	FAM117	Protein Family FAM117. This protein family is a domain of unknown function found in eukaryotes. Proteins in this family are typically between 269 and 453 amino acids in length. There are two conserved sequence motifs: RRT and TQT.
BnaA01g11440D	10.4606	3.38373	0.330078	-1.59912	1.09158e-08	6.98506e-08	down	chrA01:5683289-5683798:+	.	ADH_zinc_N_2	Zinc-binding dehydrogenase.
BnaA01g02620D	2.6779	0.863673	0.330207	-1.59856	2.84284e-07	1.55417e-06	down	chrA01:1306916-1308748:-	Transcription factor bHLH63	HLH	Helix-loop-helix DNA-binding domain.
BnaA01g02190D	5.64792	1.82174	0.33047	-1.59741	4.15631e-17	5.06543e-16	down	chrA01:1087445-1090623:+	Probable serine/threonine-protein kinase At4g35230	Pkinase	Protein kinase domain.
BnaA01g02980D	1.47328	0.47193	0.330572	-1.59696	0.00073363	0.00234442	down	chrA01:1452682-1454792:-	Elicitor-responsive protein 3	C2	C2 domain.
BnaA01g09760D	22.5007	7.29718	0.3312	-1.59423	3.97532e-33	1.02344e-31	down	chrA01:4799395-4803636:+	Floral homeotic protein AGAMOUS	K-box	K-box region. The K-box region is commonly found associated with SRF-type transcription factors see pfam00319. The K-box is a possible coiled-coil structure. Possible role in multimer formation.
BnaA01g05690D	10.2502	3.32043	0.332233	-1.58973	1.93278e-34	5.21849e-33	down	chrA01:2645151-2647954:-	Apoptotic chromatin condensation inducer in the nucleus	SAP	SAP domain. The SAP (after SAF-A/B, Acinus and PIAS) motif is a putative DNA/RNA binding domain found in diverse nuclear and cytoplasmic proteins.
BnaA01g06020D	7.85612	2.55547	0.333242	-1.58536	4.68358e-23	7.90288e-22	down	chrA01:2787532-2789844:+	Serine/threonine-protein kinase HT1	Pkinase_Tyr	Protein tyrosine kinase.
BnaA01g01880D	2.54837	0.827869	0.333654	-1.58358	1.08743e-05	4.78111e-05	down	chrA01:959407-961503:-	Protein RKD5	RWP-RK	RWP-RK domain. This domain is named RWP-RK after a conserved motif at the C terminus of the presumed domain. The domain is found in algal minus dominance proteins as well as plant proteins involved in nitrogen-controlled development.
BnaA01g01210D	2.77362	0.904223	0.33409	-1.58169	3.73192e-15	4.01672e-14	down	chrA01:635930-640425:+	Auxilin-like protein 1	DnaJ	DnaJ domain. DnaJ domains (J-domains) are associated with hsp70 heat-shock system and it is thought that this domain mediates the interaction. DnaJ-domain is therefore part of a chaperone (protein folding) system. The T-antigens, although not in Prosite are confirmed as DnaJ containing domains from literature.
BnaA01g09120D	6.29964	2.09998	0.338985	-1.56071	1.74587e-06	8.62851e-06	down	chrA01:4457350-4458057:-	.	LSM	LSM domain. The LSM domain contains Sm proteins as well as other related LSM (Like Sm) proteins. The U1, U2, U4/U6, and U5 small nuclear ribonucleoprotein particles (snRNPs) involved in pre-mRNA splicing contain seven Sm proteins (B/B', D1, D2, D3, E, F and G) in common, which assemble around the Sm site present in four of the major spliceosomal small nuclear RNAs. The U6 snRNP binds to the LSM (…
BnaA01g05820D	3.14825	1.04912	0.339567	-1.55823	1.9782e-07	1.10296e-06	down	chrA01:2711194-2712955:+	Cytoplasmic 60S subunit biogenesis factor SPCC550.15c	zf-C2H2_2	C2H2 type zinc-finger (2 copies). This family contains two copies of a C2H2-like zinc finger domain.
BnaA01g09830D	4.53946	1.51181	0.340344	-1.55493	5.88307e-19	7.97894e-18	down	chrA01:4834624-4840576:-	Protein ENHANCED DISEASE RESISTANCE 2	DUF1336	Protein of unknown function (DUF1336). This family represents the C-terminus (approximately 250 residues) of a number of hypothetical plant proteins of unknown function.
BnaA01g12270D	4.25326	1.42762	0.342048	-1.54773	3.87929e-12	3.39446e-11	down	chrA01:6118512-6120375:-	Putative methyltransferase DDB_G0268948	Methyltransf_11	Methyltransferase domain. Members of this family are SAM dependent methyltransferases.
BnaA01g00800D	5.68231	1.90652	0.342102	-1.5475	1.33268e-11	1.11814e-10	down	chrA01:464328-466189:+	Methionine aminopeptidase 1D, chloroplastic/mitochondrial	Peptidase_M24	Metallopeptidase family M24. This family contains metallopeptidases. It also contains non-peptidase homologues such as the N terminal domain of Spt16 which is a histone H3-H4 binding module.
BnaA01g01690D	1.94177	0.646449	0.342611	-1.54536	0.000140581	0.000514407	down	chrA01:894403-895955:-	NEP1-interacting protein 1	zf-RING_2	Ring finger domain.
BnaA01g11090D	6.06325	2.0581	0.347626	-1.52439	1.31086e-19	1.84501e-18	down	chrA01:5523216-5526372:+	DnaJ protein ERDJ2B	Sec63	Sec63 Brl domain. This domain (also known as the Brl domain) is required for assembly of functional endoplasmic reticulum translocons.
BnaA01g00100D	4.52131	1.53646	0.348958	-1.51888	1.41951e-10	1.08931e-09	down	chrA01:30066-31758:-	Probable glycosyltransferase At5g03795	Exostosin	Exostosin family. The EXT family is a family of tumor suppressor genes. Mutations of EXT1 on 8q24.1, EXT2 on 11p11-13, and EXT3 on 19p have been associated with the autosomal dominant disorder known as hereditary multiple exostoses (HME). This is the most common known skeletal dysplasia. The chromosomal locations of other EXT genes suggest association with other forms of neoplasia. EXT1 and EXT2 …
BnaA01g06180D	32.6435	11.1218	0.349264	-1.51761	3.14962e-90	2.77018e-88	down	chrA01:2868417-2870372:-	CBL-interacting serine/threonine-protein kinase 6	Pkinase	Protein kinase domain.
BnaA01g12310D	4.91074	1.68649	0.351037	-1.5103	1.80762e-12	1.62223e-11	down	chrA01:6147951-6149474:-	Xyloglucan galactosyltransferase MUR3	Exostosin	Exostosin family. The EXT family is a family of tumor suppressor genes. Mutations of EXT1 on 8q24.1, EXT2 on 11p11-13, and EXT3 on 19p have been associated with the autosomal dominant disorder known as hereditary multiple exostoses (HME). This is the most common known skeletal dysplasia. The chromosomal locations of other EXT genes suggest association with other forms of neoplasia. EXT1 and EXT2 …
BnaA01g02360D	11.2021	3.84644	0.35118	-1.50972	2.05212e-20	3.01572e-19	down	chrA01:1199091-1200589:-	Chalcone synthase E	Chal_sti_synt_N	Chalcone and stilbene synthases, N-terminal domain. The C-terminal domain of Chalcone synthase is reported to be structurally similar to domains in thiolase and beta-ketoacyl synthase. The differences in activity are accounted for by differences in this N-terminal domain.
BnaA01g05770D	0.809727	0.281975	0.353396	-1.50064	0.00106787	0.00330296	down	chrA01:2698248-2701184:-	.	DUF632	Protein of unknown function (DUF632). This plant protein may be a leucine zipper, but there is no experimental evidence for this.
BnaA01g09370D	7.02583	2.42762	0.354491	-1.49618	2.19281e-20	3.21209e-19	down	chrA01:4599527-4602570:+	Protein CHUP1, chloroplastic	PsbQ	Oxygen evolving enhancer protein 3 (PsbQ). This family consists of the plant specific oxygen evolving enhancer protein 3 (PsbQ). Photosystem II (PSII)1 is a pigment-protein complex, which consists of at least 25 different protein subunits, at present denoted PsbA-Z according to the genes that encode them. PsbQ plays an important role in the lumenal oxygen-evolving activity of PSII from higher pla…
BnaA01g07910D	8.71484	3.01529	0.356207	-1.48921	2.91414e-31	7.00932e-30	down	chrA01:3737025-3741726:+	Peroxisomal fatty acid beta-oxidation multifunctional protein AIM1	3HCDH_N	3-hydroxyacyl-CoA dehydrogenase, NAD binding domain. This family also includes lambda crystallin.
BnaA01g05140D	1.1755	0.411044	0.357392	-1.48442	0.000131613	0.000484576	down	chrA01:2405121-2407901:+	Ubiquitin carboxyl-terminal hydrolase 18	UCH	Ubiquitin carboxyl-terminal hydrolase.
BnaA01g04000D	9.6663	3.3722	0.358002	-1.48196	5.81992e-26	1.13104e-24	down	chrA01:1829647-1832349:+	Vacuolar-processing enzyme gamma-isozyme	Peptidase_C13	Peptidase C13 family. Members of this family are asparaginyl peptidases. The blood fluke parasite Schistosoma mansoni has at least five Clan CA cysteine peptidases in its digestive tract including cathepsins B (2 isoforms), C, F and L. All have been recombinantly expressed as active enzymes, albeit in various stages of activation. In addition, a Clan CD peptidase, termed asparaginyl endopeptidase…
BnaA01g05080D	9.46462	3.31107	0.358024	-1.48187	1.97309e-26	3.91617e-25	down	chrA01:2379303-2381869:-	Monogalactosyldiacylglycerol synthase 1, chloroplastic	MGDG_synth	Monogalactosyldiacylglycerol (MGDG) synthase. This family represents a conserved region of approximately 180 residues within plant and bacterial monogalactosyldiacylglycerol (MGDG) synthase (EC:2.4.1.46). In Arabidopsis, there are two types of MGDG synthase which differ in their N-terminal portion: type A and type B.
BnaA01g09890D	12.8613	4.48385	0.35808	-1.48165	1.89676e-36	5.46315e-35	down	chrA01:4875010-4877755:+	.	Transglut_core2	Transglutaminase-like superfamily.
BnaA01g07420D	2.58463	0.902564	0.358188	-1.48121	7.68455e-12	6.56849e-11	down	chrA01:3466609-3470468:+	IST1 homolog	Ist1	Regulator of Vps4 activity in the MVB pathway. ESCRT-I, -II, and -III are endosomal sorting complexes required for transporting proteins and carry out cargo sorting and vesicle formation in the multivesicular bodies, MVBs, pathway. These complexes are transiently recruited from the cytoplasm to the endosomal membrane where they bind transmembrane proteins previously marked for degradation by mono…
BnaA01g04590D	4.79134	1.67318	0.358933	-1.47821	2.0545e-17	2.55324e-16	down	chrA01:2141722-2146521:+	Peptidyl-prolyl cis-trans isomerase CYP95	Pro_isomerase	Cyclophilin type peptidyl-prolyl cis-trans isomerase/CLD. The peptidyl-prolyl cis-trans isomerases, also known as cyclophilins, share this domain of about 109 amino acids. Cyclophilins have been found in all organisms studied so far and catalyse peptidyl-prolyl isomerization during which the peptide bond preceding proline (the peptidyl-prolyl bond) is stabilized in the cis conformation. Mammalian…
BnaA01g03390D	1.18806	0.416972	0.359107	-1.47751	1.38797e-06	6.96636e-06	down	chrA01:1605201-1610344:-	Copper-transporting ATPase PAA1, chloroplastic	E1-E2_ATPase	E1-E2 ATPase.
BnaA01g07190D	1.96643	0.688778	0.359909	-1.4743	5.60746e-13	5.22691e-12	down	chrA01:3373662-3381361:-	.	Mating_C	C-terminal domain of homeodomain 1. Mating in fungi is controlled by the loci that determine the mating type of an individual, and only individuals with differing mating types can mate. Basidiomycete fungi have evolved a unique mating system, termed tetrapolar or bifactorial incompatibility, in which mating type is determined by two unlinked loci; compatibility at both loci is required for mating…
BnaA01g01660D	7.79533	2.72704	0.360101	-1.47353	2.41329e-21	3.73391e-20	down	chrA01:884126-886777:-	Aspartic proteinase-like protein 1	TAXi_N	Xylanase inhibitor N-terminal. The N- and C-termini of the members of this family are jointly necessary for creating the catalytic pocket necessary for cleaving xylanase. Phytopathogens produce xylanase that destroys plant cells, so its destruction through proteolysis is vital for plant-survival.
BnaA01g11130D	5.76434	2.02615	0.361996	-1.46595	4.92925e-12	4.27397e-11	down	chrA01:5547109-5548783:+	Pyruvate, phosphate dikinase regulatory protein 1, chloroplastic	Kinase-PPPase	Kinase/pyrophosphorylase. This family of regulatory proteins has ADP-dependent kinase and inorganic phosphate-dependent pyrophosphorylase activity.
BnaA01g06600D	1.39458	0.488106	0.362445	-1.46417	0.010647	0.0257224	down	chrA01:3053044-3053792:+	.	DNA_pack_C	Probable DNA packing protein, C-terminus. This family includes proteins that are probably involved in DNA packing in herpesvirus. This domain is found at the C-terminus of the protein.
BnaA01g10780D	7.83805	2.78875	0.364646	-1.45543	1.16442e-20	1.73862e-19	down	chrA01:5392562-5394801:-	Dihydroceramide fatty acyl 2-hydroxylase FAH2	FA_hydroxylase	Fatty acid hydroxylase superfamily. This superfamily includes fatty acid and carotene hydroxylases and sterol desaturases. Beta-carotene hydroxylase is involved in zeaxanthin synthesis by hydroxylating beta-carotene, but the enzyme may be involved in other pathways. This family includes C-5 sterol desaturase and C-4 sterol methyl oxidase. Members of this family are involved in cholesterol biosynt…
BnaA01g00340D	1.58999	0.567644	0.365244	-1.45307	3.93156e-05	0.000158243	down	chrA01:178788-181369:+	Probable amino-acid acetyltransferase NAGS2, chloroplastic	Acetyltransf_1	Acetyltransferase (GNAT) family. This family contains proteins with N-acetyltransferase functions such as Elp3-related proteins.
BnaA01g08270D	1.09686	0.394133	0.366876	-1.44663	1.92609e-05	8.16619e-05	down	chrA01:3939095-3942270:+	MDIS1-interacting receptor like kinase 1	Pkinase	Protein kinase domain.
BnaA01g07920D	2.01863	0.729049	0.368265	-1.44118	1.92674e-07	1.07632e-06	down	chrA01:3741875-3745039:-	Protein tesmin/TSO1-like CXC 5	TCR	Tesmin/TSO1-like CXC domain, cysteine-rich domain. This family includes proteins that have two copies of a cysteine rich motif as follows: C-X-C-X4-C-X3-YC-X-C-X6-C-X3-C-X-C-X2-C. The family includes Tesmin and TSO1. This family is called a CXC domain in.
BnaA01g04470D	3.06473	1.09641	0.368338	-1.4409	5.93376e-06	2.71339e-05	down	chrA01:2074798-2077059:-	Coiled-coil domain-containing protein 93	IncA	IncA protein. Chlamydia trachomatis is an obligate intracellular bacterium that develops within a parasitophorous vacuole termed an inclusion. The inclusion is non-fusogenic with lysosomes but intercepts lipids from a host cell exocytic pathway. Initiation of chlamydial development is concurrent with modification of the inclusion membrane by a set of C. trachomatis-encoded proteins collectively d…
BnaA01g08900D	15.6703	5.67113	0.371731	-1.42767	8.47635e-52	3.78444e-50	down	chrA01:4327135-4331622:-	Probable methyltransferase PMT14	Methyltransf_29	Putative S-adenosyl-L-methionine-dependent methyltransferase. This family is a putative S-adenosyl-L-methionine (SAM)-dependent methyltransferase.
BnaA01g11360D	3.37796	1.22545	0.37367	-1.42016	1.29961e-07	7.40936e-07	down	chrA01:5653799-5656703:-	Telomerase Cajal body protein 1	WD40	WD domain, G-beta repeat.
BnaA01g02630D	7.641	2.78551	0.374443	-1.41718	3.61156e-17	4.42389e-16	down	chrA01:1312897-1315852:+	Probable receptor-like serine/threonine-protein kinase At4g34500	Pkinase	Protein kinase domain.
BnaA01g03080D	4.56927	1.69296	0.378833	-1.40037	0.000252439	0.000883297	down	chrA01:1489499-1490590:+	.	Pox_P4B	Poxvirus P4B major core protein.
BnaA01g06340D	3.13829	1.17709	0.383805	-1.38155	1.67433e-14	1.72857e-13	down	chrA01:2923421-2927356:+	.	ATG11	Autophagy-related protein 11. The function of this family is conflicting. In the fission yeast, Schizosaccharomyces pombe, this protein has been shown to interact with the telomere cap complex. However, in budding yeast, Saccharomyces cerevisiae, this protein is called ATG11 and is shown to be involved in autophagy.
BnaA01g07000D	1.8939	0.712668	0.385623	-1.37474	8.71505e-12	7.41684e-11	down	chrA01:3292588-3297450:-	TBC1 domain family member 5 homolog A	RabGAP-TBC	Rab-GTPase-TBC domain. Identification of a TBC domain in GYP6_YEAST and GYP7_YEAST, which are GTPase activator proteins of yeast Ypt6 and Ypt7, implies that these domains are GTPase activator proteins of Rab-like small GTPases.
BnaA01g05130D	39.9217	15.0038	0.385716	-1.37439	1.20164e-53	5.59026e-52	down	chrA01:2403005-2404703:+	40S ribosomal protein S6-1	Ribosomal_S6e	Ribosomal protein S6e.
BnaA01g01170D	4.1467	1.57561	0.386096	-1.37297	3.69664e-06	1.7433e-05	down	chrA01:615223-616280:+	Acidic leucine-rich nuclear phosphoprotein 32-related protein	LRR_8	Leucine rich repeat.
BnaA01g04800D	3.8206	1.45893	0.390366	-1.3571	6.83133e-07	3.56764e-06	down	chrA01:2236319-2238836:+	Hydroxyproline O-galactosyltransferase HPGT2	Galactosyl_T	Galactosyltransferase. This family includes the galactosyltransferases UDP-galactose:2-acetamido-2-deoxy-D-glucose3beta-galactosyltransferase and UDP-Gal:beta-GlcNAc beta 1,3-galactosyltranferase. Specific galactosyltransferases transfer galactose to GlcNAc terminal chains in the synthesis of the lacto-series oligosaccharides types 1 and 2.
BnaA01g01410D	2.35569	0.914198	0.395829	-1.33705	1.45393e-07	8.24446e-07	down	chrA01:749986-754276:-	Transmembrane and coiled-coil domain-containing protein 4	DUF726	Protein of unknown function (DUF726). This family consists of several uncharacterized eukaryotic proteins.
BnaA01g03670D	1.23534	0.479759	0.397944	-1.32936	0.00317892	0.00879693	down	chrA01:1724300-1725576:-	F-box only protein 13	F-box	F-box domain. This domain is approximately 50 amino acids long, and is usually found in the N-terminal half of a variety of proteins. Two motifs that are commonly found associated with the F-box domain are the leucine rich repeats (LRRs; pfam00560 and pfam07723) and the WD repeat (pfam00400). The F-box domain has a role in mediating protein-protein interactions in a variety of contexts, such as p…
BnaA01g04570D	1.50363	0.589854	0.400983	-1.31839	8.83646e-05	0.000335157	down	chrA01:2132740-2135684:-	.	Agenet	Agenet domain. This domain is related to the TUDOR domain pfam00567. The function of the agenet domain is unknown. This family currently only matches one of the two Agenet domains in the FMR proteins.
BnaA01g03340D	6.26803	2.47441	0.402783	-1.31192	1.87479e-06	9.21566e-06	down	chrA01:1587155-1588543:+	.	COPI_assoc	COPI associated protein. Proteins in this family colocalize with COPI vesicle coat proteins.
BnaA01g12090D	2.89416	1.15765	0.406721	-1.29789	5.89029e-07	3.10468e-06	down	chrA01:6052122-6054890:+	.	DUF3537	Protein of unknown function (DUF3537). This family of transmembrane proteins are functionally uncharacterized. This protein is found in eukaryotes. Proteins in this family are typically between 427 to 453 amino acids in length.
BnaA01g09720D	1.19248	0.473575	0.407815	-1.29401	0.00721161	0.0182555	down	chrA01:4783530-4785823:+	Aquaporin NIP1-2	MIP	Major intrinsic protein. MIP (Major Intrinsic Protein) family proteins exhibit essentially two distinct types of channel properties: (1) specific water transport by the aquaporins, and (2) small neutral solutes transport, such as glycerol by the glycerol facilitators.
BnaA01g09910D	2.4677	0.985345	0.409203	-1.28911	8.54136e-09	5.53568e-08	down	chrA01:4887093-4889981:-	Probable apyrase 7	GDA1_CD39	GDA1/CD39 (nucleoside phosphatase) family.
BnaA01g10960D	2.81246	1.12951	0.413525	-1.27395	2.04679e-08	1.26971e-07	down	chrA01:5468152-5471504:+	Hydroxyproline O-galactosyltransferase GALT2	Galactosyl_T	Galactosyltransferase. This family includes the galactosyltransferases UDP-galactose:2-acetamido-2-deoxy-D-glucose3beta-galactosyltransferase and UDP-Gal:beta-GlcNAc beta 1,3-galactosyltranferase. Specific galactosyltransferases transfer galactose to GlcNAc terminal chains in the synthesis of the lacto-series oligosaccharides types 1 and 2.
BnaA01g08770D	1.34708	0.543031	0.415913	-1.26565	0.00673931	0.0171873	down	chrA01:4244336-4246535:+	.	PLATZ	PLATZ transcription factor. Plant AT-rich sequence and zinc-binding proteins (PLATZ) are zinc dependant DNA binding proteins. They bind to AT rich sequences and functions in transcriptional repression.
BnaA01g09900D	2.06604	0.831906	0.415972	-1.26544	8.19272e-06	3.6642e-05	down	chrA01:4881104-4883125:+	Probable carotenoid cleavage dioxygenase 4, chloroplastic	RPE65	Retinal pigment epithelial membrane protein. This family represents a retinal pigment epithelial membrane receptor which is abundantly expressed in retinal pigment epithelium, and binds plasma retinal binding protein. The family also includes the sequence related neoxanthin cleavage enzyme in plants and lignostilbene-alpha,beta-dioxygenase in bacteria.
BnaA01g01960D	2.26042	0.92655	0.420373	-1.25026	0.00669535	0.017089	down	chrA01:987491-988150:+	Probable E3 ubiquitin-protein ligase ATL45	zf-RING_2	Ring finger domain.
BnaA01g11790D	1.72316	0.71231	0.420472	-1.24992	5.3605e-05	0.00021089	down	chrA01:5885702-5888399:+	Calcium-dependent protein kinase 15	Pkinase	Protein kinase domain.
BnaA01g05720D	4.77452	1.95902	0.420541	-1.24968	9.85523e-07	5.03712e-06	down	chrA01:2654176-2655846:-	Photosynthetic NDH subunit of lumenal location 4, chloroplastic	FKBP_C	FKBP-type peptidyl-prolyl cis-trans isomerase.
BnaA01g05830D	1.00209	0.411909	0.420965	-1.24823	0.0111632	0.0267798	down	chrA01:2713116-2714814:-	.	DUF1644	Protein of unknown function (DUF1644). This family consists of sequences found in a number of hypothetical plant proteins of unknown function. The region of interest contains nine highly conserved cysteine residues and is approximately 160 amino acids in length, and is probably a zinc-binding domain.
BnaA01g09860D	8.73951	3.60391	0.423206	-1.24057	4.22354e-24	7.52634e-23	down	chrA01:4856846-4861713:-	Probable methyltransferase PMT21	Methyltransf_29	Putative S-adenosyl-L-methionine-dependent methyltransferase. This family is a putative S-adenosyl-L-methionine (SAM)-dependent methyltransferase.
BnaA01g10360D	17.3355	7.25166	0.429376	-1.21969	4.3256e-29	9.60396e-28	down	chrA01:5177982-5179997:-	DAG protein, chloroplastic	Inhibitor_I9	Peptidase inhibitor I9. This family includes the proteinase B inhibitor from Saccharomyces cerevisiae and the activation peptides from peptidases of the subtilisin family. The subtilisin propeptides are known to function as molecular chaperones, assisting in the folding of the mature peptidase, but have also been shown to act as 'temporary inhibitors'.
BnaA01g11530D	10.4054	4.40463	0.433759	-1.20503	6.57813e-05	0.000255096	down	chrA01:5752111-5758598:-	DNA-directed RNA polymerase II subunit 2	RNA_pol_Rpb2_1	RNA polymerase beta subunit. RNA polymerases catalyse the DNA dependent polymerization of RNA. Prokaryotes contain a single RNA polymerase compared to three in eukaryotes (not including mitochondrial. and chloroplast polymerases). This domain forms one of the two distinctive lobes of the Rpb2 structure. This domain is also known as the protrusion domain. The other lobe (pfam04561) is nested withi…
BnaA01g01360D	12.2564	5.20665	0.434435	-1.20279	6.31113e-20	9.06335e-19	down	chrA01:724079-727023:-	Aldehyde dehydrogenase family 3 member F1	Aldedh	Aldehyde dehydrogenase family. This family of dehydrogenases act on aldehyde substrates. Members use NADP as a cofactor. The family includes the following members: The prototypical members are the aldehyde dehydrogenases EC:1.2.1.3. Succinate-semialdehyde dehydrogenase EC:1.2.1.16. Lactaldehyde dehydrogenase EC:1.2.1.22. Benzaldehyde dehydrogenase EC:1.2.1.28. Methylmalonate-semialdehyde dehydrog…
BnaA01g05370D	2.05913	0.871418	0.43475	-1.20174	2.70671e-05	0.000112092	down	chrA01:2511846-2514315:-	.	zf-RING_5	zinc-RING finger domain.
BnaA01g06910D	1.26803	0.539311	0.436453	-1.1961	0.000453852	0.00151257	down	chrA01:3255750-3258976:+	Auxin response factor 16	Auxin_resp	Auxin response factor. A conserved region of auxin-responsive transcription factors.
BnaA01g00390D	8.53026	3.63705	0.436479	-1.19601	8.03943e-16	8.99301e-15	down	chrA01:214811-217210:-	Formamidase	FmdA_AmdA	Acetamidase/Formamidase family. This family includes amidohydrolases of formamide EC:3.5.1.49 and acetamide. Methylophilus methylotrophus fmdA forms a homotrimer suggesting all the members of this family also do.
BnaA01g00400D	1.13623	0.490262	0.438086	-1.19071	0.0194968	0.0435736	down	chrA01:220575-221824:+	LOB domain-containing protein 39	DUF260	Protein of unknown function DUF260.
BnaA01g01700D	5.92932	2.54641	0.43916	-1.18718	1.13929e-18	1.51804e-17	down	chrA01:898955-903827:+	Aconitate hydratase 1	Aconitase	Aconitase family (aconitate hydratase).
BnaA01g04670D	2.54165	1.09212	0.441003	-1.18114	5.22985e-09	3.46397e-08	down	chrA01:2181108-2184205:-	G-type lectin S-receptor-like serine/threonine-protein kinase SD2-5	Pkinase	Protein kinase domain.
BnaA01g02820D	1.37835	0.59841	0.443356	-1.17346	0.000253587	0.00088682	down	chrA01:1387143-1391259:-	DNA damage-binding protein 2	LRR_9	Leucine-rich repeat.
BnaA01g03270D	11.8457	5.12909	0.443659	-1.17248	1.57118e-17	1.96871e-16	down	chrA01:1568964-1571855:+	DUF21 domain-containing protein At4g33700	DUF21	Domain of unknown function DUF21. This transmembrane region has no known function. Many of the sequences in this family are annotated as hemolysins, however this is due to a similarity to Treponema hyodysenteriae hemolysin C that does not contain this domain. This domain is found in the N-terminus of the proteins adjacent to two intracellular CBS domains pfam00571.
BnaA01g03230D	3.03225	1.32236	0.445335	-1.16704	4.18248e-08	2.51612e-07	down	chrA01:1553956-1557611:+	Aspartate--tRNA(Asp/Asn) ligase	tRNA-synt_2	tRNA synthetases class II (D, K and N).
BnaA01g11840D	8.97669	3.92718	0.447405	-1.16035	2.61117e-13	2.48425e-12	down	chrA01:5912556-5914212:-	5'-adenylylsulfate reductase 3, chloroplastic	PAPS_reduct	Phosphoadenosine phosphosulfate reductase family. This domain is found in phosphoadenosine phosphosulfate (PAPS) reductase enzymes or PAPS sulfotransferase. PAPS reductase is part of the adenine nucleotide alpha hydrolases superfamily also including N type ATP PPases and ATP sulphurylases. The enzyme uses thioredoxin as an electron donor for the reduction of PAPS to phospho-adenosine-phosphate (P…
BnaA01g01990D	0.970678	0.422539	0.449421	-1.15386	0.00140932	0.00424442	down	chrA01:999945-1003795:+	Chloride channel protein CLC-e	Voltage_CLC	Voltage gated chloride channel. This family of ion channels contains 10 or 12 transmembrane helices. Each protein forms a single pore. It has been shown that some members of this family form homodimers. In terms of primary structure, they are unrelated to known cation channels or other types of anion channels. Three ClC subfamilies are found in animals. ClC-1 is involved in setting and restoring …
BnaA01g08330D	5.9004	2.60235	0.45312	-1.14203	1.18536e-11	9.98518e-11	down	chrA01:3966148-3969436:-	Casein kinase 1-like protein 1	Pkinase	Protein kinase domain.
BnaA01g01970D	2.15973	0.962204	0.456027	-1.13281	2.50983e-05	0.000104435	down	chrA01:992391-995214:-	Plant intracellular Ras-group-related LRR protein 4	LRR_8	Leucine rich repeat.
BnaA01g03810D	3.46698	1.58011	0.465934	-1.1018	3.05812e-06	1.45897e-05	down	chrA01:1765023-1768002:-	Peptidyl-prolyl cis-trans isomerase CYP57	Pro_isomerase	Cyclophilin type peptidyl-prolyl cis-trans isomerase/CLD. The peptidyl-prolyl cis-trans isomerases, also known as cyclophilins, share this domain of about 109 amino acids. Cyclophilins have been found in all organisms studied so far and catalyse peptidyl-prolyl isomerization during which the peptide bond preceding proline (the peptidyl-prolyl bond) is stabilized in the cis conformation. Mammalian…
BnaA01g00050D	41.3232	18.8926	0.468202	-1.0948	4.27232e-48	1.72858e-46	down	chrA01:14270-15906:-	Homeobox-leucine zipper protein ATHB-16	HALZ	Homeobox associated leucine zipper.
BnaA01g00920D	1.3863	0.635029	0.471622	-1.0843	0.0116471	0.0277894	down	chrA01:512029-513583:+	Two-component response regulator ARR18	Myb_DNA-binding	Myb-like DNA-binding domain. This family contains the DNA binding domains from Myb proteins, as well as the SANT domain family.
BnaA01g10490D	10.7913	4.996	0.473363	-1.07898	1.0227e-10	7.96133e-10	down	chrA01:5230837-5232131:+	Transcription initiation factor TFIID subunit 11	TAFII28	hTAFII28-like protein conserved region. The general transcription factor, TFIID, consists of the TATA-binding protein (TBP) associated with a series of TBP-associated factors (TAFs) that together participate in the assembly of the transcription preinitiation complex. The conserved region is found at the C-terminal of most member proteins. The crystal structure of hTAFII28 with hTAFII18 shows that…
BnaA01g10650D	2.40697	1.10936	0.474165	-1.07654	0.000160929	0.000582827	down	chrA01:5308110-5311008:-	Probable UDP-arabinose 4-epimerase 3	Epimerase	NAD dependent epimerase/dehydratase family. This family of proteins utilize NAD as a cofactor. The proteins in this family use nucleotide-sugar substrates for a variety of chemical reactions.
BnaA01g03070D	2.44979	1.13078	0.474608	-1.07519	1.87843e-08	1.17005e-07	down	chrA01:1479502-1485870:-	DEMETER-like protein 3	RRM_DME	RRM in Demeter. This is a predicted RRM-fold domain present at the C-terminus of Demeter-like glycoslyases. These proteins are involved in DNA demethylation in plants where they catalyze removal of the 5mC base and subsequently cleave the backbone through lyase activity. Orthologs of Demeter are present in plants and stramenopiles. The RRM fold domain is predicted to facilitate interaction of the…
BnaA01g05090D	4.94855	2.28635	0.475346	-1.07295	4.43528e-07	2.3721e-06	down	chrA01:2385599-2388187:+	Probable protein phosphatase 2C 59	PP2C	Protein phosphatase 2C. Protein phosphatase 2C is a Mn++ or Mg++ dependent protein serine/threonine phosphatase.
BnaA01g01020D	11.5503	5.3847	0.479686	-1.05984	9.89501e-12	8.3862e-11	down	chrA01:560148-561444:-	Geranylgeranyl pyrophosphate synthase, chloroplastic/chromoplastic	polyprenyl_synt	Polyprenyl synthetase.
BnaA01g12560D	1.31251	0.623433	0.488816	-1.03264	0.00512477	0.0134617	down	chrA01:6302438-6304762:+	Protein FIZZY-RELATED 2	WD40	WD domain, G-beta repeat.
BnaA01g09870D	5.9501	2.85428	0.493056	-1.02018	7.13207e-07	3.71618e-06	down	chrA01:4867540-4869192:+	.	GbpC	Glucan-binding protein C. This domain is found in the Streptococcus Glucan-binding protein C (GbpC) and also in surface protein antigen (Spa)-family proteins which show sequence similarity to GbpC.
BnaA01g10800D	22.8324	11.0093	0.494654	-1.01551	1.55603e-28	3.37794e-27	down	chrA01:5401910-5403651:+	Tubulin beta-9 chain	Tubulin_C	Tubulin C-terminal domain. This family includes the tubulin alpha, beta and gamma chains. Members of this family are involved in polymer formation. Tubulins are GTPases. FtsZ can polymerize into tubes, sheets, and rings in vitro and is ubiquitous in eubacteria and archaea. Tubulin is the major component of microtubules. (The FtsZ GTPases have been split into their won family).
BnaA01g06240D	8.99999	4.34789	0.496863	-1.00908	0.0081788	0.0203853	down	chrA01:2892662-2894201:-	.	O-ag_pol_Wzy	O-antigen polysaccharide polymerase Wzy. This family includes O-antigen polysaccharide polymerases. These enzymes link O-units via a glycosidic linkage to form a long O-antigen. These enzymes vary in specificity and sequence.
BnaA01g01780D	0.632821	1.49479	2.42102	1.27561	0.013773	0.0321579	up	chrA01:930045-931130:-	Senescence-associated protein DIN1	Rhodanese	Rhodanese-like domain. Rhodanese has an internal duplication. This Pfam represents a single copy of this duplicated domain. The domain is found as a single copy in other proteins, including phosphatases and ubiquitin C-terminal hydrolases.
BnaA01g11510D	0.299445	1.0847	3.71858	1.89475	1.87631e-05	7.96998e-05	up	chrA01:5715790-5718126:-	Protein NRT1/ PTR FAMILY 7.2	PTR2	POT family. The POT (proton-dependent oligopeptide transport) family all appear to be proton dependent transporters.
BnaA01g01010D	0.462481	1.98639	4.40309	2.13852	2.55467e-06	1.2314e-05	up	chrA01:557040-558209:-	Calcium uniporter protein 1, mitochondrial	DUF607	Protein of unknown function, DUF607. This family represents a conserved region found in several uncharacterized eukaryotic proteins.
BnaA01g11760D	5.45616	33.5576	6.30834	2.65726	7.07605e-157	1.3123e-154	up	chrA01:5863534-5867151:-	Protein DETOXIFICATION 41	MatE	MatE. The MatE domain
Genes in red font represent DEGs coding auxin responsive proteins
Gene in blue font represents DEG coding a two-component response regulator ARR18
Gene in orange font represents DEG coding a WUSCHEL-related homeobox protein

## Sheet: Table S9
Table S9 The retention time and calibration curves of the standards in phytohormone profiling
Compounds	Class	Rta	Equationb	rc
5-Deoxystrigol	SL	7.33	y = 27151.91882 x + 1798.27552	0.99980
Gibberellin A9	GA	6.88	y = 0.12927 x + 9.57994e-4	0.99080
Gibberellin A24	GA	6.39	y = 0.09044 x + 0.00282	0.99948
Gibberellin A20	GA	5.37	y = 0.06532 x + 0.01690	0.99852
Gibberellin A15	GA	6.88	y = 0.07962 x + 0.00162	0.99820
1-Aminocyclopropanecarboxylic acid	ETH	0.75	y = 3.05860e4 x + 4968.00796	0.99265
trans-Zeatin-O-glucoside	CK	3.06	y = 0.08160 x + 7.78653e-5	0.99889
trans-Zeatin riboside	CK	3.55	y = 0.24624 x - 3.30312e-4	0.99975
trans-Zeatin	CK	3.15	y = 0.13053 x + 0.00331	0.99584
cis-Zeatin riboside	CK	3.64	y = 0.13295 x + 0.00372	0.99924
N6-isopentenyladenine	CK	4.15	y = 0.10836 x + 4.03271e-4	0.99993
N6-Isopentenyl-adenine-9-glucoside	CK	4.09	y = 0.23209 x + 7.10479e-4	0.99895
N6-Isopentenyl-adenine-7-glucoside	CK	3.68	y = 0.34476 x + 0.00786	0.99791
2-Methylthio-cis-zeatin riboside	CK	4.58	y = 0.20590 x - 3.09365e-4	0.99344
N-(3-Indolylacetyl)-L-valine	Auxin	5.41	y = 0.38748 x - 2.85991e-4	0.99856
N-(3-Indolylacetyl)-L-leucine	Auxin	5.79	y = 0.56460 x - 7.91360e-4	0.99951
Methyl indole-3-acetate	Auxin	6.13	y = 0.03026 x + 8.97170e-5	0.99988
L-tryptophan	Auxin	3.37	y = 10365.22120 x + 8736.59282	0.99840
Indole-3-carboxylic acid	Auxin	4.78	y = 0.01011 x + 8.25289e-4	0.99921
Indole-3-carboxaldehyde	Auxin	4.92	y = 0.03404 x + 0.00153	0.99829
Indole-3-acetyl-L-aspartic acid	Auxin	4.28	y = 0.02650 x - 6.94825e-5	0.99924
Indole-3-acetyl glycine	Auxin	4.42	y = 0.14775 x + 8.92780e-4	0.99905
Indole-3-acetyl glutamic acid	Auxin	4.4	y = 0.03279 x + 2.21378e-4	0.99954
Indole-3-acetic acid	Auxin	5.05	y = 0.00665 x + 2.50029e-4	0.99887
3-Indoleacetonitrile	Auxin	5.83	y = 0.14436 x + 0.00634	0.99276
3-Indole acetamide	Auxin	4.33	y = 0.01770 x + 5.62098e-4	0.99383
Abscisic acid	ABA	5.31	y = 0.10543 x + 4.20513e-4	0.99591
typhasterol	Brassinosteroids	6.68	y = 1.58745 x + 0.00194	0.99866
castasterone	Brassinosteroids	4.37	y = 1.05843 x + 6.52249e-4	0.99913
brassinolide	Brassinosteroids	3.51	y = 1.56603 x + 0.00225	0.99832
6-deoxocastasterone	Brassinosteroids	7.94	y = 1.08879 x + 0.00169	0.99844
28-norcastasterone	Brassinosteroids	3.70	y = 0.36296 x - 0.00164	0.99520
a: retention time
b: the calibration curve
c: coefficient of correlation

## Sheet: Table S10
Table S10 Primers used for qRT-PCR
Primer name	Primer sequence
	Forward (5' to 3')	Reverse( 5' to 3' )
Bna.Actin7p	CTATCCTCCGTCTCGATCTCGC	CTTAGCCGTCTCCAGCTCTTGC
BnaA01g01910Dp	GATTGCTATCTACGCCACTATATGTGAG	CCAATGGTTGGGTCAACATAGAGG
BnaA01g04910Dp	CCGCTACTATGATCCCAAAACAATTGG	CAGTTGGGTTGTGAGCACATCC
BnaA01g13280Dp	GGAGAGAACTCCAAAACATTTCTTCCATG	CAGCAAAGCACGATACATCCAAC
BnaA02g13460Dp	CAAGAGAGCATGAGCTGCTCAG	CGGTGAAAACACCGAGCTCG
BnaC05g04530Dp	CCCTTCTCTCCGTCTATCTCCG	CGCCGTTTGAGATGCTAACG
BnaA03g38630Dp	CTCTTGTTCATCCCTCGAAAGCTC	GAGTCTGCAGTCGCCTCTTAG
BnaA08g21730Dp	CGGTGGTGCTCCAGTCTCCA	GCATGAACCACTCTCTCAGGGATC
BnaA06g18440Dp	CATCCGATTACACTGCTGCTATTG	CGAGATCTGATTCTGTCGGTG
BnaC01g18020Dp	ACGATACCGAGGTTCCTTCAG	CCAAATGCATCCTCTCTCTGCAGTA
BnaC08g23150Dp	CTCGGTGGAAATGGAATTGTAGGAG	GGTTTGAAACTCGCAATCCCTG
BnaA07g24860Dp	TTCCGTTGGCTTCACCGATTTAC	CGTGCGTGATCCTTCACAGG
BnaA01g07910Dp	ACATTGCATTTTGGCGAGCAAT	AGTATTCTCTGTGCGAACTATCTCG
